# Supplementary material
Source: ML conference proceedings conference paper supplement (https://aclanthology.org/2022.tsar-1.6)
Supplement: dataset [file 2022.tsar-1.6.dataset.zip]

## All Sentence pairs

Sentences are from college writing centers.

**Wordy:** The politician talked about several of the merits of after-school programs in his speech.

**Concise:** The politician touted after-school programs in his speech. (Purdue University)

**Wordy:** Suzie believed but could not confirm that Billy had feelings of affection for her.

**Concise:** Suzie assumed that Billy adored her. (Purdue University)

**Wordy:** Our Web site has made available many of the things you can use for making a decision on the best dentist.

**Concise:** Our website presents criteria for determining the best dentist. (Purdue University)

**Wordy:** Working as a pupil under someone who develops photos was an experience that really helped me learn a lot.

**Concise:** Working as a photo technician's apprentice was an educational experience. (Purdue University)

**Wordy:** The teacher demonstrated some of the various ways and methods for cutting words from my essay that I had written for class.

**Concise:** The teacher demonstrated methods for cutting words from my essay. (Purdue University)

**Wordy:** Eric Clapton and Steve Winwood formed a new band of musicians together in 1969, giving it the ironic name of Blind Faith because early speculation that was spreading everywhere about the band suggested that the new musical group would be good enough to rival the earlier bands that both men had been in, Cream and Traffic, which people had really liked and had been very popular.

**Concise:** Eric Clapton and Steve Winwood formed a new band in 1969, ironically naming it Blind Faith because speculation suggested that the group would rival the musicians' previous popular bands, Cream and Traffic. (Purdue University)

**Wordy:** Many have made the wise observation that when a stone is in motion rolling down a hill or incline that that moving stone is not as likely to be covered all over with the kind of thick green moss that grows on stationary unmoving things and

becomes a nuisance and suggests that those things haven't moved in a long time and probably won't move any time soon.

**Concise:** A rolling stone gathers no moss. (Purdue University)

**Wordy:** For each and every book you purchase, you will receive a free bookmark.

**Concise:** For every book you purchase, you will receive a free bookmark. (University of North Carolina, 2021)

**Wordy:** Because a great many of the words in this sentence are basically unnecessary, it would really be a very good idea to edit somewhat for conciseness.

**Concise:** Because many of the words in this sentence are unnecessary, we should edit it. (University of North Carolina, 2021)

**Wordy:** The reason for the failure of the basketball team of the University of North Carolina in the Final Four game against the team from Kansas was that on that day and at that time, some players were frequently unable to rebound the ball.

**Concise:** UNC's basketball team lost the Final Four game against Kansas because it could not consistently rebound the ball. (University of North Carolina, 2021)

**Wordy:** Do not try to anticipate in advance those events that will completely revolutionize society.

**Concise:** Do not try to anticipate revolutionary events. (University of North Carolina, 2021)

**Wordy:** In the event that going out for the purpose of eating with them cannot be avoided, it is necessary that we first go to the ATM, in light of the fact that I am out of cash.

**Concise:** If we must go out to eat with them, we should first go to the ATM because I am out of cash. (University of North Carolina, 2021)

**Wordy:** If you do not have more than five years of experience, do not call for an interview if you have not already spoken to human resources.

**Concise:** Applicants with more than five years of experience can bypass human resources and call for an interview. (University of North Carolina, 2021)

**Wordy:** The 1780 constitution of Massachusetts

was written by John Adams.

**Concise:** John Adams wrote the 1780 Massachusetts Constitution. (University of North Carolina, 2021)

**Wordy:** The letter was taken to the mailbox by Sally.

**Concise:** Sally took the letter to the mailbox. (University of North Carolina, 2021)

**Wordy:** The manager is deficient in interpersonal skills and invests minimal time in assisting the clerks to develop their expertise.

**Concise:** The manager lacks interpersonal skills and spends little time helping the clerks develop their skills. (Monash University, 2020)

**Wordy:** Coral reefs can be damaged by rapid and substantial climatic changes.

**Concise:** Rapid and substantial climatic changes can damage coral reefs. (Monash University, 2020)

**Wordy:** The current upsurge in stakeholder dissatisfaction with the outcomes of local government decision-making is at least partially a consequence of the predilection against long-term planning.

**Concise:** The current rise in stakeholder dissatisfaction with local government decisions is at least partly due to the lack of long-term planning. (Monash University, 2020)

**Wordy:** The next step will be to undertake a thorough analysis of the results.

**Concise:** The next step will be to thoroughly analyse the results. (Monash University, 2020)

**Wordy:** Regular reviews of online content should be scheduled.

**Concise:** Online content should be reviewed regularly. **OR** Companies should review online content regularly. (Monash University, 2020)

**Wordy:** One important factor to consider is the age at which language instruction begins.

**Concise:** One important consideration is the age at which language instruction begins. (Monash University, 2020)

**Wordy:** The novel is preoccupied with matters such as post-colonial society and its mores, race, madness, and family relationships.

**Concise:** The novel is preoccupied with post-

colonial society and its mores, race, madness, and family relationships. (Monash University, 2020)

**Wordy:** In the event that dividends continue to fall, it will be necessary to reduce staff numbers.

**Concise:** If dividends continue to fall, it will be necessary to reduce staff numbers. (Monash University, 2020)

**Wordy:** The opinion of the working group was that the budget for the project had been set too low.

**Concise:** The working group's opinion was that the project budget had been set too low. (Monash University, 2020)

**Wordy:** There are two goals for the project; to estimate the future energy needs of the South Pacific and to make recommendations as to the most viable renewable energy production options suitable for the region.

**Concise:** The project goals are to estimate the future energy needs of the South Pacific and to recommend the most viable renewable energy production options for the region. (Monash University, 2020)

**Wordy:** Measurement of scanner performance can be achieved through examination of four criteria; resolution, bit-depth, dynamic range and software.

**Concise:** Scanner performance can be measured by examining four criteria: resolution, bit-depth, dynamic range and software. (Monash University, 2020)

**Wordy:** In high school, where I had the opportunity for three years of working with the student government, I realized how significantly a person's enthusiasm can be destroyed merely by the attitudes of his superiors.

**Concise:** In high school, during three years on the student council, I saw students' enthusiasm destroyed by insecure teachers and cynical administrators. (George Mason University, 2021b)

**Wordy:** The poverty of Anne Moody was also a crucial factor in the formation of her character.

**Concise:** Anne Moody's poverty also helped form her character. (George Mason University, 2021b)

**Wordy:** Frequently, a chapter in a book reveals

to the reader the main point that the author desires to bring out during the course of the chapter.

**Concise:** A chapter's title often reveals its thesis. (George Mason University, 2021b)

**Wordy:** In both Orwell's and Baldwin's essays, the feeling of white supremacy is very important.

**Concise:** Both Orwell and Baldwin trace the consequences of white supremacy. (George Mason University, 2021b)

**Wordy:** The scene is taking place at night, in front of the capitol building.

**Concise:** The scene takes place at night, in front of the capitol building. (George Mason University, 2021b)

**Wordy:** The friar is knowledgeable about Juliet being alive.

**Concise:** The friar knows that Juliet is alive. (George Mason University, 2021b)

**Wordy:** There are two pine trees which are growing behind this house.

**Concise:** Two pine trees grow behind this house. (George Mason University, 2021b)

**Wordy:** Any student could randomly sit anywhere.

**Concise:** Students could sit anywhere. (George Mason University, 2021b)

**Wordy:** Housing for married students is not unworthy of consideration.

**Concise:** Housing for married students is worthy of consideration. (George Mason University, 2021b)

**Wordy:** This is a quote from Black Elk's autobiography that discloses his prophetic powers.

**Concise:** This quote from Black Elk's autobiography discloses his prophetic powers. (George Mason University, 2021b)

**Wordy:** It is frequently considered that Hamlet is Shakespeare's most puzzling play.

**Concise:** Hamlet is frequently considered Shakespeare's most puzzling play. (George Mason University, 2021b)

**Wordy:** It has been argued by Stargill that there is no topic in education on which there is greater

agreement and consensus among educators than on the need for parental involvement in classrooms (Stargill, 2009).

**Concise:** Educators agree on the need for parental involvement in classrooms (Stargill, 2009). (Walden University)

**Wordy:** Scholars, researchers, and writers have recommended and promoted student assessment as a means by which to address the achievement gap.

**Concise:** Researchers have recommended student assessment to address the achievement gap. (Walden University)

**Wordy:** There are 30 participants who volunteered for the study.

**Concise:** Thirty participants volunteered for the study. (Walden University)

**Wordy:** I feel that the study is very significant to scholars in psychology.

**Concise:** The study is significant to psychology scholars. (Walden University)

**Wordy:** We will be home in a period of ten days.

**Concise:** We will be home in ten days. (University of Arizona Global Campus)

**Wordy:** It has come to my attention that there is a vast proliferation of undesirable vegetation surrounding the periphery of this facility.

**Concise:** I have noticed many weeds growing around the building. (University of Arizona Global Campus)

**Wordy:** A decision to vote on the issue was made by the committee this week.

**Concise:** This week, the committee decided to vote on the issue. (University of Arizona Global Campus)

**Wordy:** Jon will let me know in the event that he can get away and make the trip.

**Concise:** Jon will call me if he can go. (University of Arizona Global Campus)

**Wordy:** There are four officers who report to the captain.

**Concise:** Four officers report to the captain. (University of Arizona Global Campus)

**Wordy:** Luis was interested in the data process-

ing field.

**Concise:** Luis was interested in data processing. (University of Arizona Global Campus)

**Wordy:** I said that I was tired.

**Concise:** I said I was tired. (University of Arizona Global Campus)

**Wordy:** I stepped off of the curb.

**Concise:** I stepped off the curb. (University of Arizona Global Campus)

**Wordy:** I got up on the ladder.

**Concise:** I got on the ladder. (University of Arizona Global Campus)

**Wordy:** Many people prefer Marvel Comics (to DC Comics), due to the fact that they explore more characters in their canon.

**Concise:** Many people prefer Marvel Comics (to DC Comics) because they explore more characters in their canon. (University of Illinois Springfield)

**Wordy:** Marvel fans watch Agents of S.H.I.E.L.D. in order to expand their knowledge of the Marvel canon.

**Concise:** Marvel fans watch Agents of S.H.I.E.L.D. to expand their knowledge of the Marvel canon. (University of Illinois Springfield)

**Wordy:** There are many examples why Marvel is the stronger comic.

**Concise:** Many examples support why Marvel is the stronger comic. (University of Illinois Springfield)

**Wordy:** It is clear that DC has superior superheroes in its canon.

**Concise:** DC has superior superheroes in its canon. (University of Illinois Springfield)

**Wordy:** I believe that Channing Tatum may not make the best Gambit in the upcoming movie.

**Concise:** Channing Tatum may not make the best Gambit in the upcoming movie. (University of Illinois Springfield)

**Wordy:** My favorite superheroes are both Batman and Iron Man.

**Concise:** My favorite superheroes are Batman and Iron Man. (University of Illinois Springfield)

**Wordy:** Man of Steel and Batman vs. Superman

disappointed at the box office, and the reason why is because people are tired of origin stories.

**Concise:** Man of Steel and Batman vs. Superman disappointed at the box office because people are tired of origin stories. (University of Illinois Springfield)

**Wordy:** She was in an elated state of mind.

**Concise:** She was elated. (University of Illinois Springfield)

**Wordy:** They are connected together.

**Concise:** They are connected. (University of Illinois Springfield)

**Wordy:** They have many traits in common to both.

**Concise:** They share many traits. (University of Illinois Springfield)

**Wordy:** The houses are in close proximity.

**Concise:** The houses are nearby. (University of Illinois Springfield)

**Wordy:** He has no emotional feelings.

**Concise:** He has no feelings. (University of Illinois Springfield)

**Wordy:** Each and every person should come.

**Concise:** Everyone should come. (University of Illinois Springfield)

**Wordy:** The Acme Corporation is developing a new consumer device that allows users to communicate vocally in real time.

**Concise:** The Acme Corporation is developing a new cell phone. (Stanford University)

**Wordy:** Basically, the first widget pretty much surpassed the second one in overall performance.

**Concise:** The first widget performed better than the second. (Stanford University)

**Wordy:** The engineer considered the second monitor an unneeded luxury.

**Concise:** The engineer considered the second monitor a luxury. (Stanford University)

**Wordy:** The test revealed conduction activity that was peculiar in nature.

**Concise:** The test revealed peculiar conduction activity. (Stanford University)



**Wordy:** We redid the experiment due to the fact that our initial method was incorrect.

**Concise:** We redid the experiment because our initial method was incorrect. (Stanford University)

**Wordy:** Your audience will not appreciate the details that lack relevance.

**Concise:** Your audience will appreciate relevant details. (Stanford University)

**Wordy:** The Acme Corporation continues to work on the cell phone case configuration revision project.

**Concise:** The Acme Corporation is developing a redesigned cell phone case. (Stanford University)

**Wordy:** The design was completed by us.

**Concise:** We completed the design. (Stanford University)

**Wordy:** Our lack of data prevented evaluation of the areas in most need of assistance.

**Concise:** Because we lacked data, we could not evaluate the areas that most needed assistance. (Stanford University)

**Wordy:** The discovery of a method for the manufacture of artificial skin will have the result of an increase in the survival of patients with radical burns.

**Concise:** If researchers discover how to manufacture artificial skin, more patients will survive radical burns. (Stanford University)

**Wordy:** The outcome is dependent on the data.

**Concise:** The outcome depends on the data. (Stanford University)

**Wordy:** There is the possibility of approval of the study ahead of time.

**Concise:** Robin may approve of the study ahead of time. (Stanford University)

**Wordy:** The lack of any knowledge on the part of the investigators about local conditions precluded determination of committee action effectiveness in fund allocation to those areas in greatest need of assistance.

**Concise:** Because the investigators did not know anything about local conditions, they could not determine how effectively the committee had allocated funds to the areas that most needed assistance.

(Stanford University)

**Wordy:** It was instructed by the professor that the assignments must be submitted by the due date.

**Concise:** The professor instructed that the assignment be submitted by the due date. (The University of Rhode Island, 2019)

**Wordy:** It was earlier demonstrated that climate change can be caused by air pollution.

**Concise:** Early studies demonstrated that air pollution can cause climate change. (The University of Rhode Island, 2019)

**Wordy:** An evaluation of the methods needs to be done.

**Concise:** The methods need to be evaluated.  
**OR** We need to evaluate the methods. (The University of Rhode Island, 2019)

**Wordy:** It was the final result that finally persuaded me.

**Concise:** The final result finally persuaded me. (The University of Rhode Island, 2019)

**Wordy:** There are likely to be many researchers that raise questions about this methodological approach.

**Concise:** Many researchers are likely to question this methodology. (The University of Rhode Island, 2019)

**Wordy:** Research is increasing in the field of nutrition and food science.

**Concise:** Research is increasing in nutrition and food science. **OR** Research within nutrition and food science is increasing. (The University of Rhode Island, 2019)

**Wordy:** The focus of this project was to study the effects of sea level rise on coastal habitats.

**Concise:** This project examined how sea level rise affects coastal habitats. (The University of Rhode Island, 2019)

**Wordy:** The students were researching climate change impacts.

**Concise:** The students researched climate change impacts. (The University of Rhode Island, 2019)

**Wordy:** These results are in agreement with

prior findings.

**Concise:** These results agree with prior findings. (University of BORÅS)

**Wordy:** We performed an analysis of several factors.

**Concise:** We analysed several factors. (University of BORÅS)

**Wordy:** Our results are in opposition to Johnson's study.

**Concise:** Our results contradict Johnson's study. (University of BORÅS)

**Wordy:** Our method is an improvement over prior systems.

**Concise:** Our method improves on prior systems. (University of BORÅS)

**Wordy:** AjeA was found to be present in the nucleus.

**Concise:** AjeA localised to the nucleus. (University of BORÅS)

**Wordy:** Table 1 presents a summary of the patient data.

**Concise:** Table 1 summarises the patient data. (University of BORÅS)

**Wordy:** An analysis of learning outcomes was made on the basis of the findings.

**Concise:** Learning outcomes were analysed on the basis of the findings. (University of BORÅS)

**Wordy:** There was considerable waste after production.

**Concise:** The production created considerable waste. (University of BORÅS)

**Wordy:** They made the decision to adjust.

**Concise:** They decided to adjust. (University of BORÅS)

**Wordy:** The reduction in the census was caused by the lack of a favourable response by officials.

**Concise:** The lack of a favourable official response reduced the census. (University of BORÅS)

**Wordy:** The cornerstone to the government providing essential emergency services to its citizens is ensuring there has been effective planning to anticipate a variety of challenges to deliver these critical services.

**Concise:** To provide essential emergency services to its citizens, the government must plan effectively. (Naval Postgraduate School, 2021a)

**Wordy:** The most authoritative account of the Great Umbrella Tariffs of 1810-13 was written by Philippa von Phrasewitz in the years immediately following those storied events.

**Concise:** Philippa von Phrasewitz wrote the most authoritative account of the Great Umbrella Tariffs of 1810-13 in the years immediately following those storied events. (Naval Postgraduate School, 2021a)

**Wordy:** The survey was designed by the research assistant.

**Concise:** The research assistant designed the survey. (University of Leeds, 2017)

**Wordy:** First and foremost, the pieces must be aligned in an accurate manner.

**Concise:** First, the pieces must be aligned accurately. (Texas A&M University)

**Wordy:** Whatever results are found during the trials, and they may or may not be favorable, we will stand behind the science.

**Concise:** Whatever results are found during the trials, we will stand behind the science. (Texas A&M University)

**Wordy:** We must make, if we want to be respected, sound choices.

**Concise:** If we want to be respected, we must make sound choices. **OR** We must make sound choices if we want to be respected. (Texas A&M University)

**Wordy:** There are several syntactic devices that let you manage where you locate units of new information in a sentence.

**Concise:** Several syntactic devices let you manage where you locate units of new information in a sentence. (Texas A&M University)

**Wordy:** The use of this method would eliminate the problem.

**Concise:** This method would eliminate the problem. (Texas A&M University)

**Wordy:** Scientists have learned that their observations are as subjective as those in any other field

in recent years.

**Concise:** In recent years, scientists have learned that their observations are as subjective as those in any other field. (Texas A&M University)

**Wordy:** The group of science students sat their exams.

**Concise:** The science students sat their exams. (Massey University)

**Wordy:** Smith (2006) also believed this to be true, but took into consideration the fact that some managers also preferred to have long meetings that took all day.

**Concise:** Smith(2006) agreed, but considered the fact that some managers preferred to have longer, all-day meetings. (Massey University)

**Wordy:** The farmer sheared the sheep and removed all their wool.

**Concise:** The farmer sheared the sheep. (Massey University)

**Wordy:** There are several of the soldiers, each with their guns and ammunition, who gathered at the gates of the camp before dawn.

**Concise:** Several of the soldiers, each with their own guns and ammunition, gathered at the camp gates before dawn. (Massey University)

**Wordy:** As far as my professor is concerned, the problem of wordiness is the thing she'd really like to see us involved with actually eliminating.

**Concise:** My professor wants us to focus on eliminating wordiness. (University of Arkansas at Little Rock)

**Wordy:** There are many women who never marry.

**Concise:** Many women never marry. (University of Arkansas at Little Rock)

**Wordy:** It is his last book that shows his genius best.

**Concise:** His last book shows his genius best. (University of Arkansas at Little Rock)

**Wordy:** Many uneducated citizens who have never attended school continue to vote for better schools.

**Concise:** Many uneducated citizens who have never attended school continue to vote for better

schools. (Commnet)

**Wordy:** All things considered, Connecticut's woodlands are in better shape now than ever before.

**Concise:** Connecticut's woodlands are in better shape now than ever before. (Commnet)

**Wordy:** As a matter of fact, there are more woodlands in Connecticut now than there were in 1898.

**Concise:** There are more woodlands in Connecticut now than there were in 1898. (Commnet)

**Wordy:** As far as I'm concerned, there is no need for further protection of woodlands.

**Concise:** Further protection of woodlands is not needed. (Commnet)

**Wordy:** This is because there are fewer farmers at the present time.

**Concise:** This is because there are fewer farmers now. (Commnet)

**Wordy:** Woodlands have grown in area because of the fact that farmers have abandoned their fields.

**Concise:** Woodlands have grown in area because farmers have abandoned their fields. (Commnet)

**Wordy:** Major forest areas are coming back by means of natural processes.

**Concise:** Major forest areas are coming back naturally. (Commnet)

**Wordy:** Our woodlands are coming back by virtue of the fact that our economy has shifted its emphasis.

**Concise:** Our woodlands are coming back because our economy has shifted its emphasis. (Commnet)

**Wordy:** Due to the fact that their habitats are being restored, forest creatures are also re-establishing their population bases.

**Concise:** Because their habitats are being restored, forest creatures are also re-establishing their population bases. (Commnet)

**Wordy:** The fear that exists among many people that we are losing our woodlands is uncalled for.

**Concise:** The fear among many people that we are losing our woodlands is uncalled for. (Commnet)

**Wordy:** The era in which we must aggressively defend our woodlands has, for all intents and purposes, passed.

**Concise:** The era in which we must aggressively defend our woodlands has passed. (Commnet)

**Wordy:** For the most part, people's suspicions are based on a misunderstanding of the facts.

**Concise:** People's suspicions are based on a misunderstanding of the facts. (Commnet)

**Wordy:** Many woodlands, in fact, have been purchased for the purpose of creating public parks.

**Concise:** Many woodlands, in fact, have been purchased as public parks. (Commnet)

**Wordy:** This policy has a tendency to isolate some communities.

**Concise:** This policy tends to isolate some communities. (Commnet)

**Wordy:** The policy has, in a manner of speaking, begun to Balkanize the more rural parts of our state.

**Concise:** The policy has begun to Balkanize the more rural parts of our state. (Commnet)

**Wordy:** In a very real sense, this policy works to the detriment of those it is supposed to help.

**Concise:** This policy works to the detriment of those it is supposed to help. (Commnet)

**Wordy:** In my opinion, this wasteful policy ought to be revoked.

**Concise:** This wasteful policy ought to be revoked. (Commnet)

**Wordy:** In the case of this particular policy, citizens of northeast Connecticut became very upset.

**Concise:** Citizens of northeast Connecticut became very upset about his policy. (Commnet)

**Wordy:** In the final analysis, the state would have been better off without such a policy.

**Concise:** The state would have been better off without such a policy. (Commnet)

**Wordy:** In the event that enough people protest, it will probably be revoked.

**Concise:** If enough people protest, it will probably be revoked. (Commnet)

**Wordy:** Something in the nature of a repeal may soon take place.

**Concise:** Something like a repeal may soon take place. (Commnet)

**Wordy:** Legislators are already in the process of reviewing the statutes.

**Concise:** Legislators are already reviewing the statutes. (Commnet)

**Wordy:** It seems that they can't wait to get rid of this one.

**Concise:** They can't wait to get rid of this one. (Commnet)

**Wordy:** They have monitored the activities of conservationists in a cautious manner.

**Concise:** They have cautiously monitored the activities of conservationists. (Commnet)

**Wordy:** The point I am trying to make is that sometimes public policy doesn't accomplish what it set out to achieve.

**Concise:** Sometimes public policy doesn't accomplish what it set out to achieve. (Commnet)

**Wordy:** Legislators need to be more careful of the type of policy they propose.

**Concise:** Legislators need to be more careful of the policy they propose. (Commnet)

**Wordy:** What I mean to say is that well intentioned lawmakers sometimes make fools of themselves.

**Concise:** Well intentioned lawmakers sometimes make fools of themselves. (Commnet)

**Wordy:** Smith College, which was founded in 1871, is the premier all-women's college in the United States.

**Concise:** Founded in 1871, Smith College is the premier all-women's college in the United States. (Commnet)

**Wordy:** Citizens who knew what was going on voted him out of office.

**Concise:** Knowledgeable citizens voted him out of office. (Commnet)

**Wordy:** Recommending that a student copy from another student's paper is not something he would recommend.

**Concise:** He would never tell a student to copy from another student's paper. (Commnet)



**Wordy:** Unencumbered by a sense of responsibility, Jasion left his wife with forty-nine kids and a can of beans.

**Concise:** Jasion irresponsibly left his wife with forty-nine kids and a can of beans. (Commnet)

**Wordy:** At this point in time we can't ascertain the reason as to why the screen door was left open.

**Concise:** We don't know why the screen door was left open. (Commnet)

**Wordy:** My sister, who is employed as a nutritionist at the University of Michigan, recommends the daily intake of megadoses of Vitamin C.

**Concise:** My sister, a nutritionist at the University of Michigan, recommends daily megadoses of Vitamin C. (Commnet)

**Wordy:** Basically, in light of the fact that Congressman Fuenches was totally exhausted by his last campaign, there was an expectation on the part of the voters that he would not reduplicate his effort to achieve office in government again.

**Concise:** Because Congressman Fuenches was exhausted by his last campaign, voters expected he would not seek re-election. **OR** Voters thought that Congressman Fuenches was so exhausted by his last campaign that he wouldn't seek re-election. (Commnet)

**Wordy:** It is to be hoped that we discover a means to create an absolutely proper and fitting tribute to Professor Espinoza.

**Concise:** We hope for an appropriate tribute to Professor Espinoza. (Commnet)

**Wordy:** There is a desire on the part of many of us to maintain a spring recess for the purpose of getting away from the demands of our studies.

**Concise:** We want a spring recess so we can get away from our studies. **OR** We want a spring recess to escape our studies. (Commnet)

**Wordy:** What is your basic understanding of predestination?

**Concise:** Explain predestination. (Commnet)

**Wordy:** At what point in time will a downturn in the stock market have a really serious effect on the social life of people as a whole?

**Concise:** When will a downturn in the stock market affect society? (Commnet)

**Wordy:** I would call your attention to the fact that our President, who was formerly the Governor of Arkansas, is basically a Southerner.

**Concise:** Our President, formerly the Governor of Arkansas, is a Southerner. (Commnet)

**Wordy:** There are millions of fans who desperately want the Hartford Whalers to stay in the city.

**Concise:** Millions of fans desperately want the Hartford Whalers to stay in the city. (Commnet)

**Wordy:** Bothered by allergies, a condition that made them sneeze, some of the preschool children had sinus troubles that caused them to miss several days in nursery school this spring.

**Concise:** Bothered by allergies, some children missed several days in nursery school this spring. (Commnet)

**Wordy:** The nursery school teacher education training sessions involve active interfacing with preschool children of the appropriate age as well as intensive peer interaction in the form of role playing.

**Concise:** Training for nursery school teachers involves interacting with preschoolers and role playing with peers. (Commnet)

**Wordy:** He found his neighbor who lived next door to be attractive in appearance.

**Concise:** He found his neighbor attractive. (Commnet)

**Wordy:** He was really late to his English class due to the fact that he had to finish his math test.

**Concise:** He was late for English because he had to finish his math test. (Commnet)

**Wordy:** Although they were several in number, the street gang feared the police.

**Concise:** Although they were a large group, the street gang feared the police. (Commnet)

**Wordy:** Bob provided an explanation of the computer to his grandmother.

**Concise:** Bob explained the computer to his grandmother. (Commnet)

**Wordy:** During the time when I lived in South Carolina, it was my intention to go to college in Florida.

**Concise:** When I lived in South Carolina, I

planned to attend college in Florida. (Commnet)

**Wordy:** In order to prove that he could hold his own on the track team, Gordo had to train hard like the old runners.

**Concise:** To prove that he could hold his own on the track team, Gordo had to train hard like the older runners. (Commnet)

**Wordy:** If you go to the store, you will see that the store is closed on Sundays because the storeowner likes to go to church.

**Concise:** If you go to the store, you will see that it is closed on Sunday because the owner likes to go to church. **OR** The store is closed on Sundays because the owner attends church. (Commnet)

**Wordy:** Due to the fact that Jim liked chocolate, he was very upset when the candy company canceled production of his favorite chocolate bar.

**Concise:** Because Jim liked chocolate, he was very upset when the candy company canceled his favorite chocolate bar. **OR** Jim was upset when the candy company canceled production of his favorite chocolate bar. (Commnet)

**Wordy:** One time when I went to the park, my friend, whose name is Jake, went with me and we had fun due to the fact that it was a nice day out.

**Concise:** When I went to the park with my friend Jake, we had fun because it was such a nice day. (Commnet)

**Wordy:** In this report I will conduct a study of ants and the setup of their colonies.

**Concise:** I will study ants and their colonies in this report. **OR** This report studies ants. (Commnet)

**Wordy:** An investigation of the symbolic overtones in Melville's "Billy Budd, Sailor" reveals the opposing personas of Billy Budd's naivete and Claggart's vituperative demeanor.

**Concise:** The powerful symbols in Melville's "Billy Budd, Sailor" develop Budd's innocence in contrast to the corrupt Claggart. (Commnet)

**Wordy:** In hopes of rejuvenating their romantic liaison, the couple went on a pilgrimage to become one with nature.

**Concise:** In hopes of rekindling their romance, the couple went camping. (Commnet)

**Wordy:** A mathematical mindset best suits the making of decisions that profoundly affect this company's future business relations.

**Concise:** Executive decisions require precise calculations. (Commnet)

**Wordy:** Joe found that the fictional novel by Alcott, Little Women, conveyed a sense of emotion and feeling.

**Concise:** Joe found Alcott's book, Little Women, both delightful and tragic. (Commnet)

**Wordy:** The existence of computers and computer technology has greatly influenced commercial enterprise and information exchange.

**Concise:** Computers have improved business communication. (Commnet)

**Wordy:** Attentive focusing on the professor's informational lecture was not always completely possible.

**Concise:** Focusing on professor's boring lectures was a problem for most students. (Commnet)

**Wordy:** After extensive nightly labors on an academic assignment, Sally needed a lengthy period of somnolence.

**Concise:** After staying up all night finishing a paper, Sally needed a long nap. (Commnet)

**Wordy:** My first visit to Boston will always be remembered by me.

**Concise:** I shall always remember my first visit to Boston. (Strunk, 1918)

**Wordy:** There were a great number of dead leaves lying on the ground.

**Concise:** Dead leaves covered the ground. (Strunk, 1918)

**Wordy:** The sound of the falls could still be heard.

**Concise:** The sound of the falls still reached our ears. (Strunk, 1918)

**Wordy:** The reason that he left college was that his health became impaired.

**Concise:** Failing health compelled him to leave college. (Strunk, 1918)

**Wordy:** It was not long before he was very sorry that he had said what he had.

**Concise:** He soon repented his words. (Strunk, 1918)

**Wordy:** Gold was not allowed to be exported.

**Concise:** It was forbidden to export gold. (Strunk, 1918)

**Wordy:** He has been proved to have been seen entering the building.

**Concise:** It has been proved that he was seen to enter the building. (Strunk, 1918)

**Wordy:** A survey of this region was made in 1900.

**Concise:** This region was surveyed in 1900. (Strunk, 1918)

**Wordy:** Mobilization of the army was rapidly carried out.

**Concise:** The army was rapidly mobilized. (Strunk, 1918)

**Wordy:** Confirmation of these reports cannot be obtained.

**Concise:** These reports cannot be confirmed. (Strunk, 1918)

**Wordy:** He was not very often on time.

**Concise:** He usually came late. (Strunk, 1918)

**Wordy:** He did not think that studying Latin was much use.

**Concise:** He thought the study of Latin useless. (Strunk, 1918)

**Wordy:** Formerly, science was taught by the textbook method, while now the laboratory method is employed.

**Concise:** Formerly, science was taught by the textbook method; now it is taught by the laboratory method. (Strunk, 1918)

**Wordy:** It was both a long ceremony and very tedious.

**Concise:** The ceremony was both long and tedious. (Strunk, 1918)

**Wordy:** Wordsworth, in the fifth book of *The Excursion*, gives a minute description of this church.

**Concise:** In the fifth book of *The Excursion*, Wordsworth gives a minute description of this church. (Strunk, 1918)

**Wordy:** Cast iron, when treated in a Bessemer converter, is changed into steel.

**Concise:** By treatment in a Bessemer converter, cast iron is changed into steel. (Strunk, 1918)

**Wordy:** There was a look in his eye that boded mischief.

**Concise:** In his eye was a look that boded mischief. (Strunk, 1918)

**Wordy:** He wrote three articles about his adventures in Spain, which were published in *Harper's Magazine*.

**Concise:** He published in *Harper's Magazine* three articles about his adventures in Spain. (Strunk, 1918)

**Wordy:** I received your inquiry that you wrote about tennis rackets yesterday, and read it thoroughly.

**Concise:** I received your inquiry about tennis rackets yesterday. (Purdue University)

**Wordy:** It goes without saying that we are acquainted with your policy on filing tax returns, and we have every intention of complying with the regulations that you have mentioned.

**Concise:** We intend to comply with the tax-return regulations that you have mentioned. (Purdue University)

**Wordy:** Imagine a mental picture of someone engaged in the intellectual activity of trying to learn what the rules are for how to play the game of chess.

**Concise:** Imagine someone trying to learn the rules of chess. (Purdue University)

**Wordy:** Baseball, one of our oldest and most popular outdoor summer sports in terms of total attendance at ball parks and viewing on television, has the kind of rhythm of play on the field that alternates between times when players passively wait with no action taking place between the pitches to the batter and then times when they explode into action as the batter hits a pitched ball to one of the players and the player fields it.

**Concise:** Baseball has a rhythm that alternates between waiting and explosive action. (Purdue University)

**Wordy:** Any particular type of dessert is fine

with me.

**Concise:** Any dessert is fine with me. (Purdue University)

**Wordy:** Balancing the budget by Friday is an impossibility without some kind of extra help.

**Concise:** Balancing the budget by Friday is impossible without extra help. (Purdue University)

**Wordy:** For all intents and purposes, American industrial productivity generally depends on certain factors that are really more psychological in kind than of any given technological aspect.

**Concise:** American industrial productivity depends more on psychological than on technological factors. (Purdue University)

**Wordy:** The supply manager considered the correcting typewriter an unneeded luxury.

**Concise:** The supply manager considered the correcting typewriter a luxury. (Purdue University)

**Wordy:** Before the travel agent was completely able to finish explaining the various differences among all of the many very unique vacation packages his travel agency was offering, the customer changed her future plans.

**Concise:** Before the travel agent finished explaining the differences among the unique vacation packages his travel agency was offering, the customer changed her plans. (Purdue University)

**Wordy:** During that time period, many car buyers preferred cars that were pink in color and shiny in appearance.

**Concise:** During that period, many car buyers preferred pink, shiny cars. (Purdue University)

**Wordy:** The microscope revealed a group of organisms that were round in shape and peculiar in nature.

**Concise:** The microscope revealed a group of peculiar, round organisms. (Purdue University)

**Wordy:** Jeff Converse, our chief of consulting, suggested at our last board meeting the installation of microfilm equipment in the department of data processing.

**Concise:** At our last board meeting, Chief Consultant Jeff Converse suggested that we install microfilm equipment in the data processing department. (Purdue University)

**Wordy:** We read the letter we received yesterday and reviewed it thoroughly.

**Concise:** We thoroughly read the letter we received yesterday. (Purdue University)

**Wordy:** As you carefully read what you have written to improve your wording and catch small errors of spelling, punctuation, and so on, the thing to do before you do anything else is to try to see where a series of words expressing action could replace the ideas found in nouns rather than verbs.

**Concise:** As you edit, first find nominalizations that you can replace with verb phrases. (Purdue University)

**Wordy:** An account was opened by Mrs. Simms.

**Concise:** Mrs. Simms opened an account. (Purdue University)

**Wordy:** Your figures were checked by the research department.

**Concise:** The research department checked your figures. (Purdue University)

**Wordy:** It is the governor who signs or vetoes bills.

**Concise:** The governor signs or vetoes bills. (Purdue University)

**Wordy:** There are four rules that should be observed.

**Concise:** Four rules should be observed. (Purdue University)

**Wordy:** There was a big explosion, which shook the windows, and people ran into the street.

**Concise:** A big explosion shook the windows, and people ran into the street. (Purdue University)

**Wordy:** The function of this department is the collection of accounts.

**Concise:** This department collects accounts. (Purdue University)

**Wordy:** The current focus of the medical profession is disease prevention.

**Concise:** The medical profession currently focuses on disease prevention. (Purdue University)

**Wordy:** The duty of a clerk is to check all incoming mail and to record it.

**Concise:** A clerk checks and records all incoming mail. (Purdue University)

**Wordy:** A shortage of tellers at our branch office on Friday and Saturday during rush hours has caused customers to become dissatisfied with service.

**Concise:** A teller shortage at our branch office on Friday and Saturday during rush hours has caused customer dissatisfaction. (Purdue University)

**Wordy:** It is possible that nothing will come of these preparations.

**Concise:** Nothing may come of these preparations. (Purdue University)

**Wordy:** She has the ability to influence the outcome.

**Concise:** She can influence the outcome. (Purdue University)

**Wordy:** It is necessary that we take a stand on this pressing issue.

**Concise:** We must take a stand on this pressing issue. (Purdue University)

**Wordy:** The point I wish to make is that the employees working at this company are in need of a much better manager of their money.

**Concise:** Employees at this company need a better money manager. (Purdue University)

**Wordy:** It is widely known that the engineers at Sandia Labs have become active participants in the Search and Rescue operations in most years.

**Concise:** In recent years, engineers at Sandia Labs have participated in the Search and Rescue operations. (Purdue University)

**Wordy:** After reviewing the results of your previous research, and in light of the relevant information found within the context of the study, there is ample evidence for making important, significant changes to our operating procedures.

**Concise:** After reviewing the results of your research, and within the context of the study, we find evidence supporting significant changes in our operating procedures. (Purdue University)

**Wordy:** The experiment was conducted at 1330 GMT and was conducted with an increased basal

rate with a double bolus.

**Concise:** The experiment was conducted at 1330 GMT using an increased basal rate and a double bolus. (Purdue University)

**Wordy:** The baseball game was attended by Morgan Latour.

**Concise:** Morgan Latour attended the baseball game. (Purdue University)

**Wordy:** In the following experiment, we used the feline cell line, W9, to evaluate cell growth in the presence of the growth factor.

**Concise:** The feline cell line W9 was used to evaluate cell growth in the presence of growth factor. (Purdue University)

**Wordy:** During the procedure, we cultured the cells for 48 hours in media that we modified with 78, 80, 90, and 110 ng/mL BMP.

**Concise:** Cells were cultured for 48 hours in media modified with 78, 80, 90, and 110 ng/mL BMP. (Purdue University)

**Wordy:** At 48 hours, we harvested cells from the cell culture dish and counted; we used a hemocytometer.

**Concise:** At 48 hours, cells were harvested from the culture dish and counted using hemocytometer. (Purdue University)

**Wordy:** Usner's work is an attempt at revision of orthodox historiography.

**Concise:** Usner attempts to revise orthodox historiography. (Hamilton College)

**Wordy:** An example of thorough analysis is when Tierney cites Wiseman's extensive data.

**Concise:** Tierney's citing of Wiseman's extensive data exemplifies thorough analysis. (Hamilton College)

**Wordy:** The process of modernization in any society is seen as a positive change.

**Concise:** Most people see modernization in a society as a positive change. (Hamilton College)

**Wordy:** Donner's misuse of information is exposed by the facts.

**Concise:** The facts expose Donner's misuse of information. (Hamilton College)



**Wordy:** Successful globalization depends on factors that involve culture more than economics.

**Concise:** Successful globalization depends more on culture than economics. (Hamilton College)

**Wordy:** Tom Jones is a novel that comically portrays English society in the eighteenth century.

**Concise:** The novel Tom Jones comically portrays eighteenth century English society. (Hamilton College)

**Wordy:** There are indications of Privo's misunderstanding of natural selection in her argument.

**Concise:** Privo's argument demonstrates her misunderstanding of natural selection. (Hamilton College)

**Wordy:** Modern society is in need of a recalibration of its moral values.

**Concise:** Modern society needs to recalibrate its moral values. (Hamilton College)

**Wordy:** Attempts by economists at defining full employment have been met with failure.

**Concise:** Economists' attempts at defining full employment have failed. (Hamilton College)

**Wordy:** One of the most important indications of the sensorimotor period is the development of object permanence.

**Concise:** The development of object permanence is a key indicator of the sensorimotor period. (Hamilton College)

**Wordy:** Bill is kicked by Jim.

**Concise:** Jim kicks Bill. (Loyola University New Orleans)

**Wordy:** Bill screamed loudly as he was being kicked very forcefully by Jim.

**Concise:** Bill screamed as Jim kicked him forcefully. (Loyola University New Orleans)

**Wordy:** This manual of instructions was prepared by our company to aid and assist our dealers in being helpful to their customers.

**Concise:** Our company prepared this instruction manual to help our dealers serve their customers. (Loyola University New Orleans)

**Wordy:** As a result of an infraction of a minor nature, Jonathan was kicked in the shin by Matthew,

which caused Jonathan pain of a medium degree.

**Concise:** After Jonathan committed a minor infraction, Mathew kicked Jonathan in the shin, causing Jonathan pain. (Rowan College of South Jersey)

**Wordy:** The author's intention of the article is to argue for the elimination of the passivity of the learner in college through using recent studies that show the value of collaborative learning in the classroom environment.

**Concise:** The author cites recent research and argues for collaboration as a way to eliminate passivity and stimulate classroom active learning. (Antioch University)

**Wordy:** The new interpretations on canine aggressive behavior researched by Cesar Milano are actually conceived by using a method that originally was used by Skinner and the early scholars in behaviorism.

**Concise:** Cesar Millan uses Behaviorism in researching canine aggression. (Antioch University)

**Wordy:** In this paragraph is a demonstration of the use of good style in the writing of a report.

**Concise:** This paragraph demonstrates good style in report writing. (McDaniel College)

**Wordy:** The point that I wish to make is that the employees working at this company are in need of a much better manager of their money.

**Concise:** This company's employees need a much better money manager. (McDaniel College)

**Wordy:** If the two materials have drastically different coefficients of expansion, the difference in the rates of expansion will cause stress on the coupling and will cause the point where the two materials are joined to become weak and less secure.

**Concise:** Joining two materials with significantly different coefficients of expansion can cause stress in the coupling due to the different rates of expansion, weakening the joint. (The University of Iowa)

**Wordy:** Before we ran any of the tests, we measured the cross-sectional width and thickness of the sample as well as the initial length of the sample.

**Concise:** The initial length, thickness, and cross-sectional width of the sample were measured before

running the tests. (The University of Iowa)

**Wordy:** I think that all I can usefully say on this point is that in the normal course of their professional activities social anthropologists are usually concerned with the third of these alternatives, while the other two levels are treated as raw data for analysis.

**Concise:** Social anthropologists usually concentrate on the third alternative, treating the other two as raw data. (University of Central Florida)

**Wordy:** The best teachers help each student become a better student both academically and emotionally.

**Concise:** The best teachers help each student grow both academically and emotionally. (College of Saint Benedict & Saint John's University)

**Wordy:** It is imperative that all night managers follow strict procedures when locking the safe.

**Concise:** All night managers must follow strict procedures when locking the safe. (College of Saint Benedict & Saint John's University)

**Wordy:** The migration away from Java to Singapore by the British Royal Navy, which was a westward shifting of their base of power in Southeast Asia, was also the dominant factor in ensuring the Dutch were able to control Indonesia for decades.

**Concise:** The British Royal Navy migrated from Java to Singapore, shifting their Southeast Asian power base westward and ensuring the Dutch controlled Indonesia for decades. (Carnegie Mellon University)

**Wordy:** There are problems with the lease.

**Concise:** The lease has problems. (Butte College)

**Wordy:** There are several good reasons to delay making this decision.

**Concise:** We should delay making this decision for several reasons. (Butte College)

**Wordy:** There is a natural desire among adolescents to experience freedom from authority.

**Concise:** Adolescents naturally crave freedom from authority. (Butte College)

**Wordy:** There is a requirement that all students have an evaluation of their transcripts for placement

purposes or to meet a prerequisite.

**Concise:** The college requires that the admissions office evaluate all student transcripts for placement and prerequisites. (Butte College)

**Wordy:** That sofa is large in size.

**Concise:** That sofa is large. (University of Arkansas)

**Wordy:** Compulsory attendance at social events is required.

**Concise:** Attendance at social events is required. (University of Arkansas)

**Wordy:** The housing situation can have a big impact on the social aspect of a student's life.

**Concise:** Housing can influence a student's life. (University of Arkansas)

**Wordy:** I think that there are too many issues with this computer.

**Concise:** There are too many issues with this computer. (University of Arkansas)

**Wordy:** The point that I wish to make is that Google is a very effective and innovative company.

**Concise:** Google is an effective and innovative company. (University of Arkansas)

**Wordy:** The fact of the matter is that culture is a complicated term to define.

**Concise:** Culture is a complicated term to define. (University of Arkansas)

**Wordy:** There is general agreement among climate scientists as to the elevation of global temperatures as a result of carbon dioxide in the atmosphere.

**Concise:** Most climate scientists agree that carbon dioxide in the atmosphere is elevating global temperatures. (Ding, 2021)

**Wordy:** Engineers cannot avoid utilising complex and difficult technical terms in order to clearly analyse requirements and describe them in a precise and meaningful way.

**Concise:** Engineers must use technical terms when writing clear requirements specifications. (Ding, 2021)

**Wordy:** Attempts by researchers at identification of the AIDS virus have met with success; how-

ever, attempts at development of a vaccine for the immunisation of those at risk have failed.

**Concise:** AIDS researchers have identified the AIDS virus but have failed to develop a vaccine that will immunise those at risk. (Ding, 2021)

**Wordy:** Any departures by the members from established procedures may cause termination of membership by the Board.

**Concise:** If members depart from established procedures, their membership may be terminated by the Board. (Ding, 2021)

**Wordy:** Employability actually depends on certain factors that basically involve generic skills, such as ability to communicate, as much as any particular technical disciplinary knowledge.

**Concise:** Employability depends on generic skills, such as ability to communicate, as much as disciplinary knowledge. (Ding, 2021)

**Wordy:** Going forward, it is recommended that such kinds of issues be considered in the future planning process.

**Concise:** It is recommended that such issues be considered in the planning process. (Ding, 2021)

**Wordy:** It is interesting to note that the fascinating creature called the common poorwill is actually known to hibernate in the wintertime, going into a deep sleep during the coldest months of the year.

**Concise:** Common poorwills hibernate in the winter. (Middlebury)

**Wordy:** Both of the two samples had very similar concentrations.

**Concise:** The two samples had similar concentrations. (Middlebury)

**Wordy:** The results suggest that it may be possible to start to show how lasers may be used in such a way.

**Concise:** The results suggest how lasers may be used in this way. (Middlebury)

**Wordy:** An experiment helps elucidate the transition of charge carriers from polaronic metal states to insulating ordered states.

**Concise:** Charge carriers can transition from polaronic metal states to insulating ordered states. (Middlebury)

**Wordy:** Unfortunately, inferred mass changes using the gravity field solutions obtained by the groups we previously mentioned do not agree to a level that is considered truly acceptable.

**Concise:** Inferred mass changes using the gravity field solutions obtained by aforementioned groups do not agree to an acceptable level. (Middlebury)

**Wordy:** At some point in the future, the incredible field of research known as molecular dynamics simulations could be used in this way for use with plant DNA and nanoparticles to potentially provide an insight into changes observed here in plant health and output.

**Concise:** Molecular dynamics simulations of plant DNA and nanoparticles could provide an insight into changes observed in plant health and output. (Middlebury)

**Wordy:** It is interesting to note that our results show that the topological states are remarkably robust and that their dispersion has the capacity to be tuned in the range that we explored here ( $m=0-3$ ;  $n=1$ ) as well as in bulk Sb.

**Concise:** Our results show that the topological states are remarkably robust and that their dispersion can be tuned in the explored range ( $m=0-3$ ;  $n=1$ ) and in bulk Sb. (Middlebury)

**Wordy:** Experiments performed using reverse transcriptase-polymerase chain reaction obviously demonstrated that the hTRT mRNA originated from the cDNA that had been transfected and not the endogenous gene.

**Concise:** Reverse transcriptase-polymerase chain reaction experiments demonstrated that the hTRT mRNA originated from the transfected cDNA and not the endogenous gene. (Middlebury)

**Wordy:** The stepmother's house was cleaned by Cinderella.

**Concise:** Cinderella cleaned the stepmother's house. (Berkeley)

**Wordy:** The stepsisters were jealous and envious.

**Concise:** The stepsisters were jealous. **OR** The stepsisters were envious. (Berkeley)

**Wordy:** The mystery lady was one who every eligible man at the ball admired.

**Concise:** Every eligible man at the ball admired the mystery lady. (Berkeley)

**Wordy:** The research of Yuan et al. (2007) on sustainable architecture in Singapore is considered to be the cream of the crop.

**Concise:** The research of Yuan et al. (2007) on sustainable architecture in Singapore is considered to be the best. (National University of Singapore)

**Wordy:** The veteran researcher has churned out many articles in recent years.

**Concise:** The veteran researcher has produced many articles in recent years. (National University of Singapore)

**Wordy:** The team that was hurriedly put together has not been productive because the members do not share common objectives.

**Concise:** The team that was hurriedly assembled has not been productive because the members do not share common objectives. (National University of Singapore)

**Wordy:** In his attempt to establish absolute control, the dictator sought to wipe out all who were opposed to his rule.

**Concise:** In his attempt to establish absolute control, the dictator sought to eliminate all who were opposed to his rule. (National University of Singapore)

**Wordy:** The auditors' report suggests that the treasurer had tried to cover up the financial irregularities.

**Concise:** The auditors' report suggests that the treasurer had tried to hide the financial irregularities. (National University of Singapore)

**Wordy:** We must be prepared for discomfort in various sectors if we want to bring about change in the system.

**Concise:** We must be prepared for discomfort in various sectors if we want to effect change in the system. (National University of Singapore)

**Wordy:** In the following, I will argue that there is a need for alternative punishments.

**Concise:** The following will argue that there is a need for alternative punishments. (Kuleuven and Sciences)

**Wordy:** I think the potential mismatch is particularly important.

**Concise:** The potential mismatch is particularly important. (Kuleuven and Sciences)

**Wordy:** I find it surprising that these reasons were completely neglected.

**Concise:** Surprisingly, these reasons were completely neglected. (Kuleuven and Sciences)

**Wordy:** This is the basic background on which he bases his thinking on popular music.

**Concise:** He based his thinking on popular music on the aforementioned theories. (Kuleuven and Sciences)

**Wordy:** It is believed by the candidate that a ceiling must be placed on the budget by Congress.

**Concise:** The candidate believes that Congress must place a ceiling on the budget. (Wisconsin)

**Wordy:** The man was bitten by the dog.

**Concise:** The dog bit the man. (Wisconsin)

**Wordy:** The establishment of a different approach on the part of the committee has become a necessity.

**Concise:** The committee has to approach it differently. (Wisconsin)

**Wordy:** An evaluation of the procedures needs to be done.

**Concise:** We need to evaluate the procedures. (Wisconsin)

**Wordy:** The procedures need to be evaluated.

**Concise:** We need to evaluate the procedures. (Wisconsin)

**Wordy:** The stability and quality of our financial performance will be developed through the profitable execution of our existing business, as well as the acquisition or development of new businesses.

**Concise:** We will improve our financial performance not only by executing our existing business more profitably but by acquiring or developing new businesses. (Wisconsin)

**Wordy:** In a situation in which a class is over-enrolled, you may request that the instructor force-add you.

**Concise:** When a class is overenrolled, you may ask the instructor to force-add you. (Wisconsin)

**Wordy:** I will now make a few observations concerning the matter of contingency funds.

**Concise:** I will now make a few observations about contingency funds. (Wisconsin)

**Wordy:** The obvious effect of such a range of reference is to assure the audience of the author's range of learning and intellect.

**Concise:** The wide-ranging references in this talk assure the audience that the author is intelligent and well-read. (Wisconsin)

**Wordy:** It is a matter of the gravest possible importance to the health of anyone with a history of a problem with disease of the heart that he or she should avoid the sort of foods with a high percentage of saturated fats.

**Concise:** Anyone with a history of heart disease should avoid saturated fats. (Wisconsin)

**Wordy:** It was her last argument that finally persuaded me.

**Concise:** Her last argument finally persuaded me. (Wisconsin)

**Wordy:** There are likely to be many researchers raising questions about this methodological approach.

**Concise:** Many researchers are likely to raise questions about this methodological approach. (Wisconsin)

**Wordy:** It is inevitable that oil prices will rise.

**Concise:** Oil prices will inevitably rise. (Wisconsin)

**Wordy:** Consumer demand is rising in the area of services.

**Concise:** Consumers are demanding more services. (Wisconsin)

**Wordy:** Strong reading skills are an important factor in students' success in college.

**Concise:** Students' success in college depends on their reading skills. (Wisconsin)

**Wordy:** MHS has a hospital employee relations improvement program.

**Concise:** MHS has a program to improve relations among employees. (Wisconsin)

**Wordy:** The magazines that are on the table belong to me.

**Concise:** The magazines on the table belong to me. (George Mason University, 2021a)

**Wordy:** Students who are living on campus will receive a refund.

**Concise:** Students living on campus will receive a refund. (George Mason University, 2021a)

**Wordy:** The scholar who had been nominated for the award published another article.

**Concise:** The scholar nominated for the award published another article. (George Mason University, 2021a)

**Wordy:** On domestic flights that last at least three hours, a meal is served.

**Concise:** On domestic flights lasting at least three hours, a meal is served. (George Mason University, 2021a)

**Wordy:** The project is one of complexity.

**Concise:** It is a complex project. (City University of Hong Kong)

**Wordy:** IT assisted in the maintenance of the database.

**Concise:** IT helped to maintain the database. (City University of Hong Kong)

**Wordy:** Everyone's co-operation is of vital importance.

**Concise:** It's very important for everyone to co-operate. (City University of Hong Kong)

**Wordy:** The Equal Opportunities Commission (EOC) is responsible for the implementation of anti-discrimination legislation.

**Concise:** The Equal Opportunities Commission (EOC) is responsible for implementing anti-discrimination legislation. (City University of Hong Kong)

**Wordy:** We have conducted an investigation and arrived at the conclusion.

**Concise:** We have investigated and concluded. (City University of Hong Kong)

**Wordy:** I have made some enquiries.



**Concise:** I have enquired. (City University of Hong Kong)

**Wordy:** We are making arrangements.

**Concise:** We are arranging. (City University of Hong Kong)

**Wordy:** We are in receipt of your proposal dated 26 January.

**Concise:** We have received your proposal of 26 January. (City University of Hong Kong)

**Wordy:** Upon completion of the tendering process, the project can be awarded to the successful bidder.

**Concise:** When the tendering process is completed, we will award the project to the successful bidder. (City University of Hong Kong)

**Wordy:** Arrangements have been made to make the payment to you next Monday.

**Concise:** We will pay you next Monday. (City University of Hong Kong)

**Wordy:** In order to facilitate the implementation of the new strategic plan, we require the assistance of either one or two experienced specialists.

**Concise:** To implement the new plan, we need two specialist staff. (City University of Hong Kong)

**Wordy:** Consuello Calvin, our Chief Consultant, suggested at our last board meeting the installation of new software to enhance security protection.

**Concise:** At our last board meeting, Chief Consultant Consuello Calvin suggested that we install new security protection software. (City University of Hong Kong)

**Wordy:** I am currently engaged in a study of the target market.

**Concise:** I am studying the target market at the moment. (City University of Hong Kong)

**Wordy:** We didn't renew the contract with our supplier on account of the fact that it was necessary for us to find a cheaper supplier.

**Concise:** We didn't renew the contract with our supplier because we had to find a cheaper one. (City University of Hong Kong)

**Wordy:** It is important that you read the notes,

advice and information detailed opposite then complete the form overleaf (all sections) prior to its immediate return to the bank by way of the envelope provided.

**Concise:** Please read the attached information and complete and return the form. (City University of Hong Kong)

**Wordy:** In the event that there is a fire on the premises, it is vitally important that you shall leave the premises as soon as you hear the alarm bell ringing.

**Concise:** If you hear the fire alarm, please leave the building. (City University of Hong Kong)

**Wordy:** My team of staff and I are committed to maintaining and the promotion of Hong Kong as a major international financial centre.

**Concise:** My team of staff and I are committed to maintaining and promoting Hong Kong as a major international financial centre. (City University of Hong Kong)

**Wordy:** Thomas Jefferson's support of the new Constitution was documented in a letter to James Madison.

**Concise:** Thomas Jefferson documented his support of the new Constitution in a letter to James Madison. (YALE-NUS College)

**Wordy:** It is the combination of these two elements that makes the argument weak.

**Concise:** The combination of these two elements weakens the argument. (YALE-NUS College)

**Wordy:** The reason that General Lee invaded Pennsylvania in June 1863 was to draw the Army of the Potomac away from Richmond.

**Concise:** General Lee invaded Pennsylvania in June 1863 to draw the Army of the Potomac away from Richmond. (YALE-NUS College)

**Wordy:** Tom Jones is a novel by Fielding that comically portrays English society in the eighteenth century.

**Concise:** Fielding's novel Tom Jones comically portrays English society in the eighteenth century. (YALE-NUS College)

**Wordy:** In Crew's argument there are many indications of her misunderstanding of natural selec-

tion.

**Concise:** Crew's argument repeatedly demonstrates misunderstanding of natural selection. (YALE-NUS College)

**Wordy:** In the original state constitution, they allowed polygamy.

**Concise:** The original state constitution allowed polygamy. (YALE-NUS College)

**Wordy:** Each student must meet his or her advisor.

**Concise:** Students must meet with their advisors. (YALE-NUS College)

**Wordy:** The majority opinion contains a discussion of legislative history.

**Concise:** The majority opinion discusses legislative history. (University of Virginia, 2021)

**Wordy:** If you find yourself swimming in the ocean, be wary of sharks.

**Concise:** Be wary of sharks when swimming in the ocean. (Hotaling, 2020)

**Wordy:** We conducted an investigation of the accident.

**Concise:** We investigated the accident. (Naval Postgraduate School, 2021b)

**Wordy:** In each picture, the responses are shown.

**Concise:** Each picture shows the responses. (Naval Postgraduate School, 2021b)

**Wordy:** It has been found experimentally that genetically altered strawberries are frost-resistant.

**Concise:** In this experiment, we found that genetically altered strawberries are frost-resistant. (Naval Postgraduate School, 2021b)

**Wordy:** Indirect predator control is the exclusion of predators through means.

**Concise:** Indirect predator control excludes predators through means. (Naval Postgraduate School, 2021b)

**Wordy:** The increasing electrical output requires the addition of extra modules.

**Concise:** The increasing electrical output requires adding extra modules. (Naval Postgraduate School, 2021b)

**Wordy:** Early childhood thought disorders misdiagnosis often occurs as a result of unfamiliarity with recent research literature describing such conditions.

**Concise:** Physicians unfamiliar with the literature on recent research often misdiagnose disordered thought in young children. (Naval Postgraduate School, 2021b)

**Wordy:** There are several advantages to genetic screening.

**Concise:** Genetic screening presents several advantages. (Naval Postgraduate School, 2021b)

**Wordy:** There has been a lot of research done to determine its causes.

**Concise:** Much research has been done to determine its causes. (Naval Postgraduate School, 2021b)

**Wordy:** There were many factors that affected this situation.

**Concise:** Many factors affected this situation. (Naval Postgraduate School, 2021b)

**Wordy:** It is recommended that we complete more research.

**Concise:** We should complete more research. (Naval Postgraduate School, 2021b)

**Wordy:** It is our goal to serve the university community.

**Concise:** Our goal is to serve the university community. (Naval Postgraduate School, 2021b)

**Wordy:** The new regulations could cause problems for both the winners and for those who lose.

**Concise:** The new regulations could cause problems for both winners and losers. (Naval Postgraduate School, 2021b)

**Wordy:** Everyone should be cognizant of the danger of explosion.

**Concise:** Everyone should be aware of the danger of explosion. (Naval Postgraduate School, 2021b)

**Wordy:** Utilization of crystal clear goals and objectives will optimize our capacity to prioritize our concerns so that we will impact upon the major thrust of our company's future plans and prospects.

**Concise:** If we clarify our goals and objectives,

we will be better able to concentrate on what is most important for our company's future. (Naval Postgraduate School, 2021b)

**Wordy:** After a time interval of one to two minutes, the tone usually stops.

**Concise:** After one to two minutes, the tone usually stops. (Naval Postgraduate School, 2021b)

**Wordy:** Another activity that I would use my computer for is the wordprocessing software package.

**Concise:** I would also use my computer for wordprocessing. (Naval Postgraduate School, 2021b)

**Wordy:** In response to the issue of equality for educational and occupational mobility, it is my belief that a system of gender inequality exists in the school system.

**Concise:** I believe that gender inequality exists in the schools. (University of Massachusetts Amherst)

**Wordy:** The human immune system is responsible not only for the identification of foreign molecules, but also for actions leading to their immobilization, neutralization, and destruction.

**Concise:** The human immune system not only identifies foreign molecules, but also immobilizes, neutralizes, and destroys them. (Elliott)

**Wordy:** A numerical approach was devised that enables the fast and efficient determination of the ternary diagrams associated with our Gibbs free energy.

**Concise:** A new numerical approach quickly and efficiently determines the ternary diagrams associated with our Gibbs free energy. (Elliott)

**Wordy:** Generally, a storage ring is used not only to store charged particles, but also to define their energy and trajectory.

**Concise:** Generally, a storage ring not only stores charged particles but also defines their energy and trajectory. (Elliott)

**Wordy:** There were several methods used to produce the thin metal substrates - hot stamping, cold rolling, and cleaving.

**Concise:** Thin metal substrates were produced by several methods - hot stamping, cold rolling,

and cleaving. (Elliott)

**Wordy:** In the future, please turn in assignments on time, by or on the deadline.

**Concise:** Please turn in assignments on time. (University of BORÅS)

**Wordy:** I finished my math and science homework while I was in study hall.

**Concise:** I finished my math and science homework in study hall. (University of BORÅS)

**Wordy:** We outlined the letters for the banner in a careful way.

**Concise:** We outlined the letters for the banner carefully. (University of BORÅS)

**Wordy:** Use a diminutive word, please.

**Concise:** Use a small word, please. (University of BORÅS)

**Wordy:** The man was seen by the cat resting on the window.

**Concise:** The cat resting on the window saw the man. (Arkansas State University)

**Wordy:** When I went over to the meadow, I picked up some flowers and then placed the flowers inside of a vase at my grandmother's house.

**Concise:** I placed flowers in a vase at my grandmother's house that I picked from a meadow. (Arkansas State University)

**Wordy:** He went to lie down on the bed.

**Concise:** He lay on the bed. (Arkansas State University)

**Wordy:** The fact that the cat had a sweet personality factored into why I decided to adopt her.

**Concise:** I adopted the cat because she had a sweet personality. (Arkansas State University)

**Wordy:** She used things like examples to convey her message.

**Concise:** She used examples to convey her message. (Arkansas State University)

**Wordy:** It was found that after the main shock, several smaller movements continued to occur.

**Concise:** Several smaller movements continued to occur after the main shock. (University of Adelaide)

**Wordy:** It was not until after the last batch of votes was counted, that victory could be declared by the Senator.

**Concise:** The Senator declared victory after the last batch of votes was counted. (University of Adelaide)

**Wordy:** The warning system promulgated its message just minutes before the tsunami struck.

**Concise:** The warning system was activated just minutes before the tsunami struck. (University of Adelaide)

**Wordy:** This essay discusses the successes of Japan's Disaster Risk Management (DRM) system, as well as the ways in which that system could be improved.

**Concise:** This essay discusses the successes of Japan's Disaster Risk Management (DRM) system, and how that system could be improved. (University of Adelaide)

**Wordy:** As mentioned earlier, Japan's DRM system could be improved.

**Concise:** Japan's DRM system could be improved. (University of Adelaide)

**Wordy:** In my opinion, it is important that all college students participate in the electoral process by casting their vote.

**Concise:** All college students should vote. (San Jose State University)

**Wordy:** Actually, Mary kind of glanced at Bob when she realized they had basically lost the battle.

**Concise:** Mary glanced at Bob when she realized they had lost the battle. (San Jose State University)

**Wordy:** The future plan Congress will propose to completely overhaul the healthcare system could negatively frustrate constituents.

**Concise:** The plan Congress will propose to overhaul the healthcare system could frustrate constituents. (San Jose State University)

**Wordy:** When I asked her about the new job, she sort of looked at me with anger and basically did not reply.

**Concise:** When I asked her about the new job, she looked at me with anger and did not reply. (San Jose State University)

**Wordy:** Now that Bob has truly been fired, appealing to the CEO is kind of useless.

**Concise:** Now that Bob has been fired, appealing to the CEO is useless. (San Jose State University)

**Wordy:** Each individual will receive a free gift during the ceremony.

**Concise:** Each individual will receive a gift during the ceremony. (San Jose State University)

**Wordy:** Committee members first began by discussing the new marketing plan; then they presented the true facts about foreign imports from Belgium.

**Concise:** Committee members first discussed the new marketing plan; then they presented the facts about imports from Belgium. (San Jose State University)

**Wordy:** Anthropologists really believe these old fossils are absolutely crucial to uncovering our past history.

**Concise:** Anthropologists believe these fossils are crucial to uncovering our history. (San Jose State University)

**Wordy:** The zombies' feast of the survivors occurred.

**Concise:** The zombies feasted on the survivors. (University of Nevada)

**Wordy:** In this passage is an example of the use of the rule of justice in argumentation.

**Concise:** This passage exemplifies argumentation using the rule of justice. (University of Richmond)

**Wordy:** The point I wish to make is that fish sleep with their eyes open.

**Concise:** Fish sleep with their eyes open. (University of Richmond)

**Wordy:** Burning books is considered censorship by some people.

**Concise:** Some people consider burning books censorship. (University of Richmond)

**Wordy:** The theory of relativity isn't demonstrated by this experiment.

**Concise:** This experiment does not demonstrate the theory of relativity. (University of Richmond)

**Wordy:** For the most part, individuals in graduate classes are appreciative of conciseness.

**Concise:** Graduate students generally appreciate conciseness. (University of New England, 2020)

**Wordy:** Superintendents will be interviewed by the teachers they work for.

**Concise:** Teachers will interview their superintendents. (University of New England, 2020)

**Wordy:** The success of the pilot program is reflected in the number of children in elementary school who are healthy.

**Concise:** The number of healthy elementary students reflects the pilot program's success. (University of New England, 2020)

**Wordy:** Improvements in your writing will be seen if you remove prepositional phrases that aren't necessary.

**Concise:** Removing unnecessary prepositional phrases will improve your writing. (University of New England, 2020)

**Wordy:** Write a biographical essay of your life.

**Concise:** Write a biography. (University of New England, 2020)

**Wordy:** Reach a consensus of opinion with your group members.

**Concise:** Reach a consensus with your group members. (University of New England, 2020)

**Wordy:** To get started with your reflective writing assignment, imagine a mental picture of a time when you found learning to be extremely difficult.

**Concise:** As you begin your reflection, remember a time when learning was difficult. (University of New England, 2020)

**Wordy:** As you complete the analysis, be keep in mind the methods and procedures that direct the processes of our judicial system.

**Concise:** As you complete the analysis, consider the common processes of the judiciary. (University of New England, 2020)

**Wordy:** Your assigned reading for the course will describe many of the problems and mistakes that can make projects more difficult for students than they need to be.

**Concise:** Your assigned course reading de-

scribes many project pitfalls students may encounter. (University of New England, 2020)

**Wordy:** The brief was read by us.

**Concise:** We read the brief. (Georgetown University)

**Wordy:** The evidence was suppressed by the court.

**Concise:** The court suppressed the evidence. (Georgetown University)

**Wordy:** The holding was reached by the court.

**Concise:** The court held. (Georgetown University)

**Wordy:** The argument was presented by the plaintiff.

**Concise:** The plaintiff argued. (Georgetown University)

**Wordy:** A complaint was filed by the union.

**Concise:** The union filed the complaint. (Georgetown University)

**Wordy:** Our conclusion is supported by legislative history.

**Concise:** Legislative history supports our conclusion. (Georgetown University)

**Wordy:** It is possible for the court to modify the judgment.

**Concise:** The court can modify the judgment. (Georgetown University)

**Wordy:** The implementation of the plan by the team was successful.

**Concise:** The team successfully implemented the plan. (Georgetown University)

**Wordy:** There was an affirmative decision for expansion by the administration.

**Concise:** The administration decided to expand the program. (Georgetown University)

**Wordy:** A revision of the program will result in increases of efficiency to our clients.

**Concise:** If we revise the program, we can serve clients more efficiently. (Georgetown University)

**Wordy:** The smoke that comes from factories that are situated in the valley pollutes the air.



**Concise:** The smoke from factories in the valley pollutes the air. (Brigham Young University)

**Wordy:** University students are required by the university to make payments of their tuition fees before the time of their registration.

**Concise:** University students are required to pay tuition before registering. (Brigham Young University)

**Wordy:** The match had been won by the world champion shortly after it started.

**Concise:** The world champion won the match shortly after it started. (Brigham Young University)

**Wordy:** The accident occurred due to the fact that there was nothing to prevent it.

**Concise:** The accident occurred because there was nothing to prevent it. (Brigham Young University)

**Wordy:** The nature of the crisis situation was such that it called for our immediate attention.

**Concise:** The crisis called for our immediate attention. (Brigham Young University)

**Wordy:** Upon reflection, I remembered eating bread and cheese at the reception.

**Concise:** I remembered eating bread and cheese at the reception. (Brigham Young University)

**Wordy:** In my opinion, in response to the issue of wordy sentences in college writing, it is my belief that a tool for revision is needed.

**Concise:** I believe college students need sentence revision strategies. (James Madison University)

**Wordy:** What I wish to show here is that James Madison University is a good representation of a place with many backgrounds and interests of the students.

**Concise:** James Madison University represents a diverse university. (James Madison University)

**Wordy:** The report is waiting for your approval.

**Concise:** The report awaits your approval. (IEEE)

**Wordy:** It is a matter of the gravest importance to the health of anyone who uses a microwave and has a heart condition to avoid standing in front of

the microwave while it is running.

**Concise:** Anyone with a heart condition should avoid standing in front of an operating microwave oven. (IEEE)

**Wordy:** My sister is loud when she is telling her children to do their homework.

**Concise:** My sister bellows when telling her children to do their homework. (St. Louis Community College)

**Wordy:** The restaurant's food is excellent.

**Concise:** The restaurant serves excellent food. (St. Louis Community College)

**Wordy:** Jennifer Lawrence is the star of The Hunger Games.

**Concise:** Jennifer Lawrence stars in The Hunger Games. (St. Louis Community College)

**Wordy:** Our mother was the driver of the bus.

**Concise:** Our mother drove the bus. (St. Louis Community College)

**Wordy:** It is my intention to transfer to a four-year university.

**Concise:** I intend to transfer to a four-year university. (St. Louis Community College)

**Wordy:** There were some important findings resulting from this experiment.

**Concise:** This experiment resulted in some important findings. (St. Louis Community College)

**Wordy:** He struggled with the paper that was assigned by the professor.

**Concise:** He struggled with the paper assigned by the professor. (St. Louis Community College)

**Wordy:** Electric car technology was in existence as early as 1830.

**Concise:** Electric car technology existed as early as 1830. (St. Louis Community College)

**Wordy:** Negative advertising is influential on voters' perceptions of candidates.

**Concise:** Negative advertising influences voters' perceptions of candidates. (St. Louis Community College)

**Wordy:** I am in receipt of your letter.

**Concise:** I received your letter. (St. Louis Community College)

**Wordy:** The stock market was fluctuating wildly before the crash.

**Concise:** The stock market fluctuated wildly before the crash. (St. Louis Community College)

**Wordy:** The concept of immortality is intriguing to me.

**Concise:** The concept of immortality intrigues me. (St. Louis Community College)

**Wordy:** In reviewing the notes of his lecture, he referred back to what he had written before class.

**Concise:** He reviewed his lecture notes. (Collins)

**Wordy:** There are four employees who have filed grievances.

**Concise:** Four employees have filed grievances. (Collins)

**Wordy:** It is our suspicion that the basement was substandard.

**Concise:** We suspect the basement was substandard. (Collins)

**Wordy:** What we need to do next is simplify our sign-off procedure.

**Concise:** Next, we need to simplify our sign-off procedure. (Collins)

**Wordy:** Make a revision of this sentence.

**Concise:** Revise this sentence. (Collins)

**Wordy:** We would like to call your attention and to the attention of others in your office to the fact that your report is overdue because the deadline was last Friday.

**Concise:** We remind you that your report is overdue. (Palomar Community College)

**Wordy:** The document that you refer back to is not included in the sample documents that go to make up the enclosure.

**Concise:** The document is not included in the samples. (Palomar Community College)

**Wordy:** The purpose of this memo is to provide a reference for all your staff members of the formats of various documents that go forward by transmission to headquarters.

**Concise:** This memo describes the formats for documents going to headquarters. (Palomar Community College)

munity College)

**Wordy:** The need for reports that have logic and are relevant is still great.

**Concise:** We need logical, relevant reports. (Palomar Community College)

**Wordy:** Your statement in your letter that has the contention that the information submitted and sent to you by us contained certain inaccuracies and errors has prompted us to embark on a careful and thorough reevaluation of the information submitted, with the result that the original informative data has been determined to be accurate and correct in all instances and aspects of the information.

**Concise:** As you suggested, we have checked our information and confirmed its accuracy. (Palomar Community College)

**Wordy:** In the event that some information concerning Mr. Smith should be brought to your attention, it should be forwarded via mail or courier or telephone to us in view of the possibility that the information may reveal any attempt on the part of Mr. Smith to depart from the United States.

**Concise:** If you get any information about Mr. Smith, please contact us in case he tries to leave the country. (Palomar Community College)

**Wordy:** Sometimes it is not easy to avoid the dummy subject.

**Concise:** Sometimes the dummy subject is not easily avoided. (Loyola University Chicago)

**Wordy:** She fell down due to the fact that she hurried.

**Concise:** She fell because she hurried. (Loyola University Chicago)

**Wordy:** The resolution to the problem can be seen in author's attempt.

**Concise:** The author resolves the problem. (Loyola University Chicago)

**Wordy:** His objective was to win, but playing fair also mattered to him.

**Concise:** His objective was not only to win, but also to play fair. (Loyola University Chicago)

**Wordy:** The author shows the reader the path to being virtuous rather than to vice.

**Concise:** The author shows the reader the path

to virtue rather than to vice. (Loyola University Chicago)

**Wordy:** Both Smith and Jones took different views of the war.

**Concise:** Smith and Jones took different views of the war. (Loyola University Chicago)

**Wordy:** Both Smith and Jones took the same view of the war.

**Concise:** Smith and Jones took the same view of the war. (Loyola University Chicago)

**Wordy:** For his young readers, the author must avoid intimidating them by taking too much for granted.

**Concise:** The author must avoid intimidating young readers by taking too much for granted. (Loyola University Chicago)

**Wordy:** It was earlier demonstrated that heart attacks can be caused by high stress.

**Concise:** Researchers earlier showed that high stress can cause heart attacks. (?)

**Wordy:** It is imperative that we find a solution.

**Concise:** We must find a solution. (Houston Community College, 2016)

**Wordy:** As far as I am concerned, discrimination against certain ethnic groups continues to exist for all intents and purposes.

**Concise:** Discrimination against certain ethnic groups continues to exist. (College of San Mateo)

**Wordy:** At this point in time, the latest iPad is expensive due to the fact that it has no competition.

**Concise:** Now, the new iPad is expensive because it has no competition. (College of San Mateo)

**Wordy:** The reason why Jhumpa Lahiri's novel is so great is because it has vivid imagery.

**Concise:** Jhumpa Lahiri's novel is great because it has vivid imagery. (College of San Mateo)

**Wordy:** A healthy lifestyle enhances your ability both to live life to its fullest and to live to a ripe old age.

**Concise:** A healthy lifestyle helps you live life fully and longer. (College of San Mateo)

**Wordy:** Past history shows that the students who

transfer are actually very few in number.

**Concise:** History shows that the students who transfer are actually very few. (College of San Mateo)

**Wordy:** President George W. Bush made serious errors in responding to the sudden crisis that followed the terrible tragedy of September 11.

**Concise:** President George W. Bush made serious errors in responding to the crisis that followed the tragedy of September 11. (College of San Mateo)

**Wordy:** I think that basically we need to use fewer words, or our papers will really be much too long.

**Concise:** We need to use fewer words, or our papers will be too long. (Ursinus)

**Wordy:** Due to the fact that Ursula babysat every Thursday evening, she could not attend Michael's recital.

**Concise:** Ursula babysat every Thursday evening, she could not attend Michael's recital. (Lake Forest College)

**Wordy:** The committee's first and foremost goal is to strategize ways to eliminate excess spending.

**Concise:** The committee's foremost goal is to strategize ways to eliminate excess spending. (Lake Forest College)

**Wordy:** Do not write in the negative.

**Concise:** Write in the affirmative. (Lake Forest College)

**Wordy:** Not many parishioners commented that Father Donnelly does not have the same charisma as Father Marks.

**Concise:** Few parishioners commented that Father Donnelly lacks Father Marks' charisma. (Lake Forest College)

**Wordy:** There were many students at the lecture.

**Concise:** Many students attended the lecture. (University of Calgary)

**Wordy:** The patient's condition was very unstable.

**Concise:** The patient's condition was unstable. (University of Calgary)

**Wordy:** The author does an analysis of the problem.

**Concise:** The author analyzes the problem. (University of Calgary)

**Wordy:** In my opinion, one of the most important steps of the learning process is understanding how the learning process happens.

**Concise:** One of the most important steps of the learning process is understanding how it happens. (University of Calgary)

**Wordy:** In my opinion, the role of nurse practitioner (NP) should be introduced to more clinics since NPs can perform many of the tasks assumed by physicians.

**Concise:** The role of nurse practitioner (NP) should be introduced to more clinics since NPs can perform many of the tasks assumed by physicians. (University of Calgary)

**Wordy:** They did not succeed in reviving the patient.

**Concise:** They failed to revive the patient. (University of Calgary)

**Wordy:** They were not successful in reviving the patient.

**Concise:** They failed to revive the patient. (University of Calgary)

**Wordy:** Unencumbered by a sense of responsibility, Jason left his new leather jacket on the bus.

**Concise:** Jason irresponsibly left his new leather jacket on the bus. (Touro College)

**Wordy:** There is a unique, eccentric, and opposite way to accomplish this burdensome task.

**Concise:** There is an unusual way to complete this task. (Indiana Tech)

**Wordy:** I really enjoy sourdough bread.

**Concise:** I enjoy sourdough bread. (Indiana Tech)

**Wordy:** She basically said no to me.

**Concise:** She said no to me. (Indiana Tech)

**Wordy:** The gift was received by James.

**Concise:** James received the gift. (Indiana Tech)

**Wordy:** Productivity actually depends on cer-

tain factors that basically involve psychology more than any particular technology.

**Concise:** Productivity depends on psychology more than on technology. (University of Alberta)

**Wordy:** She proposed various and sundry explanations for the procedure.

**Concise:** She proposed various explanations for the procedure. (University of Alberta)

**Wordy:** Their software programs demonstrated and showed that many companies and businesses could benefit and profit from eliminating unnecessary overhead and expenses.

**Concise:** Their software showed that companies could profit from eliminating unnecessary overhead. (University of Alberta)

**Wordy:** Do not try to predict those future events that will completely revolutionize society, because past history shows that it is the final outcome of minor events that unexpectedly surprises us more.

**Concise:** Do not try to predict revolutionary events, because history shows that the outcome of minor events surprises us more. (University of Alberta)

**Wordy:** In the event that you finish early, contact this office.

**Concise:** If you finish early, contact the office. (University of Alberta)

**Wordy:** There is a need for more careful inspections of all welds.

**Concise:** You must inspect all welds more carefully. (University of Alberta)

**Wordy:** By the time she got home, Merdine was very tired.

**Concise:** By the time she got home, Merdine was exhausted. (University of Alberta)

**Wordy:** She was also really hungry.

**Concise:** She was also hungry. (University of Alberta)

**Wordy:** The last point I would like to make is that in regard to men-women relationships, it is important to keep in mind that the greatest changes have occurred in how they work together.

**Concise:** Men and women have changed their relationships most in how they work together. (University of Alberta)

versity of Alberta)

**Wordy:** High divorce rates have been observed to occur in areas that have been determined to have low population density.

**Concise:** High divorce rates occur in areas with low population density. (University of Alberta)

**Wordy:** This section introduces another problem, that of noise pollution.

**Concise:** Another problem is noise pollution. (University of Alberta)

**Wordy:** The church, which was completed in 1875, dominated the skyline.

**Concise:** Completed in 1875, the church dominated the skyline. (University of Evansville)

**Wordy:** The man, who was intelligent, built a time machine.

**Concise:** The intelligent man built a time machine. (University of Evansville)

**Wordy:** There are twelve children who would like ice cream.

**Concise:** Twelve children would like ice cream. (University of Evansville)

**Wordy:** It is he who stole the car.

**Concise:** He stole the car. (University of Evansville)

**Wordy:** Brother Edward is now employed at a private rehabilitation center working as a certified physical therapist.

**Concise:** Brother Edward works at a private rehabilitation center as a certified physical therapist. (Liberty university)

**Wordy:** Sally was determined in her mind to lose weight.

**Concise:** Sally was determined to lose weight. (Liberty university)

**Wordy:** Thirty-somethings are often thought of or stereotyped as apathetic.

**Concise:** Thirty-somethings are often stereotyped as apathetic. (Liberty university)

**Wordy:** Our fifth patient, in room six, is a mentally ill patient.

**Concise:** Our fifth patient, in room six, is mentally ill. (Liberty university)

**Wordy:** The best instructors help each student to become a better student both academically and emotionally.

**Concise:** The best instructors help each student grow both academically and emotionally. (Liberty university)

**Wordy:** In my opinion, our current tax policy is misguided.

**Concise:** Our current tax policy is misguided. (Liberty university)

**Wordy:** It certainly seems that The Telltale Heart is Edgar Allen Poe's most macabre story.

**Concise:** The Telltale Heart is Edgar Allen Poe's most macabre story. (Liberty university)

**Wordy:** I will file the proper papers in the event that I am unable to meet the deadline.

**Concise:** I will file the proper papers if I cannot meet the deadline. (Liberty university)

**Wordy:** The investment analyst claimed that because of volatile market conditions, he could not make an estimate of the company's future profits.

**Concise:** The investment analyst claimed that because of volatile market conditions, he could not estimate the company's future profits. (Liberty university)

**Wordy:** Mervina is responsible for monitoring and balancing the budgets for travel, contract services, and personnel.

**Concise:** Mervina monitors and balances the budgets for travel, contract services, and personnel. (Liberty university)

**Wordy:** There is another book that tells the story of Karl Marx and explains his theory of socialism.

**Concise:** Another book tells the story of Karl Marx and explains his theory of socialism. (Liberty university)

**Wordy:** All too often, athletes with minimal academic skills have been recruited by our coaches.

**Concise:** All too often, our coaches have recruited athletes with minimal academic skills. (Liberty university)

**Wordy:** My family took a side trip to Monticello, which was the home of Thomas Jefferson.

**Concise:** My family took a side trip to Monti-



cello, the home of Thomas Jefferson. (Liberty university)

**Wordy:** For her birthday we gave Harriet a stylish vest made out of silk.

**Concise:** For her birthday we gave Harriet a stylish silk vest. (Liberty university)

**Wordy:** The pizza was eaten by the students.

**Concise:** The students ate the pizza. (Hazelwood, 2017)

**Wordy:** The attorney made an investigation of the case.

**Concise:** The attorney investigated the case. (Hazelwood, 2017)

**Wordy:** The cause of our schools' failure at teaching basic skills is not understanding the influence of cultural background on learning.

**Concise:** Our schools have failed to teach basic skills because educators do not understand how cultural backgrounds influence learning. (Duke University)

**Wordy:** A revision of the program will result in increases in our efficiency in the servicing of our customers.

**Concise:** If we revise the program, we can serve our customers more efficiently. (Duke University)

**Wordy:** It was decided by the Director to expand the program.

**Concise:** The Director decided to expand the program. (Duke University)

**Wordy:** It is vital that we delete the word "absolutely."

**Concise:** We must delete the word "absolutely." (Duke University)

**Wordy:** There are five car alarms that are blaring in the parking lot.

**Concise:** Five car alarms are blaring in the parking lot. (Duke University)

**Wordy:** There are many engineers who like to write.

**Concise:** Many engineers like to write. (Iqbal)

**Wordy:** There are many ways in which we can arrange the pulleys.

**Concise:** We can arrange the pulleys in many ways. (Iqbal)

**Wordy:** The meeting happened on Monday.

**Concise:** The meeting happened Monday. (Iqbal)

**Wordy:** They agreed that it was true.

**Concise:** They agreed it was true. (Iqbal)

**Wordy:** George's wife is a woman who is unhappy because of the fact that George ignores her.

**Concise:** George's wife is unhappy because George ignores her. (Rambo, 2019)

**Wordy:** In this day and age, people are under the impression that it is important to express ideas in a concise manner.

**Concise:** Today, people think it is important to express ideas concisely. (Rambo, 2019)

**Wordy:** Hemingway conveys the idea that the setting of the story reflects the troubled relationship between George and his wife.

**Concise:** The setting of the story reflects the troubled relationship between George and his wife. (Rambo, 2019)

**Wordy:** If one looks at the painting carefully, one notices that there are dark clouds gathering over the mountains.

**Concise:** Dark clouds gather over the mountains. **OR** There are dark clouds gathering over the mountains. (Rambo, 2019)

**Wordy:** There are children that are playing near the base of the mountain.

**Concise:** Children are playing near the base of the mountain. (Rambo, 2019)

**Wordy:** There is a snow-capped mountain that appears on the left, and there are storm clouds that are gathering in the background.

**Concise:** A snow-capped mountain appears on the left, and storm clouds are gathering in the background. (Rambo, 2019)

**Wordy:** In the story "Cat in the Rain," the setting of the story reflects the troubled relationship between George and his wife in the story.

**Concise:** In the story "Cat in the Rain," the setting reflects the troubled relationship between

George and his wife. (Rambo, 2019)

**Wordy:** The gathering storm clouds appear threatening and ominous.

**Concise:** The gathering storm clouds appear threatening. **OR** The gathering storm clouds appear ominous. (Rambo, 2019)

**Wordy:** The gathering clouds are emphasized by the artist, but the approaching storm does not seem to be noticed by the children.

**Concise:** The artist emphasizes the gathering clouds, but the children do not seem to notice the approaching storm. (Rambo, 2019)

**Wordy:** The elephant is killed by Orwell even though the villagers are no longer threatened by it.

**Concise:** Orwell kills the elephant even though it no longer threatens the villagers. (Rambo, 2019)

**Wordy:** I think that George's wife is unhappy because George ignores her.

**Concise:** George's wife is unhappy because George ignores her. (Rambo, 2019)

**Wordy:** I believe that the storm clouds suggest the danger that, in my opinion, children sometimes ignore.

**Concise:** The storm clouds suggest the danger that children sometimes ignore. (Rambo, 2019)

**Wordy:** George's wife appears to be unhappy.

**Concise:** George's wife appears unhappy. (Rambo, 2019)

**Wordy:** The storm clouds appear to be dark and ominous, but the children seem to be unaware of the approaching storm.

**Concise:** The storm clouds appear dark and ominous, but the children seem unaware of the approaching storm. (Rambo, 2019)

**Wordy:** George is reading his book while his wife is looking out the window.

**Concise:** George reads his book while his wife looks out the window. (Rambo, 2019)

**Wordy:** Storm clouds are gathering over the mountains.

**Concise:** Storm clouds gather over the mountains. (Rambo, 2019)

**Wordy:** Rather than taking the bull by the horns,

she was quiet as a church mouse.

**Concise:** She avoided confrontation by remaining silent. (University of Waterloo, 2018)

**Wordy:** The bridge is unstable due to the fact that it was constructed with inferior material.

**Concise:** The bridge is unstable because it was constructed with inferior material. (University of Waterloo, 2018)

**Wordy:** All things considered, climate change should be given more attention, in my opinion.

**Concise:** Climate change should be given more attention. (University of Waterloo, 2018)

**Wordy:** Last but not least, researchers found several connections between the subjects.

**Concise:** Lastly, researchers found several connections between the subjects. (University of Waterloo, 2018)

**Wordy:** Historical context is an important factor to consider while writing literature reviews.

**Concise:** Historical context must be considered while writing literature reviews. (University of Waterloo, 2018)

**Wordy:** He received a wound from the clock while he wound it.

**Concise:** The clock injured him while he wound it. (University of Waterloo, 2018)

**Wordy:** He was right to assume his subjects are right-handed.

**Concise:** He correctly assumed his subjects are right-handed. (University of Waterloo, 2018)

**Wordy:** Subjects with little technical training tend to perform poorly due to their lack of technical experience.

**Concise:** Some subjects' lack of technical experience resulted in poor performance. (University of Waterloo, 2018)

**Wordy:** The reason she moved is because she was offered a better position.

**Concise:** She moved because she was offered a better position. (University of Waterloo, 2018)

**Wordy:** As already stated above, beluga whales use sounds and echolocation to hunt in dark or turbid waters.

**Concise:** As stated above, beluga whales use sounds and echolocation to hunt in dark or turbid waters. (University of Waterloo, 2018)

**Wordy:** It is challenging to read Shakespeare.

**Concise:** Reading Shakespeare is challenging. (University of Waterloo, 2018)

**Wordy:** It is significant that a study of ethics complaints against social workers found that half of these involved violation of professional boundaries.

**Concise:** Significantly, a study of ethics complaints against social workers found that half of these involved violations of professional boundaries. (University of Waterloo, 2018)

**Wordy:** The researchers conducted an investigation of the effects of caffeine on students writing timed examinations.

**Concise:** The researchers investigated the effects of caffeine on students writing timed examinations. (University of Waterloo, 2018)

**Wordy:** The teacher could understand why her students failed the test.

**Concise:** The teacher understood why her students failed the test. (University of Waterloo, 2018)

**Wordy:** The reaction was catalyzed by the introduction of light.

**Concise:** The introduction of light catalyzed the reaction. (University of Waterloo, 2018)

**Wordy:** The author's expostulation impugns literateurs of yore.

**Concise:** The author's argument disproves earlier scholars. (University of Waterloo, 2018)

**Wordy:** Measurements were taken of variations in pressure as function of temperature.

**Concise:** Pressure was measured as it varied with temperature. (Elliott)

**Wordy:** There is a prize in every box of Quacko cereal.

**Concise:** A prize is in every box of Quacko cereal. (University of Alberta)

**Wordy:** There are two security guards standing at the gate.

**Concise:** Two security guards stand at the gate. (University of Alberta)

More sentences from other sources.

## References

Virtual Writing Center Antioch University. [The paramedic method.](#)

Online Writing Center Arkansas State University. [Statement of purpose.](#)

Student Learning Center Berkeley. [Nine basic ways to improve your style in academic writing.](#)

Research & Writing Center Brigham Young University. [Concise writing.](#)

Center for Academic Success Butte College. [How to write clearly: Using precise and concise language.](#)

Student Academic Success Center Carnegie Mellon University. [Identify where your sentence is too wordy.](#)

UGC ICOSA Project City University of Hong Kong. [Concise writing – package 2.](#)

Writing Centers College of Saint Benedict & Saint John's University. [Writing concise sentences.](#)

The Writing Center College of San Mateo. [Tutorial 14: Writing concisely.](#)

Ross Collins. [Editorial processes.](#)

Commnet. [The guide to grammar and writing.](#)

Campbell Ding. 2021. [Be concise.](#)

Thompson Writing Program Duke University. [Revising for style: Clarity and conciseness.](#)

M Elliott, Celia. [Making verbs work.](#)

The Writing Center George Mason University. 2021a. [Using reduced relative clauses to write concisely.](#)

The Writing Center George Mason University. 2021b. [Writing concisely.](#)

Georgetown Law Georgetown University. [Concise is nice! an aid for writing.](#)

The Writing Center Hamilton College. [Writing resources - eliminating wordiness.](#)

Kristin J Hazelwood. 2017. Tips for writing concisely. *Kentucky Bench & Bar*, 81:37.

Scott Hotaling. 2020. [Simple rules for concise scientific writing.](#) *Limnology and Oceanography Letters*, 5(6):379–383.

Learning Web Houston Community College. 2016. [Clear concise writing.](#)

Professional Communication Society IEEE. [Write clearly and concisely.](#)

The Writing Center Indiana Tech. [Writing concisely](#).

Sajid Iqbal. [How to write scientific papers correctly, clearly, and concisely](#).

University Writing Center James Madison University. [\[link\]](#).

Faculty of Psychology Kuleuven and Educational Sciences. [Master's thesis portal](#).

The Writing Center Lake Forest College. [Writing concisely: Eliminating wordiness - forester.net](#).

Media Liberty university. [On writing concisely](#).

English Tutoring at the Literacy Center Loyola University Chicago. [Common writing problems & how to fix them](#).

Student Success Center Loyola University New Orleans. [Concision](#).

The Online Writing & Learning Link (OWLL) Massey University. [Writing concisely](#).

The Writing Center McDaniel College. [The paramedic method](#).

Middlebury. [Write like a scientist](#).

Writing Monash University. 2020. [Writing clearly, concisely and precisely](#).

Center for English Language Communication National University of Singapore. [Using appropriate words in an academic essay](#).

Graduate Writing Center Naval Postgraduate School. 2021a. [Concision](#).

JM Gay Naval Postgraduate School. 2021b. [The "paramedic method"](#).

Academic Technology department Palomar Community College. [Revision practice: Writing concisely](#).

Purdue Writing Lab Purdue University. [Concision](#).

Randy Rambo. 2019. [English composition 1](#).

Tutoring site Rowan College of South Jersey. [Paramedic method](#).

The Writing Center San Jose State University. [Writing concisely](#).

The Writing Center St. Louis Community College. [Replacing to be verbs](#).

Engineering Stanford University. [Writing style guide](#).

William Strunk. 1918. [Elementary principles of composition](#).

Writing Centers Texas A&M University. [Clear; concise writing](#).

Engineering The University of Iowa. [The reverse paramedic method](#).

The Graduate Writing Center The University of Rhode Island. 2019. [Concise writing: Tips and tricks](#).

The Writing Center Touro College. [Writing concise sentences](#).

The Writing Center University of Adelaide. [10 tips for cutting your word count](#).

Media Library University of Alberta. [Concise writing](#).

The Writing Center University of Arizona Global Campus. [Writing clearly; concisely](#).

Sam M. Walton College of Business University of Arkansas. [Concise writing](#).

The Writing Center University of Arkansas at Little Rock. [Some steps toward concise writing](#).

Högskolan i Borås University of BORÅS. [Writing concisely](#).

Learning Commons University of Calgary. [Writing style: Concise writing](#).

University Writing Center University of Central Florida. [Paramedic method](#).

The Writing Center University of Evansville. [Trimming the fat: The importance of conciseness](#).

Center For Academic Success University of Illinois Springfield. [Writing clear; concise sentences](#).

Library University of Leeds. 2017. [Academic writing](#).

Academics University of Massachusetts Amherst. [Lanham factor](#).

University writing speaking center University of Nevada, Reno. [Guidelines for clarity concision](#).

Online College of Graduate & Professional Studies University of New England. 2020. [Teaching online: 5 tips for concise writing](#).

The Writing Center University of North Carolina, Chapel Hill. 2021. [Writing concisely](#).

The Writing Center University of Richmond. [How to make sentences clear and concise](#).

School of Law University of Virginia. 2021. [4 tips to more concise legal writing](#).

Writing & Communication Centre University of Waterloo. 2018. [Writing concisely](#).

Ursinus. [Writing concisely center for writing and speaking - ursinus](#).

The Writing Center Walden University. [Scholarly voice: Writing concisely](#).

The Writing Center Wisconsin, University of Wisconsin Madison. [Improving your writing style.](#)

The Writing Center YALE-NUS College. [Hamilton college 7 deadly sins of writing.](#)
