# Supplementary material
Source: ML conference proceedings conference paper supplement (https://aclanthology.org/2022.tsar-1.6)
Supplement: dataset [file sac-na.xlsx]

## Sheet: Sheet1
	cite	wordy	concise	category	link
0	glatch_haecky_vargas_2020	The beach was visited by my wife.	['My wife visited the beach.']	1	https://writers.com/concise-writing
1	glatch_haecky_vargas_2020	We are being drenched by the rain.	['The rain is drenching us.']	3	https://writers.com/concise-writing
2	glatch_haecky_vargas_2020	The dog sat lazily on the couch.	['The dog rested on the couch. ', ' The dog relaxed on the couch. ', ' The dog lounged on the couch. ', ' The dog lazed on the couch.']	3	https://writers.com/concise-writing
3	glatch_haecky_vargas_2020	They drove past the red fire hydrant.	['They drove past the fire hydrant.']	1	https://writers.com/concise-writing
4	glatch_haecky_vargas_2020	We savored the cool creamy white-and-red strawberry milkshakes, an almost sinfully delicious relief on a sweltering midsummer July day.	['We enjoyed strawberry milkshakes in the July heat.']	2	https://writers.com/concise-writing
5	glatch_haecky_vargas_2020	My dragon has a tail that is very long and that stretches above my roof, and which could probably touch a passing jet if it was following a flight path which was passing low to the ground somewhere nearby us.	["My dragon's long tail stretches above my roof, and could probably touch a passing jet with a low flight plan."]	6	https://writers.com/concise-writing
6	glatch_haecky_vargas_2020	When he blew off our date, it only added fuel to the fire.	["I grew even angrier at him when he didn't show up for our date."]	3	https://writers.com/concise-writing
7	glatch_haecky_vargas_2020	Clandestinely, Jordan lamented being the school's cynosure.	["Secretly, Jordan regretted being the school's center of attention."]	5	https://writers.com/concise-writing
8	glatch_haecky_vargas_2020	My passion was all-consuming, surpassing, mind-numbing, a raging bonfire that engulfed the entire universe and collapsed all of reality into a single infinitely beguiling point: him.	['I felt overwhelming passion for him.']	3	https://writers.com/concise-writing
9	oxford_royale_academy_2021	In terms of Bronte's imagery, the author has some interesting observations.	["The author has some interesting observations about Bronte's imagery."]	5	https://www.oxford-royale.com/articles/clumsy-phrases-avoid/
10	oxford_royale_academy_2021	It was decided by the authorities that a curfew should be imposed.	['The authorities decided to impose a curfew.']	3	https://www.oxford-royale.com/articles/clumsy-phrases-avoid/
11	oxford_royale_academy_2021	It is important to note that not all scholars agree on this.	['Not all scholars agree on this.']	1	https://www.oxford-royale.com/articles/clumsy-phrases-avoid/
12	oxford_royale_academy_2021	The site was occupied by in excess of a hundred people.	['The site was occupied by over a hundred people.']	2	https://www.oxford-royale.com/articles/clumsy-phrases-avoid/
13	oxford_royale_academy_2021	The character had no idea whether or not she would be making the right choice.	['The character had no idea whether she would be making the right choice.']	1	https://www.oxford-royale.com/articles/clumsy-phrases-avoid/
