# Supplementary material
Source: ML conference proceedings conference paper supplement (https://aclanthology.org/2022.tsar-1.6)
Supplement: dataset [file sac.xlsx]

## Sheet: Sheet1
id	cite	wordy	concise	category	link
0	purdue_writing_lab_2021	The politician talked about several of the merits of after-school programs in his speech.	['The politician touted after-school programs in his speech.']	2	https://owl.purdue.edu/owl/general_writing/academic_writing/reverse_paramedic_method.html
1	purdue_writing_lab_2021	Suzie believed but could not confirm that Billy had feelings of affection for her.	['Suzie assumed that Billy adored her.']	2	https://owl.purdue.edu/owl/general_writing/academic_writing/reverse_paramedic_method.html
2	purdue_writing_lab_2021	Our Web site has made available many of the things you can use for making a decision on the best dentist.	['Our website presents criteria for determining the best dentist.']	2	https://owl.purdue.edu/owl/general_writing/academic_writing/reverse_paramedic_method.html
3	purdue_writing_lab_2021	Working as a pupil under someone who develops photos was an experience that really helped me learn a lot.	["Working as a photo technician's apprentice was an educational experience."]	2	https://owl.purdue.edu/owl/general_writing/academic_writing/reverse_paramedic_method.html
4	purdue_writing_lab_2021	The teacher demonstrated some of the various ways and methods for cutting words from my essay that I had written for class.	['The teacher demonstrated methods for cutting words from my essay.']	1	https://owl.purdue.edu/owl/general_writing/academic_writing/reverse_paramedic_method.html
5	purdue_writing_lab_2021	Eric Clapton and Steve Winwood formed a new band of musicians together in 1969, giving it the ironic name of Blind Faith because early speculation that was spreading everywhere about the band suggested that the new musical group would be good enough to rival the earlier bands that both men had been in, Cream and Traffic, which people had really liked and had been very popular.	["Eric Clapton and Steve Winwood formed a new band in 1969, ironically naming it Blind Faith because speculation suggested that the group would rival the musicians' previous popular bands, Cream and Traffic."]	4	https://owl.purdue.edu/owl/general_writing/academic_writing/reverse_paramedic_method.html
6	purdue_writing_lab_2021	Many have made the wise observation that when a stone is in motion rolling down a hill or incline that that moving stone is not as likely to be covered all over with the kind of thick green moss that grows on stationary unmoving things and becomes a nuisance and suggests that those things haven't moved in a long time and probably won't move any time soon.	['A rolling stone gathers no moss.']	4	https://owl.purdue.edu/owl/general_writing/academic_writing/reverse_paramedic_method.html
7	north_carolina_2021	For each and every book you purchase, you will receive a free bookmark.	['For every book you purchase, you will receive a free bookmark.']	1	https://writingcenter.unc.edu/tips-and-tools/conciseness-handout/
8	north_carolina_2021	Because a great many of the words in this sentence are basically unnecessary, it would really be a very good idea to edit somewhat for conciseness.	['Because many of the words in this sentence are unnecessary, we should edit it.']	6	https://writingcenter.unc.edu/tips-and-tools/conciseness-handout/
9	north_carolina_2021	The reason for the failure of the basketball team of the University of North Carolina in the Final Four game against the team from Kansas was that on that day and at that time, some players were frequently unable to rebound the ball.	["UNC's basketball team lost the Final Four game against Kansas because it could not consistently rebound the ball."]	3	https://writingcenter.unc.edu/tips-and-tools/conciseness-handout/
10	north_carolina_2021	Do not try to anticipate in advance those events that will completely revolutionize society.	['Do not try to anticipate revolutionary events.']	4	https://writingcenter.unc.edu/tips-and-tools/conciseness-handout/
11	north_carolina_2021	In the event that going out for the purpose of eating with them cannot be avoided, it is necessary that we first go to the ATM, in light of the fact that I am out of cash.	['If we must go out to eat with them, we should first go to the ATM because I am out of cash.']	4	https://writingcenter.unc.edu/tips-and-tools/conciseness-handout/
12	north_carolina_2021	If you do not have more than five years of experience, do not call for an interview if you have not already spoken to human resources.	['Applicants with more than five years of experience can bypass human resources and call for an interview.']	3	https://writingcenter.unc.edu/tips-and-tools/conciseness-handout/
13	north_carolina_2021	The 1780 constitution of Massachusetts was written by John Adams.	['John Adams wrote the 1780 Massachusetts Constitution.']	3	https://writingcenter.unc.edu/tips-and-tools/conciseness-handout/
14	north_carolina_2021	The letter was taken to the mailbox by Sally.	['Sally took the letter to the mailbox.']	3	https://writingcenter.unc.edu/tips-and-tools/conciseness-handout/
15	monash_2020	The manager is deficient in interpersonal skills and invests minimal time in assisting the clerks to develop their expertise.	['The manager lacks interpersonal skills and spends little time helping the clerks develop their skills.']	2	https://www.monash.edu/rlo/research-writing-assignments/writing/clear-communication/writing-clearly-concisely-and-precisely
16	monash_2020	Coral reefs can be damaged by rapid and substantial climatic changes.	['Rapid and substantial climatic changes can damage coral reefs.']	3	https://www.monash.edu/rlo/research-writing-assignments/writing/clear-communication/writing-clearly-concisely-and-precisely
17	monash_2020	The current upsurge in stakeholder dissatisfaction with the outcomes of local government decision-making is at least partially a consequence of the predilection against long-term planning.	['The current rise in stakeholder dissatisfaction with local government decisions is at least partly due to the lack of long-term planning.']	2	https://www.monash.edu/rlo/research-writing-assignments/writing/clear-communication/writing-clearly-concisely-and-precisely
18	monash_2020	The next step will be to undertake a thorough analysis of the results.	['The next step will be to thoroughly analyse the results.']	2	https://www.monash.edu/rlo/research-writing-assignments/writing/clear-communication/writing-clearly-concisely-and-precisely
19	monash_2020	Regular reviews of online content should be scheduled.	['Online content should be reviewed regularly. ', ' Companies should review online content regularly.']	3	https://www.monash.edu/rlo/research-writing-assignments/writing/clear-communication/writing-clearly-concisely-and-precisely
20	monash_2020	One important factor to consider is the age at which language instruction begins.	['One important consideration is the age at which language instruction begins.']	2	https://www.monash.edu/rlo/research-writing-assignments/writing/clear-communication/writing-clearly-concisely-and-precisely
21	monash_2020	The novel is preoccupied with matters such as post-colonial society and its mores, race, madness, and family relationships.	['The novel is preoccupied with post-colonial society and its mores, race, madness, and family relationships.']	1	https://www.monash.edu/rlo/research-writing-assignments/writing/clear-communication/writing-clearly-concisely-and-precisely
22	monash_2020	In the event that dividends continue to fall, it will be necessary to reduce staff numbers.	['If dividends continue to fall, it will be necessary to reduce staff numbers.']	2	https://www.monash.edu/rlo/research-writing-assignments/writing/clear-communication/writing-clearly-concisely-and-precisely
23	monash_2020	The opinion of the working group was that the budget for the project had been set too low.	["The working group's opinion was that the project budget had been set too low."]	2	https://www.monash.edu/rlo/research-writing-assignments/writing/clear-communication/writing-clearly-concisely-and-precisely
24	monash_2020	There are two goals for the project; to estimate the future energy needs of the South Pacific and to make recommendations as to the most viable renewable energy production options suitable for the region.	['The project goals are to estimate the future energy needs of the South Pacific and to recommend the most viable renewable energy production options for the region.']	3	https://www.monash.edu/rlo/research-writing-assignments/writing/clear-communication/writing-clearly-concisely-and-precisely
25	monash_2020	Measurement of scanner performance can be achieved through examination of four criteria; resolution, bit-depth, dynamic range and software.	['Scanner performance can be measured by examining four criteria: resolution, bit-depth, dynamic range and software.']	3	https://www.monash.edu/rlo/research-writing-assignments/writing/clear-communication/writing-clearly-concisely-and-precisely
26	gmu_2021	In high school, where I had the opportunity for three years of working with the student government, I realized how significantly a person's enthusiasm can be destroyed merely by the attitudes of his superiors.	["In high school, during three years on the student council, I saw students' enthusiasm destroyed by insecure teachers and cynical administrators."]	3	https://writingcenter.gmu.edu/guides/writing-concisely
27	gmu_2021	The poverty of Anne Moody was also a crucial factor in the formation of her character.	["Anne Moody's poverty also helped form her character."]	5	https://writingcenter.gmu.edu/guides/writing-concisely
28	gmu_2021	Frequently, a chapter in a book reveals to the reader the main point that the author desires to bring out during the course of the chapter.	["A chapter's title often reveals its thesis."]	5	https://writingcenter.gmu.edu/guides/writing-concisely
29	gmu_2021	In both Orwell's and Baldwin's essays, the feeling of white supremacy is very important.	['Both Orwell and Baldwin trace the consequences of white supremacy.']	3	https://writingcenter.gmu.edu/guides/writing-concisely
30	gmu_2021	The scene is taking place at night, in front of the capitol building.	['The scene takes place at night, in front of the capitol building.']	2	https://writingcenter.gmu.edu/guides/writing-concisely
31	gmu_2021	The friar is knowledgeable about Juliet being alive.	['The friar knows that Juliet is alive.']	2	https://writingcenter.gmu.edu/guides/writing-concisely
32	gmu_2021	There are two pine trees which are growing behind this house.	['Two pine trees grow behind this house.']	3	https://writingcenter.gmu.edu/guides/writing-concisely
33	gmu_2021	Any student could randomly sit anywhere.	['Students could sit anywhere.']	1	https://writingcenter.gmu.edu/guides/writing-concisely
34	gmu_2021	Housing for married students is not unworthy of consideration.	['Housing for married students is worthy of consideration.']	2	https://writingcenter.gmu.edu/guides/writing-concisely
35	gmu_2021	This is a quote from Black Elk's autobiography that discloses his prophetic powers.	["This quote from Black Elk's autobiography discloses his prophetic powers."]	1	https://writingcenter.gmu.edu/guides/writing-concisely
36	gmu_2021	It is frequently considered that Hamlet is Shakespeare's most puzzling play.	["Hamlet is frequently considered Shakespeare's most puzzling play."]	1	https://writingcenter.gmu.edu/guides/writing-concisely
37	waldenu_2021	It has been argued by Stargill that there is no topic in education on which there is greater agreement and consensus among educators than on the need for parental involvement in classrooms (Stargill, 2009).	['Educators agree on the need for parental involvement in classrooms (Stargill, 2009).']	5	https://academicguides.waldenu.edu/writingcenter/scholarlyvoice/writingconcisely
38	waldenu_2021	Scholars, researchers, and writers have recommended and promoted student assessment as a means by which to address the achievement gap.	['Researchers have recommended student assessment to address the achievement gap.']	1	https://academicguides.waldenu.edu/writingcenter/scholarlyvoice/writingconcisely
39	waldenu_2021	There are 30 participants who volunteered for the study.	['Thirty participants volunteered for the study.']	4	https://academicguides.waldenu.edu/writingcenter/scholarlyvoice/writingconcisely
40	waldenu_2021	I feel that the study is very significant to scholars in psychology.	['The study is significant to psychology scholars.']	1	https://academicguides.waldenu.edu/writingcenter/scholarlyvoice/writingconcisely
41	uagc_2021	We will be home in a period of ten days.	['We will be home in ten days.']	1	https://writingcenter.uagc.edu/writing-clearly-concisely
42	uagc_2021	It has come to my attention that there is a vast proliferation of undesirable vegetation surrounding the periphery of this facility.	['I have noticed many weeds growing around the building.']	5	https://writingcenter.uagc.edu/writing-clearly-concisely
43	uagc_2021	A decision to vote on the issue was made by the committee this week.	['This week, the committee decided to vote on the issue.']	3	https://writingcenter.uagc.edu/writing-clearly-concisely
44	uagc_2021	Jon will let me know in the event that he can get away and make the trip.	['Jon will call me if he can go.']	2	https://writingcenter.uagc.edu/writing-clearly-concisely
45	uagc_2021	There are four officers who report to the captain.	['Four officers report to the captain.']	1	https://writingcenter.uagc.edu/writing-clearly-concisely
46	uagc_2021	Luis was interested in the data processing field.	['Luis was interested in data processing.']	1	https://writingcenter.uagc.edu/writing-clearly-concisely
47	uagc_2021	I said that I was tired.	['I said I was tired.']	1	https://writingcenter.uagc.edu/writing-clearly-concisely
48	uagc_2021	I stepped off of the curb.	['I stepped off the curb.']	1	https://writingcenter.uagc.edu/writing-clearly-concisely
49	uagc_2021	I got up on the ladder.	['I got on the ladder.']	1	https://writingcenter.uagc.edu/writing-clearly-concisely
50	uis_2021	Many people prefer Marvel Comics (to DC Comics), due to the fact that they explore more characters in their canon.	['Many people prefer Marvel Comics (to DC Comics) because they explore more characters in their canon.']	2	https://www.uis.edu/cas/thelearninghub/writing/handouts/grammar-mechanics-and-style/writing-clear-concise-sentences/
51	uis_2021	Marvel fans watch Agents of S.H.I.E.L.D. in order to expand their knowledge of the Marvel canon.	['Marvel fans watch Agents of S.H.I.E.L.D. to expand their knowledge of the Marvel canon.']	1	https://www.uis.edu/cas/thelearninghub/writing/handouts/grammar-mechanics-and-style/writing-clear-concise-sentences/
52	uis_2021	There are many examples why Marvel is the stronger comic.	['Many examples support why Marvel is the stronger comic.']	3	https://www.uis.edu/cas/thelearninghub/writing/handouts/grammar-mechanics-and-style/writing-clear-concise-sentences/
53	uis_2021	It is clear that DC has superior superheroes in its canon.	['DC has superior superheroes in its canon.']	1	https://www.uis.edu/cas/thelearninghub/writing/handouts/grammar-mechanics-and-style/writing-clear-concise-sentences/
54	uis_2021	I believe that Channing Tatum may not make the best Gambit in the upcoming movie.	['Channing Tatum may not make the best Gambit in the upcoming movie.']	1	https://www.uis.edu/cas/thelearninghub/writing/handouts/grammar-mechanics-and-style/writing-clear-concise-sentences/
55	uis_2021	My favorite superheroes are both Batman and Iron Man.	['My favorite superheroes are Batman and Iron Man.']	1	https://www.uis.edu/cas/thelearninghub/writing/handouts/grammar-mechanics-and-style/writing-clear-concise-sentences/
56	uis_2021	Man of Steel and Batman vs. Superman disappointed at the box office, and the reason why is because people are tired of origin stories.	['Man of Steel and Batman vs. Superman disappointed at the box office because people are tired of origin stories.']	1	https://www.uis.edu/cas/thelearninghub/writing/handouts/grammar-mechanics-and-style/writing-clear-concise-sentences/
57	uis_2021	She was in an elated state of mind.	['She was elated.']	1	https://www.uis.edu/cas/thelearninghub/writing/handouts/grammar-mechanics-and-style/writing-clear-concise-sentences/
58	uis_2021	They are connected together.	['They are connected.']	1	https://www.uis.edu/cas/thelearninghub/writing/handouts/grammar-mechanics-and-style/writing-clear-concise-sentences/
59	uis_2021	They have many traits in common to both.	['They share many traits.']	2	https://www.uis.edu/cas/thelearninghub/writing/handouts/grammar-mechanics-and-style/writing-clear-concise-sentences/
60	uis_2021	The houses are in close proximity.	['The houses are nearby.']	2	https://www.uis.edu/cas/thelearninghub/writing/handouts/grammar-mechanics-and-style/writing-clear-concise-sentences/
61	uis_2021	He has no emotional feelings.	['He has no feelings.']	1	https://www.uis.edu/cas/thelearninghub/writing/handouts/grammar-mechanics-and-style/writing-clear-concise-sentences/
62	uis_2021	Each and every person should come.	['Everyone should come.']	2	https://www.uis.edu/cas/thelearninghub/writing/handouts/grammar-mechanics-and-style/writing-clear-concise-sentences/
63	stanford_2021	The Acme Corporation is developing a new consumer device that allows users to communicate vocally in real time.	['The Acme Corporation is developing a new cell phone.']	2	https://stanford.edu/class/ee267/WIM/writing_style_guide.pdf
64	stanford_2021	Basically, the first widget pretty much surpassed the second one in overall performance.	['The first widget performed better than the second.']	2	https://stanford.edu/class/ee267/WIM/writing_style_guide.pdf
65	stanford_2021	The engineer considered the second monitor an unneeded luxury.	['The engineer considered the second monitor a luxury.']	2	https://stanford.edu/class/ee267/WIM/writing_style_guide.pdf
66	stanford_2021	The test revealed conduction activity that was peculiar in nature.	['The test revealed peculiar conduction activity.']	1	https://stanford.edu/class/ee267/WIM/writing_style_guide.pdf
67	stanford_2021	We redid the experiment due to the fact that our initial method was incorrect.	['We redid the experiment because our initial method was incorrect.']	2	https://stanford.edu/class/ee267/WIM/writing_style_guide.pdf
68	stanford_2021	Your audience will not appreciate the details that lack relevance.	['Your audience will appreciate relevant details.']	2	https://stanford.edu/class/ee267/WIM/writing_style_guide.pdf
69	stanford_2021	The Acme Corporation continues to work on the cell phone case configuration revision project.	['The Acme Corporation is developing a redesigned cell phone case.']	2	https://stanford.edu/class/ee267/WIM/writing_style_guide.pdf
70	stanford_2021	The design was completed by us.	['We completed the design.']	3	https://stanford.edu/class/ee267/WIM/writing_style_guide.pdf
71	stanford_2021	Our lack of data prevented evaluation of the areas in most need of assistance.	['Because we lacked data, we could not evaluate the areas that most needed assistance.']	3	https://stanford.edu/class/ee267/WIM/writing_style_guide.pdf
72	stanford_2021	The discovery of a method for the manufacture of artificial skin will have the result of an increase in the survival of patients with radical burns.	['If researchers discover how to manufacture artificial skin, more patients will survive radical burns.']	3	https://stanford.edu/class/ee267/WIM/writing_style_guide.pdf
73	stanford_2021	The outcome is dependent on the data.	['The outcome depends on the data.']	2	https://stanford.edu/class/ee267/WIM/writing_style_guide.pdf
74	stanford_2021	There is the possibility of approval of the study ahead of time.	['Robin may approve of the study ahead of time.']	3	https://stanford.edu/class/ee267/WIM/writing_style_guide.pdf
75	stanford_2021	The lack of any knowledge on the part of the investigators about local conditions precluded determination of committee action effectiveness in fund allocation to those areas in greatest need of assistance.	['Because the investigators did not know anything about local conditions, they could not determine how effectively the committee had allocated funds to the areas that most needed assistance.']	3	https://stanford.edu/class/ee267/WIM/writing_style_guide.pdf
76	uri_2019	It was instructed by the professor that the assignments must be submitted by the due date.	['The professor instructed that the assignment be submitted by the due date.']	3	https://web.uri.edu/graduate-writing-center/concise-writing-tips-and-tricks/
77	uri_2019	It was earlier demonstrated that climate change can be caused by air pollution.	['Early studies demonstrated that air pollution can cause climate change.']	3	https://web.uri.edu/graduate-writing-center/concise-writing-tips-and-tricks/
78	uri_2019	An evaluation of the methods needs to be done.	['The methods need to be evaluated. ', ' We need to evaluate the methods.']	3	https://web.uri.edu/graduate-writing-center/concise-writing-tips-and-tricks/
79	uri_2019	It was the final result that finally persuaded me.	['The final result finally persuaded me.']	1	https://web.uri.edu/graduate-writing-center/concise-writing-tips-and-tricks/
80	uri_2019	There are likely to be many researchers that raise questions about this methodological approach.	['Many researchers are likely to question this methodology.']	5	https://web.uri.edu/graduate-writing-center/concise-writing-tips-and-tricks/
81	uri_2019	Research is increasing in the field of nutrition and food science.	['Research is increasing in nutrition and food science. ', ' Research within nutrition and food science is increasing.']	6	https://web.uri.edu/graduate-writing-center/concise-writing-tips-and-tricks/
82	uri_2019	The focus of this project was to study the effects of sea level rise on coastal habitats.	['This project examined how sea level rise affects coastal habitats.']	3	https://web.uri.edu/graduate-writing-center/concise-writing-tips-and-tricks/
83	uri_2019	The students were researching climate change impacts.	['The students researched climate change impacts.']	2	https://web.uri.edu/graduate-writing-center/concise-writing-tips-and-tricks/
84	boras_2021	These results are in agreement with prior findings.	['These results agree with prior findings.']	2	https://www.hb.se/en/staff/my-employment/competence-development/academic-communication/writing-concisely/
85	boras_2021	We performed an analysis of several factors.	['We analysed several factors.']	2	https://www.hb.se/en/staff/my-employment/competence-development/academic-communication/writing-concisely/
86	boras_2021	Our results are in opposition to Johnson's study.	["Our results contradict Johnson's study."]	2	https://www.hb.se/en/staff/my-employment/competence-development/academic-communication/writing-concisely/
87	boras_2021	Our method is an improvement over prior systems.	['Our method improves on prior systems.']	2	https://www.hb.se/en/staff/my-employment/competence-development/academic-communication/writing-concisely/
88	boras_2021	AjeA was found to be present in the nucleus.	['AjeA localised to the nucleus.']	2	https://www.hb.se/en/staff/my-employment/competence-development/academic-communication/writing-concisely/
89	boras_2021	Table 1 presents a summary of the patient data.	['Table 1 summarises the patient data.']	2	https://www.hb.se/en/staff/my-employment/competence-development/academic-communication/writing-concisely/
90	boras_2021	An analysis of learning outcomes was made on the basis of the findings.	['Learning outcomes were analysed on the basis of the findings.']	5	https://www.hb.se/en/staff/my-employment/competence-development/academic-communication/writing-concisely/
91	boras_2021	There was considerable waste after production.	['The production created considerable waste.']	3	https://www.hb.se/en/staff/my-employment/competence-development/academic-communication/writing-concisely/
92	boras_2021	They made the decision to adjust.	['They decided to adjust.']	2	https://www.hb.se/en/staff/my-employment/competence-development/academic-communication/writing-concisely/
93	boras_2021	The reduction in the census was caused by the lack of a favourable response by officials.	['The lack of a favourable official response reduced the census.']	5	https://www.hb.se/en/staff/my-employment/competence-development/academic-communication/writing-concisely/
94	naval_2021	The cornerstone to the government providing essential emergency services to its citizens is ensuring there has been effective planning to anticipate a variety of challenges to deliver these critical services.	['To provide essential emergency services to its citizens, the government must plan effectively.']	5	https://nps.edu/web/gwc/concision
95	naval_2021	The most authoritative account of the Great Umbrella Tariffs of 1810-13 was written by Philippa von Phrasewitz in the years immediately following those storied events.	['Philippa von Phrasewitz wrote the most authoritative account of the Great Umbrella Tariffs of 1810-13 in the years immediately following those storied events.']	3	https://nps.edu/web/gwc/concision
96	leeds_2017	The survey was designed by the research assistant.	['The research assistant designed the survey.']	1	https://library.leeds.ac.uk/info/14011/writing/106/academic_writing/5
97	tamu_2021	First and foremost, the pieces must be aligned in an accurate manner.	['First, the pieces must be aligned accurately.']	2	https://writingcenter.tamu.edu/Students/Writing-Speaking-Guides/Alphabetical-List-of-Guides/Drafting/Clear-Concise-Writing
98	tamu_2021	Whatever results are found during the trials, and they may or may not be favorable, we will stand behind the science.	['Whatever results are found during the trials, we will stand behind the science.']	1	https://writingcenter.tamu.edu/Students/Writing-Speaking-Guides/Alphabetical-List-of-Guides/Drafting/Clear-Concise-Writing
99	tamu_2021	We must make, if we want to be respected, sound choices.	['If we want to be respected, we must make sound choices. ', ' We must make sound choices if we want to be respected.']	3	https://writingcenter.tamu.edu/Students/Writing-Speaking-Guides/Alphabetical-List-of-Guides/Drafting/Clear-Concise-Writing
100	tamu_2021	There are several syntactic devices that let you manage where you locate units of new information in a sentence.	['Several syntactic devices let you manage where you locate units of new information in a sentence.']	1	https://writingcenter.tamu.edu/Students/Writing-Speaking-Guides/Alphabetical-List-of-Guides/Drafting/Clear-Concise-Writing
101	tamu_2021	The use of this method would eliminate the problem.	['This method would eliminate the problem.']	1	https://writingcenter.tamu.edu/Students/Writing-Speaking-Guides/Alphabetical-List-of-Guides/Drafting/Clear-Concise-Writing
102	tamu_2021	Scientists have learned that their observations are as subjective as those in any other field in recent years.	['In recent years, scientists have learned that that their observations are as subjective as those in any other field.']	3	https://writingcenter.tamu.edu/Students/Writing-Speaking-Guides/Alphabetical-List-of-Guides/Drafting/Clear-Concise-Writing
103	massey_2021	The group of science students sat their exams.	['The science students sat their exams.']	1	https://owll.massey.ac.nz/academic-writing/writing-concisely.php
104	massey_2021	Smith (2006) also believed this to be true, but took into consideration the fact that some managers also preferred to have long meetings that took all day.	['Smith(2006) agreed, but considered the fact that some managers preferred to have longer, all-day meetings.']	5	https://owll.massey.ac.nz/academic-writing/writing-concisely.php
105	massey_2021	The farmer sheared the sheep and removed all their wool.	['The farmer sheared the sheep.']	1	https://owll.massey.ac.nz/academic-writing/writing-concisely.php
106	massey_2021	There are several of the soldiers, each with their guns and ammunition, who gathered at the gates of the camp before dawn.	['Several of the soldiers, each with their own guns and ammunition, gathered at the camp gates before dawn.']	3	https://owll.massey.ac.nz/academic-writing/writing-concisely.php
107	ualr_2021	As far as my professor is concerned, the problem of wordiness is the thing she'd really like to see us involved with actually eliminating.	['My professor wants us to focus on eliminating wordiness.']	3	https://ualr.edu/writingcenter/somes-steps-toward-concise-writing/
108	ualr_2021	There are many women who never marry.	['Many women never marry.']	1	https://ualr.edu/writingcenter/somes-steps-toward-concise-writing/
109	ualr_2021	It is his last book that shows his genius best.	['His last book shows his genius best.']	1	https://ualr.edu/writingcenter/somes-steps-toward-concise-writing/
110	commnet_2021	Many uneducated citizens who have never attended school continue to vote for better schools.	['Many uneducated citizens who have never attended school continue to vote for better schools.']	1	http://grammar.ccc.commnet.edu/grammar/quizzes/nova/nova11.htm
111	commnet_2021	All things considered, Connecticut's woodlands are in better shape now than ever before.	["Connecticut's woodlands are in better shape now than ever before."]	6	http://grammar.ccc.commnet.edu/grammar/quizzes/nova/nova11.htm
112	commnet_2021	As a matter of fact, there are more woodlands in Connecticut now than there were in 1898.	['There are more woodlands in Connecticut now than there were in 1898.']	1	http://grammar.ccc.commnet.edu/grammar/quizzes/nova/nova11.htm
113	commnet_2021	As far as I'm concerned, there is no need for further protection of woodlands.	['Further protection of woodlands is not needed.']	6	http://grammar.ccc.commnet.edu/grammar/quizzes/nova/nova11.htm
114	commnet_2021	This is because there are fewer farmers at the present time.	['This is because there are fewer farmers now.']	2	http://grammar.ccc.commnet.edu/grammar/quizzes/nova/nova11.htm
115	commnet_2021	Woodlands have grown in area because of the fact that farmers have abandoned their fields.	['Woodlands have grown in area because farmers have abandoned their fields.']	1	http://grammar.ccc.commnet.edu/grammar/quizzes/nova/nova11.htm
116	commnet_2021	Major forest areas are coming back by means of natural processes.	['Major forest areas are coming back naturally.']	2	http://grammar.ccc.commnet.edu/grammar/quizzes/nova/nova11.htm
117	commnet_2021	Our woodlands are coming back by virtue of the fact that our economy has shifted its emphasis.	['Our woodlands are coming back because our economy has shifted its emphasis.']	2	http://grammar.ccc.commnet.edu/grammar/quizzes/nova/nova11.htm
118	commnet_2021	Due to the fact that their habitats are being restored, forest creatures are also re-establishing their population bases.	['Because their habitats are being restored, forest creatures are also re-establishing their population bases.']	2	http://grammar.ccc.commnet.edu/grammar/quizzes/nova/nova11.htm
119	commnet_2021	The fear that exists among many people that we are losing our woodlands is uncalled for.	['The fear among many people that we are losing our woodlands is uncalled for.']	1	http://grammar.ccc.commnet.edu/grammar/quizzes/nova/nova11.htm
120	commnet_2021	The era in which we must aggressively defend our woodlands has, for all intents and purposes, passed.	['The era in which we must aggressively defend our woodlands has passed.']	1	http://grammar.ccc.commnet.edu/grammar/quizzes/nova/nova11.htm
121	commnet_2021	For the most part, people's suspicions are based on a misunderstanding of the facts.	["People's suspicions are based on a misunderstanding of the facts."]	1	http://grammar.ccc.commnet.edu/grammar/quizzes/nova/nova11.htm
122	commnet_2021	Many woodlands, in fact, have been purchased for the purpose of creating public parks.	['Many woodlands, in fact, have been purchased as public parks.']	4	http://grammar.ccc.commnet.edu/grammar/quizzes/nova/nova11.htm
123	commnet_2021	This policy has a tendency to isolate some communities.	['This policy tends to isolate some communities.']	2	http://grammar.ccc.commnet.edu/grammar/quizzes/nova/nova11.htm
124	commnet_2021	The policy has, in a manner of speaking, begun to Balkanize the more rural parts of our state.	['The policy has begun to Balkanize the more rural parts of our state.']	1	http://grammar.ccc.commnet.edu/grammar/quizzes/nova/nova11.htm
125	commnet_2021	In a very real sense, this policy works to the detriment of those it is supposed to help.	['This policy works to the detriment of those it is supposed to help.']	1	http://grammar.ccc.commnet.edu/grammar/quizzes/nova/nova11.htm
126	commnet_2021	In my opinion, this wasteful policy ought to be revoked.	['This wasteful policy ought to be revoked.']	1	http://grammar.ccc.commnet.edu/grammar/quizzes/nova/nova11.htm
127	commnet_2021	In the case of this particular policy, citizens of northeast Connecticut became very upset.	['Citizens of northeast Connecticut became very upset about his policy.']	3	http://grammar.ccc.commnet.edu/grammar/quizzes/nova/nova11.htm
128	commnet_2021	In the final analysis, the state would have been better off without such a policy.	['The state would have been better off without such a policy.']	1	http://grammar.ccc.commnet.edu/grammar/quizzes/nova/nova11.htm
129	commnet_2021	In the event that enough people protest, it will probably be revoked.	['If enough people protest, it will probably be revoked.']	2	http://grammar.ccc.commnet.edu/grammar/quizzes/nova/nova11.htm
130	commnet_2021	Something in the nature of a repeal may soon take place.	['Something like a repeal may soon take place.']	2	http://grammar.ccc.commnet.edu/grammar/quizzes/nova/nova11.htm
131	commnet_2021	Legislators are already in the process of reviewing the statutes.	['Legislators are already reviewing the statutes.']	1	http://grammar.ccc.commnet.edu/grammar/quizzes/nova/nova11.htm
132	commnet_2021	It seems that they can't wait to get rid of this one.	["They can't wait to get rid of this one."]	1	http://grammar.ccc.commnet.edu/grammar/quizzes/nova/nova11.htm
133	commnet_2021	They have monitored the activities of conservationists in a cautious manner.	['They have cautiously monitored the activities of conservationists.']	5	http://grammar.ccc.commnet.edu/grammar/quizzes/nova/nova11.htm
134	commnet_2021	The point I am trying to make is that sometimes public policy doesn't accomplish what it set out to achieve.	["Sometimes public policy doesn't accomplish what it set out to achieve."]	1	http://grammar.ccc.commnet.edu/grammar/quizzes/nova/nova11.htm
135	commnet_2021	Legislators need to be more careful of the type of policy they propose.	['Legislators need to be more careful of the policy they propose.']	1	http://grammar.ccc.commnet.edu/grammar/quizzes/nova/nova11.htm
136	commnet_2021	What I mean to say is that well intentioned lawmakers sometimes make fools of themselves.	['Well intentioned lawmakers sometimes make fools of themselves.']	1	http://grammar.ccc.commnet.edu/grammar/quizzes/nova/nova11.htm
137	commnet_2021	Smith College, which was founded in 1871, is the premier all-women's college in the United States.	["Founded in 1871, Smith College is the premier all-women's college in the United States."]	1	http://grammar.ccc.commnet.edu/grammar/quizzes/nova/nova11.htm
138	commnet_2021	Citizens who knew what was going on voted him out of office.	['Knowledgeable citizens voted him out of office.']	5	http://grammar.ccc.commnet.edu/grammar/quizzes/nova/nova11.htm
139	commnet_2021	Recommending that a student copy from another student's paper is not something he would recommend.	["He would never tell a student to copy from another student's paper."]	3	http://grammar.ccc.commnet.edu/grammar/quizzes/nova/nova11.htm
140	commnet_2021	Unencumbered by a sense of responsibility, Jasion left his wife with forty-nine kids and a can of beans.	['Jasion irresponsibly left his wife with forty-nine kids and a can of beans.']	3	http://grammar.ccc.commnet.edu/grammar/quizzes/nova/nova11.htm
141	commnet_2021	At this point in time we can't ascertain the reason as to why the screen door was left open.	["We don't know why the screen door was left open."]	4	http://grammar.ccc.commnet.edu/grammar/quizzes/nova/nova11.htm
142	commnet_2021	My sister, who is employed as a nutritionist at the University of Michigan, recommends the daily intake of megadoses of Vitamin C.	['My sister, a nutritionist at the University of Michigan, recommends daily megadoses of Vitamin C.']	1	http://grammar.ccc.commnet.edu/grammar/quizzes/nova/nova11.htm
143	commnet_2021	Basically, in light of the fact that Congressman Fuenches was totally exhausted by his last campaign, there was an expectation on the part of the voters that he would not reduplicate his effort to achieve office in government again.	['Because Congressman Fuenches was exhausted by his last campaign, voters expected he would not seek re-election. ', " Voters thought that Congressman Fuenches was so exhausted by his last campaign that he wouldn't seek re-election."]	7	http://grammar.ccc.commnet.edu/grammar/quizzes/nova/nova11.htm
144	commnet_2021	It is to be hoped that we discover a means to create an absolutely proper and fitting tribute to Professor Espinoza.	['We hope for an appropriate tribute to Professor Espinoza.']	3	http://grammar.ccc.commnet.edu/grammar/quizzes/nova/nova11.htm
145	commnet_2021	There is a desire on the part of many of us to maintain a spring recess for the purpose of getting away from the demands of our studies.	['We want a spring recess so we can get away from our studies. ', ' We want a spring recess to escape our studies.']	6	http://grammar.ccc.commnet.edu/grammar/quizzes/nova/nova11.htm
146	commnet_2021	What is your basic understanding of predestination?	['Explain predestination.']	3	http://grammar.ccc.commnet.edu/grammar/quizzes/nova/nova11.htm
147	commnet_2021	At what point in time will a downturn in the stock market have a really serious effect on the social life of people as a whole?	['When will a downturn in the stock market affect society?']	4	http://grammar.ccc.commnet.edu/grammar/quizzes/nova/nova11.htm
148	commnet_2021	I would call your attention to the fact that our President, who was formerly the Governor of Arkansas, is basically a Southerner.	['Our President, formerly the Governor of Arkansas, is a Southerner.']	1	http://grammar.ccc.commnet.edu/grammar/quizzes/nova/nova11.htm
149	commnet_2021	There are millions of fans who desperately want the Hartford Whalers to stay in the city.	['Millions of fans desperately want the Hartford Whalers to stay in the city.']	1	http://grammar.ccc.commnet.edu/grammar/quizzes/nova/nova11.htm
150	commnet_2021	Bothered by allergies, a condition that made them sneeze, some of the preschool children had sinus troubles that caused them to miss several days in nursery school this spring.	['Bothered by allergies, some children missed several days in nursery school this spring.']	4	http://grammar.ccc.commnet.edu/grammar/quizzes/nova/nova11.htm
151	commnet_2021	The nursery school teacher education training sessions involve active interfacing with preschool children of the appropriate age as well as intensive peer interaction in the form of role playing.	['Training for nursery school teachers involves interacting with preschoolers and role playing with peers.']	3	http://grammar.ccc.commnet.edu/grammar/quizzes/nova/nova11.htm
152	commnet_2021	He found his neighbor who lived next door to be attractive in appearance.	['He found his neighbor attractive.']	1	http://grammar.ccc.commnet.edu/grammar/quizzes/nova/nova11.htm
153	commnet_2021	He was really late to his English class due to the fact that he had to finish his math test.	['He was late for English because he had to finish his math test.']	4	http://grammar.ccc.commnet.edu/grammar/quizzes/nova/nova11.htm
154	commnet_2021	Although they were several in number, the street gang feared the police.	['Although they were a large group, the street gang feared the police.']	2	http://grammar.ccc.commnet.edu/grammar/quizzes/nova/nova11.htm
155	commnet_2021	Bob provided an explanation of the computer to his grandmother.	['Bob explained the computer to his grandmother.']	2	http://grammar.ccc.commnet.edu/grammar/quizzes/nova/nova11.htm
156	commnet_2021	During the time when I lived in South Carolina, it was my intention to go to college in Florida.	['When I lived in South Carolina, I planned to attend college in Florida.']	2	http://grammar.ccc.commnet.edu/grammar/quizzes/nova/nova11.htm
157	commnet_2021	In order to prove that he could hold his own on the track team, Gordo had to train hard like the old runners.	['To prove that he could hold his own on the track team, Gordo had to train hard like the older runners.']	4	http://grammar.ccc.commnet.edu/grammar/quizzes/nova/nova11.htm
158	commnet_2021	If you go to the store, you will see that the store is closed on Sundays because the storeowner likes to go to church.	['If you go to the store, you will see that it is closed on Sunday because the owner likes to go to church. ', ' The store is closed on Sundays because the owner attends church.']	5	http://grammar.ccc.commnet.edu/grammar/quizzes/nova/nova11.htm
159	commnet_2021	Due to the fact that Jim liked chocolate, he was very upset when the candy company canceled production of his favorite chocolate bar.	['Because Jim liked chocolate, he was very upset when the candy company canceled his favorite chocolate bar. ', ' Jim was upset when the candy company canceled production of his favorite chocolate bar.']	5	http://grammar.ccc.commnet.edu/grammar/quizzes/nova/nova11.htm
160	commnet_2021	One time when I went to the park, my friend, whose name is Jake, went with me and we had fun due to the fact that it was a nice day out.	['When I went to the park with my friend Jake, we had fun because it was such a nice day.']	4	http://grammar.ccc.commnet.edu/grammar/quizzes/nova/nova11.htm
161	commnet_2021	In this report I will conduct a study of ants and the setup of their colonies.	['I will study ants and their colonies in this report. ', ' This report studies ants.']	5	http://grammar.ccc.commnet.edu/grammar/quizzes/nova/nova11.htm
162	commnet_2021	An investigation of the symbolic overtones in Melville's "Billy Budd, Sailor" reveals the opposing personas of Billy Budd's naivete and Claggart's vituperative demeanor.	['The powerful symbols in Melville\'s "Billy Budd, Sailor" develop Budd\'s innocence in contrast to the corrupt Claggart.']	3	http://grammar.ccc.commnet.edu/grammar/quizzes/nova/nova11.htm
163	commnet_2021	In hopes of rejuvenating their romantic liaison, the couple went on a pilgrimage to become one with nature.	['In hopes of rekindling their romance, the couple went camping.']	2	http://grammar.ccc.commnet.edu/grammar/quizzes/nova/nova11.htm
164	commnet_2021	A mathematical mindset best suits the making of decisions that profoundly affect this company's future business relations.	['Executive decisions require precise calculations.']	5	http://grammar.ccc.commnet.edu/grammar/quizzes/nova/nova11.htm
165	commnet_2021	Joe found that the fictional novel by Alcott, Little Women, conveyed a sense of emotion and feeling.	["Joe found Alcott's book, Little Women, both delightful and tragic."]	7	http://grammar.ccc.commnet.edu/grammar/quizzes/nova/nova11.htm
166	commnet_2021	The existence of computers and computer technology has greatly influenced commercial enterprise and information exchange.	['Computers have improved business communication.']	4	http://grammar.ccc.commnet.edu/grammar/quizzes/nova/nova11.htm
167	commnet_2021	Attentive focusing on the professor's informational lecture was not always completely possible.	["Focusing on professor's boring lectures was a problem for most students."]	6	http://grammar.ccc.commnet.edu/grammar/quizzes/nova/nova11.htm
168	commnet_2021	After extensive nightly labors on an academic assignment, Sally needed a lengthy period of somnolence.	['After staying up all night finishing a paper, Sally needed a long nap.']	5	http://grammar.ccc.commnet.edu/grammar/quizzes/nova/nova11.htm
169	strunk_1918	My first visit to Boston will always be remembered by me.	['I shall always remember my first visit to Boston.']	3	https://www.bartleby.com/141/strunk5.html#13
170	strunk_1918	There were a great number of dead leaves lying on the ground.	['Dead leaves covered the ground.']	3	https://www.bartleby.com/141/strunk5.html#13
171	strunk_1918	The sound of the falls could still be heard.	['The sound of the falls still reached our ears.']	3	https://www.bartleby.com/141/strunk5.html#13
172	strunk_1918	The reason that he left college was that his health became impaired.	['Failing health compelled him to leave college.']	3	https://www.bartleby.com/141/strunk5.html#13
173	strunk_1918	It was not long before he was very sorry that he had said what he had.	['He soon repented his words.']	3	https://www.bartleby.com/141/strunk5.html#13
174	strunk_1918	Gold was not allowed to be exported.	['It was forbidden to export gold.']	3	https://www.bartleby.com/141/strunk5.html#13
175	strunk_1918	He has been proved to have been seen entering the building.	['It has been proved that he was seen to enter the building.']	3	https://www.bartleby.com/141/strunk5.html#13
176	strunk_1918	A survey of this region was made in 1900.	['This region was surveyed in 1900.']	3	https://www.bartleby.com/141/strunk5.html#13
177	strunk_1918	Mobilization of the army was rapidly carried out.	['The army was rapidly mobilized.']	3	https://www.bartleby.com/141/strunk5.html#13
178	strunk_1918	Confirmation of these reports cannot be obtained.	['These reports cannot be confirmed.']	3	https://www.bartleby.com/141/strunk5.html#13
179	strunk_1918	He was not very often on time.	['He usually came late.']	3	https://www.bartleby.com/141/strunk5.html#13
180	strunk_1918	He did not think that studying Latin was much use.	['He thought the study of Latin useless.']	3	https://www.bartleby.com/141/strunk5.html#13
181	strunk_1918	Formerly, science was taught by the textbook method, while now the laboratory method is employed.	['Formerly, science was taught by the textbook method; now it is taught by the laboratory method.']	3	https://www.bartleby.com/141/strunk5.html#13
182	strunk_1918	It was both a long ceremony and very tedious.	['The ceremony was both long and tedious.']	3	https://www.bartleby.com/141/strunk5.html#13
183	strunk_1918	Wordsworth, in the fifth book of The Excursion, gives a minute description of this church.	['In the fifth book of The Excursion, Wordsworth gives a minute description of this church.']	1	https://www.bartleby.com/141/strunk5.html#13
184	strunk_1918	Cast iron, when treated in a Bessemer converter, is changed into steel.	['By treatment in a Bessemer converter, cast iron is changed into steel.']	3	https://www.bartleby.com/141/strunk5.html#13
185	strunk_1918	There was a look in his eye that boded mischief.	['In his eye was a look that boded mischief.']	1	https://www.bartleby.com/141/strunk5.html#13
186	strunk_1918	He wrote three articles about his adventures in Spain, which were published in Harper's Magazine.	["He published in Harper's Magazine three articles about his adventures in Spain."]	1	https://www.bartleby.com/141/strunk5.html#13
187	purdue_writing_lab_2021	I received your inquiry that you wrote about tennis rackets yesterday, and read it thoroughly.	['I received your inquiry about tennis rackets yesterday.']	1	https://owl.purdue.edu/owl/general_writing/academic_writing/reverse_paramedic_method.html
188	purdue_writing_lab_2021	It goes without saying that we are acquainted with your policy on filing tax returns, and we have every intention of complying with the regulations that you have mentioned.	['We intend to comply with the tax-return regulations that you have mentioned.']	3	https://owl.purdue.edu/owl/general_writing/academic_writing/reverse_paramedic_method.html
189	purdue_writing_lab_2021	Imagine a mental picture of someone engaged in the intellectual activity of trying to learn what the rules are for how to play the game of chess.	['Imagine someone trying to learn the rules of chess.']	1	https://owl.purdue.edu/owl/general_writing/academic_writing/reverse_paramedic_method.html
190	purdue_writing_lab_2021	Baseball, one of our oldest and most popular outdoor summer sports in terms of total attendance at ball parks and viewing on television, has the kind of rhythm of play on the field that alternates between times when players passively wait with no action taking place between the pitches to the batter and then times when they explode into action as the batter hits a pitched ball to one of the playe…	['Baseball has a rhythm that alternates between waiting and explosive action.']	3	https://owl.purdue.edu/owl/general_writing/academic_writing/reverse_paramedic_method.html
191	purdue_writing_lab_2021	Any particular type of dessert is fine with me.	['Any dessert is fine with me.']	1	https://owl.purdue.edu/owl/general_writing/academic_writing/reverse_paramedic_method.html
192	purdue_writing_lab_2021	Balancing the budget by Friday is an impossibility without some kind of extra help.	['Balancing the budget by Friday is impossible without extra help.']	4	https://owl.purdue.edu/owl/general_writing/academic_writing/reverse_paramedic_method.html
193	purdue_writing_lab_2021	For all intents and purposes, American industrial productivity generally depends on certain factors that are really more psychological in kind than of any given technological aspect.	['American industrial productivity depends more on psychological than on technological factors.']	4	https://owl.purdue.edu/owl/general_writing/academic_writing/reverse_paramedic_method.html
194	purdue_writing_lab_2021	The supply manager considered the correcting typewriter an unneeded luxury.	['The supply manager considered the correcting typewriter a luxury.']	2	https://owl.purdue.edu/owl/general_writing/academic_writing/reverse_paramedic_method.html
195	purdue_writing_lab_2021	Before the travel agent was completely able to finish explaining the various differences among all of the many very unique vacation packages his travel agency was offering, the customer changed her future plans.	['Before the travel agent finished explaining the differences among the unique vacation packages his travel agency was offering, the customer changed her plans.']	2	https://owl.purdue.edu/owl/general_writing/academic_writing/reverse_paramedic_method.html
196	purdue_writing_lab_2021	During that time period, many car buyers preferred cars that were pink in color and shiny in appearance.	['During that period, many car buyers preferred pink, shiny cars.']	1	https://owl.purdue.edu/owl/general_writing/academic_writing/reverse_paramedic_method.html
197	purdue_writing_lab_2021	The microscope revealed a group of organisms that were round in shape and peculiar in nature.	['The microscope revealed a group of peculiar, round organisms.']	2	https://owl.purdue.edu/owl/general_writing/academic_writing/reverse_paramedic_method.html
198	purdue_writing_lab_2021	Jeff Converse, our chief of consulting, suggested at our last board meeting the installation of microfilm equipment in the department of data processing.	['At our last board meeting, Chief Consultant Jeff Converse suggested that we install microfilm equipment in the data processing department.']	5	https://owl.purdue.edu/owl/general_writing/academic_writing/reverse_paramedic_method.html
199	purdue_writing_lab_2021	We read the letter we received yesterday and reviewed it thoroughly.	['We thoroughly read the letter we received yesterday.']	1	https://owl.purdue.edu/owl/general_writing/academic_writing/reverse_paramedic_method.html
200	purdue_writing_lab_2021	As you carefully read what you have written to improve your wording and catch small errors of spelling, punctuation, and so on, the thing to do before you do anything else is to try to see where a series of words expressing action could replace the ideas found in nouns rather than verbs.	['As you edit, first find nominalizations that you can replace with verb phrases.']	4	https://owl.purdue.edu/owl/general_writing/academic_writing/reverse_paramedic_method.html
201	purdue_writing_lab_2021	An account was opened by Mrs. Simms.	['Mrs. Simms opened an account.']	1	https://owl.purdue.edu/owl/general_writing/academic_writing/reverse_paramedic_method.html
202	purdue_writing_lab_2021	Your figures were checked by the research department.	['The research department checked your figures.']	3	https://owl.purdue.edu/owl/general_writing/academic_writing/reverse_paramedic_method.html
203	purdue_writing_lab_2021	It is the governor who signs or vetoes bills.	['The governor signs or vetoes bills.']	1	https://owl.purdue.edu/owl/general_writing/academic_writing/reverse_paramedic_method.html
204	purdue_writing_lab_2021	There are four rules that should be observed.	['Four rules should be observed.']	1	https://owl.purdue.edu/owl/general_writing/academic_writing/reverse_paramedic_method.html
205	purdue_writing_lab_2021	There was a big explosion, which shook the windows, and people ran into the street.	['A big explosion shook the windows, and people ran into the street.']	1	https://owl.purdue.edu/owl/general_writing/academic_writing/reverse_paramedic_method.html
206	purdue_writing_lab_2021	The function of this department is the collection of accounts.	['This department collects accounts.']	3	https://owl.purdue.edu/owl/general_writing/academic_writing/reverse_paramedic_method.html
207	purdue_writing_lab_2021	The current focus of the medical profession is disease prevention.	['The medical profession currently focuses on disease prevention.']	3	https://owl.purdue.edu/owl/general_writing/academic_writing/reverse_paramedic_method.html
208	purdue_writing_lab_2021	The duty of a clerk is to check all incoming mail and to record it.	['A clerk checks and records all incoming mail.']	3	https://owl.purdue.edu/owl/general_writing/academic_writing/reverse_paramedic_method.html
209	purdue_writing_lab_2021	A shortage of tellers at our branch office on Friday and Saturday during rush hours has caused customers to become dissatisfied with service.	['A teller shortage at our branch office on Friday and Saturday during rush hours has caused customer dissatisfaction.']	5	https://owl.purdue.edu/owl/general_writing/academic_writing/reverse_paramedic_method.html
210	purdue_writing_lab_2021	It is possible that nothing will come of these preparations.	['Nothing may come of these preparations.']	3	https://owl.purdue.edu/owl/general_writing/academic_writing/reverse_paramedic_method.html
211	purdue_writing_lab_2021	She has the ability to influence the outcome.	['She can influence the outcome.']	2	https://owl.purdue.edu/owl/general_writing/academic_writing/reverse_paramedic_method.html
212	purdue_writing_lab_2021	It is necessary that we take a stand on this pressing issue.	['We must take a stand on this pressing issue.']	3	https://owl.purdue.edu/owl/general_writing/academic_writing/reverse_paramedic_method.html
213	purdue_writing_lab_2021	The point I wish to make is that the employees working at this company are in need of a much better manager of their money.	['Employees at this company need a better money manager.']	1	https://owl.purdue.edu/owl/general_writing/academic_writing/reverse_paramedic_method.html
214	purdue_writing_lab_2021	It is widely known that the engineers at Sandia Labs have become active participants in the Search and Rescue operations in most years.	['In recent years, engineers at Sandia Labs have participated in the Search and Rescue operations.']	3	https://owl.purdue.edu/owl/general_writing/academic_writing/reverse_paramedic_method.html
215	purdue_writing_lab_2021	After reviewing the results of your previous research, and in light of the relevant information found within the context of the study, there is ample evidence for making important, significant changes to our operating procedures.	['After reviewing the results of your research, and within the context of the study, we find evidence supporting significant changes in our operating procedures.']	3	https://owl.purdue.edu/owl/general_writing/academic_writing/reverse_paramedic_method.html
216	purdue_writing_lab_2021	The experiment was conducted at 1330 GMT and was conducted with an increased basal rate with a double bolus.	['The experiment was conducted at 1330 GMT using an increased basal rate and a double bolus.']	2	https://owl.purdue.edu/owl/general_writing/academic_writing/reverse_paramedic_method.html
217	purdue_writing_lab_2021	The baseball game was attended by Morgan Latour.	['Morgan Latour attended the baseball game.']	3	https://owl.purdue.edu/owl/general_writing/academic_writing/reverse_paramedic_method.html
218	purdue_writing_lab_2021	In the following experiment, we used the feline cell line, W9, to evaluate cell growth in the presence of the growth factor.	['The feline cell line W9 was used to evaluate cell growth in the presence of growth factor.']	6	https://owl.purdue.edu/owl/general_writing/academic_writing/reverse_paramedic_method.html
219	purdue_writing_lab_2021	During the procedure, we cultured the cells for 48 hours in media that we modified with 78, 80, 90, and 110 ng/mL BMP.	['Cells were cultured for 48 hours in media modified with 78, 80, 90, and 110 ng/mL BMP.']	6	https://owl.purdue.edu/owl/general_writing/academic_writing/reverse_paramedic_method.html
220	purdue_writing_lab_2021	At 48 hours, we harvested cells from the cell culture dish and counted; we used a hemocytometer.	['At 48 hours, cells were harvested from the culture dish and counted using hemocytometer.']	3	https://owl.purdue.edu/owl/general_writing/academic_writing/reverse_paramedic_method.html
221	hamilton_2021	Usner's work is an attempt at revision of orthodox historiography.	['Usner attempts to revise orthodox historiography.']	3	https://www.hamilton.edu/academics/centers/writing/writing-resources/eliminating-wordiness
222	hamilton_2021	An example of thorough analysis is when Tierney cites Wiseman's extensive data.	["Tierney's citing of Wiseman's extensive data exemplifies thorough analysis."]	3	https://www.hamilton.edu/academics/centers/writing/writing-resources/eliminating-wordiness
223	hamilton_2021	The process of modernization in any society is seen as a positive change.	['Most people see modernization in a society as a positive change.']	3	https://www.hamilton.edu/academics/centers/writing/writing-resources/eliminating-wordiness
224	hamilton_2021	Donner's misuse of information is exposed by the facts.	["The facts expose Donner's misuse of information."]	3	https://www.hamilton.edu/academics/centers/writing/writing-resources/eliminating-wordiness
225	hamilton_2021	Successful globalization depends on factors that involve culture more than economics.	['Successful globalization depends more on culture than economics.']	1	https://www.hamilton.edu/academics/centers/writing/writing-resources/eliminating-wordiness
226	hamilton_2021	Tom Jones is a novel that comically portrays English society in the eighteenth century.	['The novel Tom Jones comically portrays eighteenth century English society.']	3	https://www.hamilton.edu/academics/centers/writing/writing-resources/eliminating-wordiness
227	hamilton_2021	There are indications of Privo's misunderstanding of natural selection in her argument.	["Privo's argument demonstrates her misunderstanding of natural selection."]	3	https://www.hamilton.edu/academics/centers/writing/writing-resources/eliminating-wordiness
228	hamilton_2021	Modern society is in need of a recalibration of its moral values.	['Modern society needs to recalibrate its moral values.']	2	https://www.hamilton.edu/academics/centers/writing/writing-resources/eliminating-wordiness
229	hamilton_2021	Attempts by economists at defining full employment have been met with failure.	["Economists' attempts at defining full employment have failed."]	2	https://www.hamilton.edu/academics/centers/writing/writing-resources/eliminating-wordiness
230	hamilton_2021	One of the most important indications of the sensorimotor period is the development of object permanence.	['The development of object permanence is a key indicator of the sensorimotor period.']	5	https://www.hamilton.edu/academics/centers/writing/writing-resources/eliminating-wordiness
231	ioyno_2021	Bill is kicked by Jim.	['Jim kicks Bill.']	3	https://success.loyno.edu/sites/default/files/2021-07/paramedic-revision.pdf
232	ioyno_2021	Bill screamed loudly as he was being kicked very forcefully by Jim.	['Bill screamed as Jim kicked him forcefully.']	5	https://success.loyno.edu/sites/default/files/2021-07/paramedic-revision.pdf
233	ioyno_2021	This manual of instructions was prepared by our company to aid and assist our dealers in being helpful to their customers.	['Our company prepared this instruction manual to help our dealers serve their customers.']	7	https://success.loyno.edu/sites/default/files/2021-07/paramedic-revision.pdf
234	rcsj_2021	As a result of an infraction of a minor nature, Jonathan was kicked in the shin by Matthew, which caused Jonathan pain of a medium degree.	['After Jonathan committed a minor infraction, Mathew kicked Jonathan in the shin, causing Jonathan pain.']	7	https://www.rcsj.edu/Tutoring-site/Gloucester-site/Documents/Paramedic%20Method.pdf
235	antioch_2021	The author's intention of the article is to argue for the elimination of the passivity of the learner in college through using recent studies that show the value of collaborative learning in the classroom environment.	['The author cites recent research and argues for collaboration as a way to eliminate passivity and stimulate classroom active learning.']	5	https://www.antioch.edu/wp-content/uploads/2017/02/VWC-The-Paramedic-Method.pdf
236	antioch_2021	The new interpretations on canine aggressive behavior researched by Cesar Milano are actually conceived by using a method that originally was used by Skinner and the early scholars in behaviorism.	['Cesar Millan uses Behaviorism in researching canine aggression.']	3	https://www.antioch.edu/wp-content/uploads/2017/02/VWC-The-Paramedic-Method.pdf
237	mcdaniel_college_2021	In this paragraph is a demonstration of the use of good style in the writing of a report.	['This paragraph demonstrates good style in report writing.']	5	https://writingcenter.mcdaniel.edu/owl_handout/the-paramedic-method/
238	mcdaniel_college_2021	The point that I wish to make is that the employees working at this company are in need of a much better manager of their money.	["This company's employees need a much better money manager."]	4	https://writingcenter.mcdaniel.edu/owl_handout/the-paramedic-method/
239	uiowa_2021	If the two materials have drastically different coefficients of expansion, the difference in the rates of expansion will cause stress on the coupling and will cause the point where the two materials are joined to become weak and less secure.	['Joining two materials with significantly different coefficients of expansion can cause stress in the coupling due to the different rates of expansion, weakening the joint.']	7	https://engineering.uiowa.edu/sites/engineering.uiowa.edu/files/2021-03/reverse_paramedic_method_adams_neva.pdf
240	uiowa_2021	Before we ran any of the tests, we measured the cross-sectional width and thickness of the sample as well as the initial length of the sample.	['The initial length, thickness, and cross-sectional width of the sample were measured before running the tests.']	6	https://engineering.uiowa.edu/sites/engineering.uiowa.edu/files/2021-03/reverse_paramedic_method_adams_neva.pdf
241	ucf_2021	I think that all I can usefully say on this point is that in the normal course of their professional activities social anthropologists are usually concerned with the third of these alternatives, while the other two levels are treated as raw data for analysis.	['Social anthropologists usually concentrate on the third alternative, treating the other two as raw data.']	7	https://uwc.cah.ucf.edu/wp-content/uploads/sites/9/2015/04/paramedic_method.pdf
242	csbsju_2021	The best teachers help each student become a better student both academically and emotionally.	['The best teachers help each student grow both academically and emotionally.']	2	https://www.csbsju.edu/Documents/Writing%20Centers/concise%20sentences.pdf
243	csbsju_2021	It is imperative that all night managers follow strict procedures when locking the safe.	['All night managers must follow strict procedures when locking the safe.']	3	https://www.csbsju.edu/Documents/Writing%20Centers/concise%20sentences.pdf
244	cmu_2021	The migration away from Java to Singapore by the British Royal Navy, which was a westward shifting of their base of power in Southeast Asia, was also the dominant factor in ensuring the Dutch were able to control Indonesia for decades.	['The British Royal Navy migrated from Java to Singapore, shifting their Southeast Asian power base westward and ensuring the Dutch controlled Indonesia for decades.']	5	https://www.cmu.edu/student-success/other-resources/handouts/comm-supp-pdfs/creating-concise-sentences.pdf
245	butte_2021	There are problems with the lease.	['The lease has problems.']	3	http://www.butte.edu/departments/cas/tipsheets/style_purpose_strategy/writing_clearly.html
246	butte_2021	There are several good reasons to delay making this decision.	['We should delay making this decision for several reasons.']	3	http://www.butte.edu/departments/cas/tipsheets/style_purpose_strategy/writing_clearly.html
247	butte_2021	There is a natural desire among adolescents to experience freedom from authority.	['Adolescents naturally crave freedom from authority.']	3	http://www.butte.edu/departments/cas/tipsheets/style_purpose_strategy/writing_clearly.html
248	butte_2021	There is a requirement that all students have an evaluation of their transcripts for placement purposes or to meet a prerequisite.	['The college requires that the admissions office evaluate all student transcripts for placement and prerequisites.']	3	http://www.butte.edu/departments/cas/tipsheets/style_purpose_strategy/writing_clearly.html
249	uark_2021	That sofa is large in size.	['That sofa is large.']	1	https://walton.uark.edu/business-communication-lab/Resources/downloads/Concise_Writing.pdf
250	uark_2021	Compulsory attendance at social events is required.	['Attendance at social events is required.']	1	https://walton.uark.edu/business-communication-lab/Resources/downloads/Concise_Writing.pdf
251	uark_2021	The housing situation can have a big impact on the social aspect of a student's life.	["Housing can influence a student's life."]	2	https://walton.uark.edu/business-communication-lab/Resources/downloads/Concise_Writing.pdf
252	uark_2021	I think that there are too many issues with this computer.	['There are too many issues with this computer.']	1	https://walton.uark.edu/business-communication-lab/Resources/downloads/Concise_Writing.pdf
253	uark_2021	The point that I wish to make is that Google is a very effective and innovative company.	['Google is an effective and innovative company.']	4	https://walton.uark.edu/business-communication-lab/Resources/downloads/Concise_Writing.pdf
254	uark_2021	The fact of the matter is that culture is a complicated term to define.	['Culture is a complicated term to define.']	1	https://walton.uark.edu/business-communication-lab/Resources/downloads/Concise_Writing.pdf
255	ding_2021	There is general agreement among climate scientists as to the elevation of global temperatures as a result of carbon dioxide in the atmosphere.	['Most climate scientists agree that carbon dioxide in the atmosphere is elevating global temperatures.']	3	https://emedia.rmit.edu.au/learninglab/content/be-concise
256	ding_2021	Engineers cannot avoid utilising complex and difficult technical terms in order to clearly analyse requirements and describe them in a precise and meaningful way.	['Engineers must use technical terms when writing clear requirements specifications.']	3	https://emedia.rmit.edu.au/learninglab/content/be-concise
257	ding_2021	Attempts by researchers at identification of the AIDS virus have met with success; however, attempts at development of a vaccine for the immunisation of those at risk have failed.	['AIDS researchers have identified the AIDS virus but have failed to develop a vaccine that will immunise those at risk.']	3	https://emedia.rmit.edu.au/learninglab/content/be-concise
258	ding_2021	Any departures by the members from established procedures may cause termination of membership by the Board.	['If members depart from established procedures, their membership may be terminated by the Board.']	3	https://emedia.rmit.edu.au/learninglab/content/be-concise
259	ding_2021	Employability actually depends on certain factors that basically involve generic skills, such as ability to communicate, as much as any particular technical disciplinary knowledge.	['Employability depends on generic skills, such as ability to communicate, as much as disciplinary knowledge.']	1	https://emedia.rmit.edu.au/learninglab/content/be-concise
260	ding_2021	Going forward, it is recommended that such kinds of issues be considered in the future planning process.	['It is recommended that such issues be considered in the planning process.']	1	https://emedia.rmit.edu.au/learninglab/content/be-concise
261	middlebury_2021	It is interesting to note that the fascinating creature called the common poorwill is actually known to hibernate in the wintertime, going into a deep sleep during the coldest months of the year.	['Common poorwills hibernate in the winter.']	4	https://sites.middlebury.edu/middsciwriting/overview/professionalism/conciseness/
262	middlebury_2021	Both of the two samples had very similar concentrations.	['The two samples had similar concentrations.']	1	https://sites.middlebury.edu/middsciwriting/overview/professionalism/conciseness/
263	middlebury_2021	The results suggest that it may be possible to start to show how lasers may be used in such a way.	['The results suggest how lasers may be used in this way.']	4	https://sites.middlebury.edu/middsciwriting/overview/professionalism/conciseness/
264	middlebury_2021	An experiment helps elucidate the transition of charge carriers from polaronic metal states to insulating ordered states.	['Charge carriers can transition from polaronic metal states to insulating ordered states.']	3	https://sites.middlebury.edu/middsciwriting/overview/professionalism/conciseness/
265	middlebury_2021	Unfortunately, inferred mass changes using the gravity field solutions obtained by the groups we previously mentioned do not agree to a level that is considered truly acceptable.	['Inferred mass changes using the gravity field solutions obtained by aforementioned groups do not agree to an acceptable level.']	4	https://sites.middlebury.edu/middsciwriting/overview/professionalism/conciseness/
266	middlebury_2021	At some point in the future, the incredible field of research known as molecular dynamics simulations could be used in this way for use with plant DNA and nanoparticles to potentially provide an insight into changes observed here in plant health and output.	['Molecular dynamics simulations of plant DNA and nanoparticles could provide an insight into changes observed in plant health and output.']	1	https://sites.middlebury.edu/middsciwriting/overview/professionalism/conciseness/
267	middlebury_2021	It is interesting to note that our results show that the topological states are remarkably robust and that their dispersion has the capacity to be tuned in the range that we explored here (m=0-3; n=1) as well as in bulk Sb.	['Our results show that the topological states are remarkably robust and that their dispersion can be tuned in the explored range (m=0-3; n=1) and in bulk Sb.']	4	https://sites.middlebury.edu/middsciwriting/overview/professionalism/conciseness/
268	middlebury_2021	Experiments performed using reverse transcriptase-polymerase chain reaction obviously demonstrated that the hTRT mRNA originated from the cDNA that had been transfected and not the endogenous gene.	['Reverse transcriptase-polymerase chain reaction experiments demonstrated that the hTRT mRNA originated from the transfected cDNA and not the endogenous gene.']	1	https://sites.middlebury.edu/middsciwriting/overview/professionalism/conciseness/
269	berkeley_2021	The stepmother's house was cleaned by Cinderella.	["Cinderella cleaned the stepmother's house."]	3	https://slc.berkeley.edu/writing-worksheets-and-other-writing-resources/nine-basic-ways-improve-your-style-academic-writing
270	berkeley_2021	The stepsisters were jealous and envious.	['The stepsisters were jealous. ', ' The stepsisters were envious.']	1	https://slc.berkeley.edu/writing-worksheets-and-other-writing-resources/nine-basic-ways-improve-your-style-academic-writing
271	berkeley_2021	The mystery lady was one who every eligible man at the ball admired.	['Every eligible man at the ball admired the mystery lady.']	3	https://slc.berkeley.edu/writing-worksheets-and-other-writing-resources/nine-basic-ways-improve-your-style-academic-writing
272	nus_2021	The research of Yuan et al. (2007) on sustainable architecture in Singapore is considered to be the cream of the crop.	['The research of Yuan et al. (2007) on sustainable architecture in Singapore is considered to be the best.']	3	https://www.nus.edu.sg/celc/research/books/cwtuc/chapter03.pdf
273	nus_2021	The veteran researcher has churned out many articles in recent years.	['The veteran researcher has produced many articles in recent years.']	2	https://www.nus.edu.sg/celc/research/books/cwtuc/chapter03.pdf
274	nus_2021	The team that was hurriedly put together has not been productive because the members do not share common objectives.	['The team that was hurriedly assembled has not been productive because the members do not share common objectives.']	2	https://www.nus.edu.sg/celc/research/books/cwtuc/chapter03.pdf
275	nus_2021	In his attempt to establish absolute control, the dictator sought to wipe out all who were opposed to his rule.	['In his attempt to establish absolute control, the dictator sought to eliminate all who were opposed to his rule.']	2	https://www.nus.edu.sg/celc/research/books/cwtuc/chapter03.pdf
276	nus_2021	The auditors' report suggests that the treasurer had tried to cover up the fi nancial irregularities.	["The auditors' report suggests that the treasurer had tried to hide the fi nancial irregularities."]	2	https://www.nus.edu.sg/celc/research/books/cwtuc/chapter03.pdf
277	nus_2021	We must be prepared for discomfort in various sectors if we want to bring about change in the system.	['We must be prepared for discomfort in various sectors if we want to effect change in the system.']	2	https://www.nus.edu.sg/celc/research/books/cwtuc/chapter03.pdf
278	kuleuven_2021	In the following, I will argue that there is a need for alternative punishments.	['The following will argue that there is a need for alternative punishments.']	1	https://ppw.kuleuven.be/en/student-portal/thesis/acwriting
279	kuleuven_2021	I think the potential mismatch is particularly important.	['The potential mismatch is particularly important.']	1	https://ppw.kuleuven.be/en/student-portal/thesis/acwriting
280	kuleuven_2021	I find it surprising that these reasons were completely neglected.	['Surprisingly, these reasons were completely neglected.']	2	https://ppw.kuleuven.be/en/student-portal/thesis/acwriting
281	kuleuven_2021	This is the basic background on which he bases his thinking on popular music.	['He based his thinking on popular music on the aforementioned theories.']	3	https://ppw.kuleuven.be/en/student-portal/thesis/acwriting
282	wisc_2021	It is believed by the candidate that a ceiling must be placed on the budget by Congress.	['The candidate believes that Congress must place a ceiling on the budget.']	3	https://writing.wisc.edu/handbook/style/
283	wisc_2021	The man was bitten by the dog.	['The dog bit the man.']	3	https://writing.wisc.edu/handbook/style/
284	wisc_2021	The establishment of a different approach on the part of the committee has become a necessity.	['The committee has to approach it differently.']	3	https://writing.wisc.edu/handbook/style/
285	wisc_2021	An evaluation of the procedures needs to be done.	['We need to evaluate the procedures.']	3	https://writing.wisc.edu/handbook/style/
286	wisc_2021	The procedures need to be evaluated.	['We need to evaluate the procedures.']	3	https://writing.wisc.edu/handbook/style/
287	wisc_2021	The stability and quality of our financial performance will be developed through the profitable execution of our existing business, as well as the acquisition or development of new businesses.	['We will improve our financial performance not only by executing our existing business more profitably but by acquiring or developing new businesses.']	5	https://writing.wisc.edu/handbook/style/
288	wisc_2021	In a situation in which a class is overenrolled, you may request that the instructor force-add you.	['When a class is overenrolled, you may ask the instructor to force-add you.']	2	https://writing.wisc.edu/handbook/style/
289	wisc_2021	I will now make a few observations concerning the matter of contingency funds.	['I will now make a few observations about contingency funds.']	2	https://writing.wisc.edu/handbook/style/
290	wisc_2021	The obvious effect of such a range of reference is to assure the audience of the author's range of learning and intellect.	['The wide-ranging references in this talk assure the audience that the author is intelligent and well-read.']	3	https://writing.wisc.edu/handbook/style/
291	wisc_2021	It is a matter of the gravest possible importance to the health of anyone with a history of a problem with disease of the heart that he or she should avoid the sort of foods with a high percentage of saturated fats.	['Anyone with a history of heart disease should avoid saturated fats.']	6	https://writing.wisc.edu/handbook/style/
292	wisc_2021	It was her last argument that finally persuaded me.	['Her last argument finally persuaded me.']	1	https://writing.wisc.edu/handbook/style/
293	wisc_2021	There are likely to be many researchers raising questions about this methodological approach.	['Many researchers are likely to raise questions about this methodological approach.']	3	https://writing.wisc.edu/handbook/style/
294	wisc_2021	It is inevitable that oil prices will rise.	['Oil prices will inevitably rise.']	3	https://writing.wisc.edu/handbook/style/
295	wisc_2021	Consumer demand is rising in the area of services.	['Consumers are demanding more services.']	3	https://writing.wisc.edu/handbook/style/
296	wisc_2021	Strong reading skills are an important factor in students' success in college.	["Students' success in college depends on their reading skills."]	3	https://writing.wisc.edu/handbook/style/
297	wisc_2021	MHS has a hospital employee relations improvement program.	['MHS has a program to improve relations among employees.']	3	https://writing.wisc.edu/handbook/style/
298	gmu_2020	The magazines that are on the table belong to me.	['The magazines on the table belong to me.']	1	https://writingcenter.gmu.edu/guides/using-reduced-relative-clauses-to-write-concisely
299	gmu_2020	Students who are living on campus will receive a refund.	['Students living on campus will receive a refund.']	1	https://writingcenter.gmu.edu/guides/using-reduced-relative-clauses-to-write-concisely
300	gmu_2020	The scholar who had been nominated for the award published another article.	['The scholar nominated for the award published another article.']	1	https://writingcenter.gmu.edu/guides/using-reduced-relative-clauses-to-write-concisely
301	gmu_2020	On domestic flights that last at least three hours, a meal is served.	['On domestic flights lasting at least three hours, a meal is served.']	2	https://writingcenter.gmu.edu/guides/using-reduced-relative-clauses-to-write-concisely
302	cityu_2021	The project is one of complexity.	['It is a complex project.']	3	https://www.lc.cityu.edu.hk/ELSS/Resource/Concise_writing_-_package_2/
303	cityu_2021	IT assisted in the maintenance of the database.	['IT helped to maintain the database.']	2	https://www.lc.cityu.edu.hk/ELSS/Resource/Concise_writing_-_package_2/
304	cityu_2021	Everyone's co-operation is of vital importance.	["It's very important for everyone to co-operate."]	5	https://www.lc.cityu.edu.hk/ELSS/Resource/Concise_writing_-_package_2/
305	cityu_2021	The Equal Opportunities Commission (EOC) is responsible for the implementation of anti-discrimination legislation.	['The Equal Opportunities Commission (EOC) is responsible for implementing anti-discrimination legislation.']	2	https://www.lc.cityu.edu.hk/ELSS/Resource/Concise_writing_-_package_2/
306	cityu_2021	We have conducted an investigation and arrived at the conclusion.	['We have investigated and concluded.']	2	https://www.lc.cityu.edu.hk/ELSS/Resource/Concise_writing_-_package_2/
307	cityu_2021	I have made some enquiries.	['I have enquired.']	2	https://www.lc.cityu.edu.hk/ELSS/Resource/Concise_writing_-_package_2/
308	cityu_2021	We are making arrangements.	['We are arranging.']	2	https://www.lc.cityu.edu.hk/ELSS/Resource/Concise_writing_-_package_2/
309	cityu_2021	We are in receipt of your proposal dated 26 January.	['We have received your proposal of 26 January.']	2	https://www.lc.cityu.edu.hk/ELSS/Resource/Concise_writing_-_package_2/
310	cityu_2021	Upon completion of the tendering process, the project can be awarded to the successful bidder.	['When the tendering process is completed, we will award the project to the successful bidder.']	3	https://www.lc.cityu.edu.hk/ELSS/Resource/Concise_writing_-_package_2/
311	cityu_2021	Arrangements have been made to make the payment to you next Monday.	['We will pay you next Monday.']	3	https://www.lc.cityu.edu.hk/ELSS/Resource/Concise_writing_-_package_2/
312	cityu_2021	In order to facilitate the implementation of the new strategic plan, we require the assistance of either one or two experienced specialists.	['To implement the new plan, we need two specialist staff.']	4	https://www.lc.cityu.edu.hk/ELSS/Resource/Concise_writing_-_package_2/
313	cityu_2021	Consuello Calvin, our Chief Consultant, suggested at our last board meeting the installation of new software to enhance security protection.	['At our last board meeting, Chief Consultant Consuello Calvin suggested that we install new security protection software.']	3	https://www.lc.cityu.edu.hk/ELSS/Resource/Concise_writing_-_package_2/
314	cityu_2021	I am currently engaged in a study of the target market.	['I am studying the target market at the moment.']	2	https://www.lc.cityu.edu.hk/ELSS/Resource/Concise_writing_-_package_2/
315	cityu_2021	We didn't renew the contract with our supplier on account of the fact that it was necessary for us to find a cheaper supplier.	["We didn't renew the contract with our supplier because we had to find a cheaper one."]	5	https://www.lc.cityu.edu.hk/ELSS/Resource/Concise_writing_-_package_2/
316	cityu_2021	It is important that you read the notes, advice and information detailed opposite then complete the form overleaf (all sections) prior to its immediate return to the bank by way of the envelope provided.	['Please read the attached information and complete and return the form.']	5	https://www.lc.cityu.edu.hk/ELSS/Resource/Concise_writing_-_package_2/
317	cityu_2021	In the event that there is a fire on the premises, it is vitally important that you shall leave the premises as soon as you hear the alarm bell ringing.	['If you hear the fire alarm, please leave the building.']	7	https://www.lc.cityu.edu.hk/ELSS/Resource/Concise_writing_-_package_2/
318	cityu_2021	My team of staff and I are committed to maintaining and the promotion of Hong Kong as a major international financial centre.	['My team of staff and I are committed to maintaining and promoting Hong Kong as a major international financial centre.']	3	https://www.lc.cityu.edu.hk/ELSS/Resource/Concise_writing_-_package_2/
319	yale_nus_2021	Thomas Jefferson's support of the new Constitution was documented in a letter to James Madison.	['Thomas Jefferson documented his support of the new Constitution in a letter to James Madison.']	3	https://writerscentre.yale-nus.edu.sg/wp-content/uploads/sites/7/2019/07/Hamilton-College-7-Deadly-Sins-of-Writing.pdf
320	yale_nus_2021	It is the combination of these two elements that makes the argument weak.	['The combination of these two elements weakens the argument.']	3	https://writerscentre.yale-nus.edu.sg/wp-content/uploads/sites/7/2019/07/Hamilton-College-7-Deadly-Sins-of-Writing.pdf
321	yale_nus_2021	The reason that General Lee invaded Pennsylvania in June 1863 was to draw the Army of the Potomac away from Richmond.	['General Lee invaded Pennsylvania in June 1863 to draw the Army of the Potomac away from Richmond.']	1	https://writerscentre.yale-nus.edu.sg/wp-content/uploads/sites/7/2019/07/Hamilton-College-7-Deadly-Sins-of-Writing.pdf
322	yale_nus_2021	Tom Jones is a novel by Fielding that comically portrays English society in the eighteenth century.	["Fielding's novel Tom Jones comically portrays English society in the eighteenth century."]	3	https://writerscentre.yale-nus.edu.sg/wp-content/uploads/sites/7/2019/07/Hamilton-College-7-Deadly-Sins-of-Writing.pdf
323	yale_nus_2021	In Crew's argument there are many indications of her misunderstanding of natural selection.	["Crew's argument repeatedly demonstrates misunderstanding of natural selection."]	3	https://writerscentre.yale-nus.edu.sg/wp-content/uploads/sites/7/2019/07/Hamilton-College-7-Deadly-Sins-of-Writing.pdf
324	yale_nus_2021	In the original state constitution, they allowed polygamy.	['The original state constitution allowed polygamy.']	1	https://writerscentre.yale-nus.edu.sg/wp-content/uploads/sites/7/2019/07/Hamilton-College-7-Deadly-Sins-of-Writing.pdf
325	yale_nus_2021	Each student must meet his or her advisor.	['Students must meet with their advisors.']	2	https://writerscentre.yale-nus.edu.sg/wp-content/uploads/sites/7/2019/07/Hamilton-College-7-Deadly-Sins-of-Writing.pdf
326	uvalawyer_2021	The majority opinion contains a discussion of legislative history.	['The majority opinion discusses legislative history.']	2	https://www.law.virginia.edu/uvalawyer/article/4-tips-more-concise-legal-writing
327	hotaling_2020	If you find yourself swimming in the ocean, be wary of sharks.	['Be wary of sharks when swimming in the ocean.']	3	https://aslopubs.onlinelibrary.wiley.com/doi/full/10.1002/lol2.10165
328	nps_2021	We conducted an investigation of the accident.	['We investigated the accident.']	2	https://nps.edu/documents/111693070/112854021/TheParamedicMethod+JMGay+handout.pdf/6a68bbc1-8fcc-4b1f-94d3-c37bb268ed9e?t=1546651719000
329	nps_2021	In each picture, the responses are shown.	['Each picture shows the responses.']	3	https://nps.edu/documents/111693070/112854021/TheParamedicMethod+JMGay+handout.pdf/6a68bbc1-8fcc-4b1f-94d3-c37bb268ed9e?t=1546651719000
330	nps_2021	It has been found experimentally that genetically altered strawberries are frost-resistant.	['In this experiment, we found that genetically altered strawberries are frost-resistant.']	3	https://nps.edu/documents/111693070/112854021/TheParamedicMethod+JMGay+handout.pdf/6a68bbc1-8fcc-4b1f-94d3-c37bb268ed9e?t=1546651719000
331	nps_2021	Indirect predator control is the exclusion of predators through means.	['Indirect predator control excludes predators through means.']	2	https://nps.edu/documents/111693070/112854021/TheParamedicMethod+JMGay+handout.pdf/6a68bbc1-8fcc-4b1f-94d3-c37bb268ed9e?t=1546651719000
332	nps_2021	The increasing electrical output requires the addition of extra modules.	['The increasing electrical output requires adding extra modules.']	2	https://nps.edu/documents/111693070/112854021/TheParamedicMethod+JMGay+handout.pdf/6a68bbc1-8fcc-4b1f-94d3-c37bb268ed9e?t=1546651719000
333	nps_2021	Early childhood thought disorders misdiagnosis often occurs as a result of unfamiliarity with recent research literature describing such conditions.	['Physicians unfamiliar with the literature on recent research often misdiagnose disordered thought in young children.']	3	https://nps.edu/documents/111693070/112854021/TheParamedicMethod+JMGay+handout.pdf/6a68bbc1-8fcc-4b1f-94d3-c37bb268ed9e?t=1546651719000
334	nps_2021	There are several advantages to genetic screening.	['Genetic screening presents several advantages.']	3	https://nps.edu/documents/111693070/112854021/TheParamedicMethod+JMGay+handout.pdf/6a68bbc1-8fcc-4b1f-94d3-c37bb268ed9e?t=1546651719000
335	nps_2021	There has been a lot of research done to determine its causes.	['Much research has been done to determine its causes.']	3	https://nps.edu/documents/111693070/112854021/TheParamedicMethod+JMGay+handout.pdf/6a68bbc1-8fcc-4b1f-94d3-c37bb268ed9e?t=1546651719000
336	nps_2021	There were many factors that affected this situation.	['Many factors affected this situation.']	1	https://nps.edu/documents/111693070/112854021/TheParamedicMethod+JMGay+handout.pdf/6a68bbc1-8fcc-4b1f-94d3-c37bb268ed9e?t=1546651719000
337	nps_2021	It is recommended that we complete more research.	['We should complete more research.']	3	https://nps.edu/documents/111693070/112854021/TheParamedicMethod+JMGay+handout.pdf/6a68bbc1-8fcc-4b1f-94d3-c37bb268ed9e?t=1546651719000
338	nps_2021	It is our goal to serve the university community.	['Our goal is to serve the university community.']	1	https://nps.edu/documents/111693070/112854021/TheParamedicMethod+JMGay+handout.pdf/6a68bbc1-8fcc-4b1f-94d3-c37bb268ed9e?t=1546651719000
339	nps_2021	The new regulations could cause problems for both the winners and for those who lose.	['The new regulations could cause problems for both winners and losers.']	2	https://nps.edu/documents/111693070/112854021/TheParamedicMethod+JMGay+handout.pdf/6a68bbc1-8fcc-4b1f-94d3-c37bb268ed9e?t=1546651719000
340	nps_2021	Everyone should be cognizant of the danger of explosion.	['Everyone should be aware of the danger of explosion.']	2	https://nps.edu/documents/111693070/112854021/TheParamedicMethod+JMGay+handout.pdf/6a68bbc1-8fcc-4b1f-94d3-c37bb268ed9e?t=1546651719000
341	nps_2021	Utilization of crystal clear goals and objectives will optimize our capacity to prioritize our concerns so that we will impact upon the major thrust of our company's future plans and prospects.	["If we clarify our goals and objectives, we will be better able to concentrate on what is most important for our company's future."]	5	https://nps.edu/documents/111693070/112854021/TheParamedicMethod+JMGay+handout.pdf/6a68bbc1-8fcc-4b1f-94d3-c37bb268ed9e?t=1546651719000
342	nps_2021	After a time interval of one to two minutes, the tone usually stops.	['After one to two minutes, the tone usually stops.']	1	https://nps.edu/documents/111693070/112854021/TheParamedicMethod+JMGay+handout.pdf/6a68bbc1-8fcc-4b1f-94d3-c37bb268ed9e?t=1546651719000
343	nps_2021	Another activity that I would use my computer for is the wordprocessing software package.	['I would also use my computer for wordprocessing.']	6	https://nps.edu/documents/111693070/112854021/TheParamedicMethod+JMGay+handout.pdf/6a68bbc1-8fcc-4b1f-94d3-c37bb268ed9e?t=1546651719000
344	umass_2021	In response to the issue of equality for educational and occupational mobility, it is my belief that a system of gender inequality exists in the school system.	['I believe that gender inequality exists in the schools.']	6	https://people.umass.edu/curtis/academics/editingtoolbox/Lanham_LardFactor.pdf
345	celia_2021	The human immune system is responsible not only for the identification of foreign molecules, but also for actions leading to their immobilization, neutralization, and destruction.	['The human immune system not only identifies foreign molecules, but also immobilizes, neutralizes, and destroys them.']	3	http://people.physics.illinois.edu/Celia/Verbs.pdf
346	celia_2021	A numerical approach was devised that enables the fast and efficient determination of the ternary diagrams associated with our Gibbs free energy.	['A new numerical approach quickly and efficiently determines the ternary diagrams associated with our Gibbs free energy.']	3	http://people.physics.illinois.edu/Celia/Verbs.pdf
347	celia_2021	Generally, a storage ring is used not only to store charged particles, but also to define their energy and trajectory.	['Generally, a storage ring not only stores charged particles but also defines their energy and trajectory.']	4	http://people.physics.illinois.edu/Celia/Verbs.pdf
348	celia_2021	There were several methods used to produce the thin metal substrates - hot stamping, cold rolling, and cleaving.	['Thin metal substrates were produced by several methods - hot stamping, cold rolling, and cleaving.']	3	http://people.physics.illinois.edu/Celia/Verbs.pdf
349	boras_2021	In the future, please turn in assignments on time, by or on the deadline.	['Please turn in assignments on time.']	1	https://www.hb.se/en/staff/my-employment/competence-development/academic-communication/writing-concisely/
350	boras_2021	I finished my math and science homework while I was in study hall.	['I finished my math and science homework in study hall.']	1	https://www.hb.se/en/staff/my-employment/competence-development/academic-communication/writing-concisely/
351	boras_2021	We outlined the letters for the banner in a careful way.	['We outlined the letters for the banner carefully.']	2	https://www.hb.se/en/staff/my-employment/competence-development/academic-communication/writing-concisely/
352	boras_2021	Use a diminutive word, please.	['Use a small word, please.']	2	https://www.hb.se/en/staff/my-employment/competence-development/academic-communication/writing-concisely/
353	arkansas_university_2021	The man was seen by the cat resting on the window.	['The cat resting on the window saw the man.']	3	https://www.astate.edu/a/global-initiatives/online/a-state-online-services/online-writing-center/resources/Concise%20Writing.pdf
354	arkansas_university_2021	When I went over to the meadow, I picked up some flowers and then placed the flowers inside of a vase at my grandmother's house.	["I placed flowers in a vase at my grandmother's house that I picked from a meadow."]	3	https://www.astate.edu/a/global-initiatives/online/a-state-online-services/online-writing-center/resources/Concise%20Writing.pdf
355	arkansas_university_2021	He went to lie down on the bed.	['He lay on the bed.']	2	https://www.astate.edu/a/global-initiatives/online/a-state-online-services/online-writing-center/resources/Concise%20Writing.pdf
356	arkansas_university_2021	The fact that the cat had a sweet personality factored into why I decided to adopt her.	['I adopted the cat because she had a sweet personality.']	3	https://www.astate.edu/a/global-initiatives/online/a-state-online-services/online-writing-center/resources/Concise%20Writing.pdf
357	arkansas_university_2021	She used things like examples to convey her message.	['She used examples to convey her message.']	1	https://www.astate.edu/a/global-initiatives/online/a-state-online-services/online-writing-center/resources/Concise%20Writing.pdf
358	adelaide_2021	It was found that after the main shock, several smaller movements continued to occur.	['Several smaller movements continued to occur after the main shock.']	1	https://www.adelaide.edu.au/writingcentre/sites/default/files/docs/learningguide-concisewriting.pdf
359	adelaide_2021	It was not until after the last batch of votes was counted, that victory could be declared by the Senator.	['The Senator declared victory after the last batch of votes was counted.']	1	https://www.adelaide.edu.au/writingcentre/sites/default/files/docs/learningguide-concisewriting.pdf
360	adelaide_2021	The warning system promulgated its message just minutes before the tsunami struck.	['The warning system was activated just minutes before the tsunami struck.']	2	https://www.adelaide.edu.au/writingcentre/sites/default/files/docs/learningguide-concisewriting.pdf
361	adelaide_2021	This essay discusses the successes of Japan's Disaster Risk Management (DRM) system, as well as the ways in which that system could be improved.	["This essay discusses the successes of Japan's Disaster Risk Management (DRM) system, and how that system could be improved."]	2	https://www.adelaide.edu.au/writingcentre/sites/default/files/docs/learningguide-concisewriting.pdf
362	adelaide_2021	As mentioned earlier, Japan's DRM system could be improved.	["Japan's DRM system could be improved."]	1	https://www.adelaide.edu.au/writingcentre/sites/default/files/docs/learningguide-concisewriting.pdf
363	san_jose_2021	In my opinion, it is important that all college students participate in the electoral process by casting their vote.	['All college students should vote.']	4	https://www.sjsu.edu/writingcenter/docs/handouts/Writing%20Concisely.pdf
364	san_jose_2021	Actually, Mary kind of glanced at Bob when she realized they had basically lost the battle.	['Mary glanced at Bob when she realized they had lost the battle.']	1	https://www.sjsu.edu/writingcenter/docs/handouts/Writing%20Concisely.pdf
365	san_jose_2021	The future plan Congress will propose to completely overhaul the healthcare system could negatively frustrate constituents.	['The plan Congress will propose to overhaul the healthcare system could frustrate constituents.']	1	https://www.sjsu.edu/writingcenter/docs/handouts/Writing%20Concisely.pdf
366	san_jose_2021	When I asked her about the new job, she sort of looked at me with anger and basically did not reply.	['When I asked her about the new job, she looked at me with anger and did not reply.']	1	https://www.sjsu.edu/writingcenter/docs/handouts/Writing%20Concisely.pdf
367	san_jose_2021	Now that Bob has truly been fired, appealing to the CEO is kind of useless.	['Now that Bob has been fired, appealing to the CEO is useless.']	1	https://www.sjsu.edu/writingcenter/docs/handouts/Writing%20Concisely.pdf
368	san_jose_2021	Each individual will receive a free gift during the ceremony.	['Each individual will receive a gift during the ceremony.']	1	https://www.sjsu.edu/writingcenter/docs/handouts/Writing%20Concisely.pdf
369	san_jose_2021	Committee members first began by discussing the new marketing plan; then they presented the true facts about foreign imports from Belgium.	['Committee members first discussed the new marketing plan; then they presented the facts about imports from Belgium.']	4	https://www.sjsu.edu/writingcenter/docs/handouts/Writing%20Concisely.pdf
370	san_jose_2021	Anthropologists really believe these old fossils are absolutely crucial to uncovering our past history.	['Anthropologists believe these fossils are crucial to uncovering our history.']	1	https://www.sjsu.edu/writingcenter/docs/handouts/Writing%20Concisely.pdf
371	nevada_2021	The zombies' feast of the survivors occurred.	['The zombies feasted on the survivors.']	3	https://www.unr.edu/writing-speaking-center/student-resources/writing-speaking-resources/guidelines-for-clarity-and-concision
372	richmond_2021	In this passage is an example of the use of the rule of justice in argumentation.	['This passage exemplifies argumentation using the rule of justice.']	3	http://writing2.richmond.edu/writing/wweb/concise.html
373	richmond_2021	The point I wish to make is that fish sleep with their eyes open.	['Fish sleep with their eyes open.']	1	http://writing2.richmond.edu/writing/wweb/concise.html
374	richmond_2021	Burning books is considered censorship by some people.	['Some people consider burning books censorship.']	3	http://writing2.richmond.edu/writing/wweb/concise.html
375	richmond_2021	The theory of relativity isn't demonstrated by this experiment.	['This experiment does not demonstrate the theory of relativity.']	3	http://writing2.richmond.edu/writing/wweb/concise.html
376	une_2020	For the most part, individuals in graduate classes are appreciative of conciseness.	['Graduate students generally appreciate conciseness.']	4	https://online.une.edu/blog/5-tips-concise-writing/
377	une_2020	Superintendents will be interviewed by the teachers they work for.	['Teachers will interview their superintendents.']	3	https://online.une.edu/blog/5-tips-concise-writing/
378	une_2020	The success of the pilot program is reflected in the number of children in elementary school who are healthy.	["The number of healthy elementary students reflects the pilot program's success."]	5	https://online.une.edu/blog/5-tips-concise-writing/
379	une_2020	Improvements in your writing will be seen if you remove prepositional phrases that aren't necessary.	['Removing unnecessary prepositional phrases will improve your writing.']	3	https://online.une.edu/blog/5-tips-concise-writing/
380	une_2020	Write a biographical essay of your life.	['Write a biography.']	2	https://online.une.edu/blog/5-tips-concise-writing/
381	une_2020	Reach a consensus of opinion with your group members.	['Reach a consensus with your group members.']	1	https://online.une.edu/blog/5-tips-concise-writing/
382	une_2020	To get started with your reflective writing assignment, imagine a mental picture of a time when you found learning to be extremely difficult.	['As you begin your reflection, remember a time when learning was difficult.']	4	https://online.une.edu/blog/5-tips-concise-writing/
383	une_2020	As you complete the analysis, be keep in mind the methods and procedures that direct the processes of our judicial system.	['As you complete the analysis, consider the common processes of the judiciary.']	4	https://online.une.edu/blog/5-tips-concise-writing/
384	une_2020	Your assigned reading for the course will describe many of the problems and mistakes that can make projects more difficult for students than they need to be.	['Your assigned course reading describes many project pitfalls students may encounter.']	5	https://online.une.edu/blog/5-tips-concise-writing/
385	georgetown_law_2021	The brief was read by us.	['We read the brief.']	3	https://www.law.georgetown.edu/wp-content/uploads/2019/08/CONCISE-IS-NICE.pdf
386	georgetown_law_2021	The evidence was suppressed by the court.	['The court suppressed the evidence.']	3	https://www.law.georgetown.edu/wp-content/uploads/2019/08/CONCISE-IS-NICE.pdf
387	georgetown_law_2021	The holding was reached by the court.	['The court held.']	3	https://www.law.georgetown.edu/wp-content/uploads/2019/08/CONCISE-IS-NICE.pdf
388	georgetown_law_2021	The argument was presented by the plaintiff.	['The plaintiff argued.']	3	https://www.law.georgetown.edu/wp-content/uploads/2019/08/CONCISE-IS-NICE.pdf
389	georgetown_law_2021	A complaint was filed by the union.	['The union filed the complaint.']	3	https://www.law.georgetown.edu/wp-content/uploads/2019/08/CONCISE-IS-NICE.pdf
390	georgetown_law_2021	Our conclusion is supported by legislative history.	['Legislative history supports our conclusion.']	3	https://www.law.georgetown.edu/wp-content/uploads/2019/08/CONCISE-IS-NICE.pdf
391	georgetown_law_2021	It is possible for the court to modify the judgment.	['The court can modify the judgment.']	3	https://www.law.georgetown.edu/wp-content/uploads/2019/08/CONCISE-IS-NICE.pdf
392	georgetown_law_2021	The implementation of the plan by the team was successful.	['The team successfully implemented the plan.']	3	https://www.law.georgetown.edu/wp-content/uploads/2019/08/CONCISE-IS-NICE.pdf
393	georgetown_law_2021	There was an affirmative decision for expansion by the administration.	['The administration decided to expand the program.']	3	https://www.law.georgetown.edu/wp-content/uploads/2019/08/CONCISE-IS-NICE.pdf
394	georgetown_law_2021	A revision of the program will result in increases of efficiency to our clients.	['If we revise the program, we can serve clients more efficiently.']	3	https://www.law.georgetown.edu/wp-content/uploads/2019/08/CONCISE-IS-NICE.pdf
395	byu_2021	The smoke that comes from factories that are situated in the valley pollutes the air.	['The smoke from factories in the valley pollutes the air.']	1	https://rwc.byu.edu/files/2019/08/Concise-Writing.pdf
396	byu_2021	University students are required by the university to make payments of their tuition fees before the time of their registration.	['University students are required to pay tuition before registering.']	4	https://rwc.byu.edu/files/2019/08/Concise-Writing.pdf
397	byu_2021	The match had been won by the world champion shortly after it started.	['The world champion won the match shortly after it started.']	3	https://rwc.byu.edu/files/2019/08/Concise-Writing.pdf
398	byu_2021	The accident occurred due to the fact that there was nothing to prevent it.	['The accident occurred because there was nothing to prevent it.']	2	https://rwc.byu.edu/files/2019/08/Concise-Writing.pdf
399	byu_2021	The nature of the crisis situation was such that it called for our immediate attention.	['The crisis called for our immediate attention.']	1	https://rwc.byu.edu/files/2019/08/Concise-Writing.pdf
400	byu_2021	Upon reflection, I remembered eating bread and cheese at the reception.	['I remembered eating bread and cheese at the reception.']	1	https://rwc.byu.edu/files/2019/08/Concise-Writing.pdf
401	jmu_2021	In my opinion, in response to the issue of wordy sentences in college writing, it is my belief that a tool for revision is needed.	['I believe college students need sentence revision strategies.']	7	https://www.jmu.edu/uwc/files/link-library/writingconcisely.pdf
402	jmu_2021	What I wish to show here is that James Madison University is a good representation of a place with many backgrounds and interests of the students.	['James Madison University represents a diverse university.']	6	https://www.jmu.edu/uwc/files/link-library/writingconcisely.pdf
403	ieee_2021	The report is waiting for your approval.	['The report awaits your approval.']	2	https://procomm.ieee.org/communication-resources-for-engineers/style/write-clearly-and-concisely/
404	ieee_2021	It is a matter of the gravest importance to the health of anyone who uses a microwave and has a heart condition to avoid standing in front of the microwave while it is running.	['Anyone with a heart condition should avoid standing in front of an operating microwave oven.']	6	https://procomm.ieee.org/communication-resources-for-engineers/style/write-clearly-and-concisely/
405	stlcc_2021	My sister is loud when she is telling her children to do their homework.	['My sister bellows when telling her children to do their homework.']	2	https://stlcc.edu/student-support/academic-success-and-tutoring/writing-center/writing-resources/replacing-to-be-verbs.aspx
406	stlcc_2021	The restaurant's food is excellent.	['The restaurant serves excellent food.']	3	https://stlcc.edu/student-support/academic-success-and-tutoring/writing-center/writing-resources/replacing-to-be-verbs.aspx
407	stlcc_2021	Jennifer Lawrence is the star of The Hunger Games.	['Jennifer Lawrence stars in The Hunger Games.']	2	https://stlcc.edu/student-support/academic-success-and-tutoring/writing-center/writing-resources/replacing-to-be-verbs.aspx
408	stlcc_2021	Our mother was the driver of the bus.	['Our mother drove the bus.']	3	https://stlcc.edu/student-support/academic-success-and-tutoring/writing-center/writing-resources/replacing-to-be-verbs.aspx
409	stlcc_2021	It is my intention to transfer to a four-year university.	['I intend to transfer to a four-year university.']	3	https://stlcc.edu/student-support/academic-success-and-tutoring/writing-center/writing-resources/replacing-to-be-verbs.aspx
410	stlcc_2021	There were some important findings resulting from this experiment.	['This experiment resulted in some important findings.']	3	https://stlcc.edu/student-support/academic-success-and-tutoring/writing-center/writing-resources/replacing-to-be-verbs.aspx
411	stlcc_2021	He struggled with the paper that was assigned by the professor.	['He struggled with the paper assigned by the professor.']	1	https://stlcc.edu/student-support/academic-success-and-tutoring/writing-center/writing-resources/replacing-to-be-verbs.aspx
412	stlcc_2021	Electric car technology was in existence as early as 1830.	['Electric car technology existed as early as 1830.']	2	https://stlcc.edu/student-support/academic-success-and-tutoring/writing-center/writing-resources/replacing-to-be-verbs.aspx
413	stlcc_2021	Negative advertising is influential on voters' perceptions of candidates.	["Negative advertising influences voters' perceptions of candidates."]	2	https://stlcc.edu/student-support/academic-success-and-tutoring/writing-center/writing-resources/replacing-to-be-verbs.aspx
414	stlcc_2021	I am in receipt of your letter.	['I received your letter.']	2	https://stlcc.edu/student-support/academic-success-and-tutoring/writing-center/writing-resources/replacing-to-be-verbs.aspx
415	stlcc_2021	The stock market was fluctuating wildly before the crash.	['The stock market fluctuated wildly before the crash.']	2	https://stlcc.edu/student-support/academic-success-and-tutoring/writing-center/writing-resources/replacing-to-be-verbs.aspx
416	stlcc_2021	The concept of immortality is intriguing to me.	['The concept of immortality intrigues me.']	2	https://stlcc.edu/student-support/academic-success-and-tutoring/writing-center/writing-resources/replacing-to-be-verbs.aspx
417	ndsu_2021	In reviewing the notes of his lecture, he referred back to what he had written before class.	['He reviewed his lecture notes.']	6	https://www.ndsu.edu/pubweb/~rcollins/313editing/leads.htm
418	ndsu_2021	There are four employees who have filed grievances.	['Four employees have filed grievances.']	1	https://www.ndsu.edu/pubweb/~rcollins/313editing/leads.htm
419	ndsu_2021	It is our suspicion that the basement was substandard.	['We suspect the basement was substandard.']	3	https://www.ndsu.edu/pubweb/~rcollins/313editing/leads.htm
420	ndsu_2021	What we need to do next is simplify our sign-off procedure.	['Next, we need to simplify our sign-off procedure.']	2	https://www.ndsu.edu/pubweb/~rcollins/313editing/leads.htm
421	ndsu_2021	Make a revision of this sentence.	['Revise this sentence.']	2	https://www.ndsu.edu/pubweb/~rcollins/313editing/leads.htm
422	palomar_2021	We would like to call your attention and to the attention of others in your office to the fact that your report is overdue because the deadline was last Friday.	['We remind you that your report is overdue.']	4	www2.palomar.edu/pages/eminamide/files/2013/02/Practice-Writing-Concisely.pdf
423	palomar_2021	The document that you refer back to is not included in the sample documents that go to make up the enclosure.	['The document is not included in the samples.']	1	www2.palomar.edu/pages/eminamide/files/2013/02/Practice-Writing-Concisely.pdf
424	palomar_2021	The purpose of this memo is to provide a reference for all your staff members of the formats of various documents that go forward by transmission to headquarters.	['This memo describes the formats for documents going to headquarters.']	3	www2.palomar.edu/pages/eminamide/files/2013/02/Practice-Writing-Concisely.pdf
425	palomar_2021	The need for reports that have logic and are relevant is still great.	['We need logical, relevant reports.']	3	www2.palomar.edu/pages/eminamide/files/2013/02/Practice-Writing-Concisely.pdf
426	palomar_2021	Your statement in your letter that has the contention that the information submitted and sent to you by us contained certain inaccuracies and errors has prompted us to embark on a careful and thorough reevaluation of the information submitted, with the result that the original informative data has been determined to be accurate and correct in all instances and aspects of the information.	['As you suggested, we have checked our information and confirmed its accuracy.']	6	www2.palomar.edu/pages/eminamide/files/2013/02/Practice-Writing-Concisely.pdf
427	palomar_2021	In the event that some information concerning Mr. Smith should be brought to your attention, it should be forwarded via mail or courier or telephone to us in view of the possibility that the information may reveal any attempt on the part of Mr. Smith to depart from the United States.	['If you get any information about Mr. Smith, please contact us in case he tries to leave the country.']	7	www2.palomar.edu/pages/eminamide/files/2013/02/Practice-Writing-Concisely.pdf
428	loyola_2021	Sometimes it is not easy to avoid the dummy subject.	['Sometimes the dummy subject is not easily avoided.']	3	https://www.luc.edu/literacy/style_sheets.shtml
429	loyola_2021	She fell down due to the fact that she hurried.	['She fell because she hurried.']	4	https://www.luc.edu/literacy/style_sheets.shtml
430	loyola_2021	The resolution to the problem can be seen in author's attempt.	['The author resolves the problem.']	3	https://www.luc.edu/literacy/style_sheets.shtml
431	loyola_2021	His objective was to win, but playing fair also mattered to him.	['His objective was not only to win, but also to play fair.']	3	https://www.luc.edu/literacy/style_sheets.shtml
432	loyola_2021	The author shows the reader the path to being virtuous rather than to vice.	['The author shows the reader the path to virtue rather than to vice.']	2	https://www.luc.edu/literacy/style_sheets.shtml
433	loyola_2021	Both Smith and Jones took different views of the war.	['Smith and Jones took different views of the war.']	1	https://www.luc.edu/literacy/style_sheets.shtml
434	loyola_2021	Both Smith and Jones took the same view of the war.	['Smith and Jones took the same view of the war.']	1	https://www.luc.edu/literacy/style_sheets.shtml
435	loyola_2021	For his young readers, the author must avoid intimidating them by taking too much for granted.	['The author must avoid intimidating young readers by taking too much for granted.']	1	https://www.luc.edu/literacy/style_sheets.shtml
436	wisc_2021_act	It was earlier demonstrated that heart attacks can be caused by high stress.	['Researchers earlier showed that high stress can cause heart attacks.']	3	https://writing.wisc.edu/handbook/style/ccs_activevoice/
437	hccs_2021	It is imperative that we find a solution.	['We must find a solution.']	3	https://learning.hccs.edu/faculty/emily.arsenyuk/engl15375/clear-concise-writing-ppt/at_download/file
438	sanmateo_2021	As far as I am concerned, discrimination against certain ethnic groups continues to exist for all intents and purposes.	['Discrimination against certain ethnic groups continues to exist.']	1	https://collegeofsanmateo.edu/writing/tutorials/14_PS_WritingConcisely_Final.pdf
439	sanmateo_2021	At this point in time, the latest iPad is expensive due to the fact that it has no competition.	['Now, the new iPad is expensive because it has no competition.']	4	https://collegeofsanmateo.edu/writing/tutorials/14_PS_WritingConcisely_Final.pdf
440	sanmateo_2021	The reason why Jhumpa Lahiri's novel is so great is because it has vivid imagery.	["Jhumpa Lahiri 's novel is great because it has vivid imagery."]	1	https://collegeofsanmateo.edu/writing/tutorials/14_PS_WritingConcisely_Final.pdf
441	sanmateo_2021	A healthy lifestyle enhances your ability both to live life to its fullest and to live to a ripe old age.	['A healthy lifestyle helps you live life fully and longer.']	5	https://collegeofsanmateo.edu/writing/tutorials/14_PS_WritingConcisely_Final.pdf
442	sanmateo_2021	Past history shows that the students who transfer are actually very few in number.	['History shows that the students who transfer are actually very few.']	1	https://collegeofsanmateo.edu/writing/tutorials/14_PS_WritingConcisely_Final.pdf
443	sanmateo_2021	President George W. Bush made serious errors in responding to the sudden crisis that followed the terrible tragedy of September 11.	['President George W. Bush made serious errors in responding to the crisis that followed the tragedy of September 11.']	1	https://collegeofsanmateo.edu/writing/tutorials/14_PS_WritingConcisely_Final.pdf
444	ursinus_2021	I think that basically we need to use fewer words, or our papers will really be much too long.	['We need to use fewer words, or our papers will be too long.']	1	https://www.ursinus.edu/live/files/1174-writing-concisely-pdf
445	lakeforest_2021	Due to the fact that Ursula babysat every Thursday evening, she could not attend Michael's recital.	["Ursula babysat every Thursday evening, she could not attend Michael's recital."]	1	https://foresternet.lakeforest.edu/live/files/tips-for-writing-concisely-51513pdf.pdf
446	lakeforest_2021	The committee's first and foremost goal is to strategize ways to eliminate excess spending.	["The committee's foremost goal is to strategize ways to eliminate excess spending."]	1	https://foresternet.lakeforest.edu/live/files/tips-for-writing-concisely-51513pdf.pdf
447	lakeforest_2021	Do not write in the negative.	['Write in the affirmative.']	1	https://foresternet.lakeforest.edu/live/files/tips-for-writing-concisely-51513pdf.pdf
448	lakeforest_2021	Not many parishioners commented that Father Donnelly does not have the same charisma as Father Marks.	["Few parishioners commented that Father Donnelly lacks Father Marks' charisma."]	5	https://foresternet.lakeforest.edu/live/files/tips-for-writing-concisely-51513pdf.pdf
449	ucalgary_2021	There were many students at the lecture.	['Many students attended the lecture.']	3	https://lc.ucalgary.edu.qa/writingstyle/concise
450	ucalgary_2021	The patient's condition was very unstable.	["The patient's condition was unstable."]	1	https://lc.ucalgary.edu.qa/writingstyle/concise
451	ucalgary_2021	The author does an analysis of the problem.	['The author analyzes the problem.']	2	https://lc.ucalgary.edu.qa/writingstyle/concise
452	ucalgary_2021	In my opinion, one of the most important steps of the learning process is understanding how the learning process happens.	['One of the most important steps of the learning process is understanding how it happens.']	4	https://lc.ucalgary.edu.qa/writingstyle/concise
453	ucalgary_2021	In my opinion, the role of nurse practitioner (NP) should be introduced to more clinics since NPs can perform many of the tasks assumed by physicians.	['The role of nurse practitioner (NP) should be introduced to more clinics since NPs can perform many of the tasks assumed by physicians.']	1	https://lc.ucalgary.edu.qa/writingstyle/concise
454	ucalgary_2021	They did not succeed in reviving the patient.	['They failed to revive the patient.']	2	https://lc.ucalgary.edu.qa/writingstyle/concise
455	ucalgary_2021	They were not successful in reviving the patient.	['They failed to revive the patient.']	2	https://lc.ucalgary.edu.qa/writingstyle/concise
456	college_2021	Unencumbered by a sense of responsibility, Jason left his new leather jacket on the bus.	['Jason irresponsibly left his new leather jacket on the bus.']	2	https://www.touro.edu/departments/writing-center/tutorials/writing-concise-sentences/
457	indianatech_2021	There is a unique, eccentric, and opposite way to accomplish this burdensome task.	['There is an unusual way to complete this task.']	2	studentsuccess.indianatech.edu/wp-content/uploads/sites/20/Writing-concisely.pdf
458	indianatech_2021	I really enjoy sourdough bread.	['I enjoy sourdough bread.']	1	studentsuccess.indianatech.edu/wp-content/uploads/sites/20/Writing-concisely.pdf
459	indianatech_2021	She basically said no to me.	['She said no to me.']	1	studentsuccess.indianatech.edu/wp-content/uploads/sites/20/Writing-concisely.pdf
460	indianatech_2021	The gift was received by James.	['James received the gift.']	3	studentsuccess.indianatech.edu/wp-content/uploads/sites/20/Writing-concisely.pdf
461	ualberta_2021	Productivity actually depends on certain factors that basically involve psychology more than any particular technology.	['Productivity depends on psychology more than on technology.']	4	https://www.ualberta.ca/media-library/ualberta/students/centre-for-writers/documents/resources/concise-writing.pdf
462	ualberta_2021	She proposed various and sundry explanations for the procedure.	['She proposed various explanations for the procedure.']	1	https://www.ualberta.ca/media-library/ualberta/students/centre-for-writers/documents/resources/concise-writing.pdf
463	ualberta_2021	Their software programs demonstrated and showed that many companies and businesses could benefit and profit from eliminating unnecessary overhead and expenses.	['Their software showed that companies could profit from eliminating unnecessary overhead.']	1	https://www.ualberta.ca/media-library/ualberta/students/centre-for-writers/documents/resources/concise-writing.pdf
464	ualberta_2021	Do not try to predict those future events that will completely revolutionize society, because past history shows that it is the final outcome of minor events that unexpectedly surprises us more.	['Do not try to predict revolutionary events, because history shows that the outcome of minor events surprises us more.']	2	https://www.ualberta.ca/media-library/ualberta/students/centre-for-writers/documents/resources/concise-writing.pdf
465	ualberta_2021	In the event that you finish early, contact this office.	['If you finish early, contact the office.']	3	https://www.ualberta.ca/media-library/ualberta/students/centre-for-writers/documents/resources/concise-writing.pdf
466	ualberta_2021	There is a need for more careful inspections of all welds.	['You must inspect all welds more carefully.']	3	https://www.ualberta.ca/media-library/ualberta/students/centre-for-writers/documents/resources/concise-writing.pdf
467	ualberta_2021	By the time she got home, Merdine was very tired.	['By the time she got home, Merdine was exhausted.']	2	https://www.ualberta.ca/media-library/ualberta/students/centre-for-writers/documents/resources/concise-writing.pdf
468	ualberta_2021	She was also really hungry.	['She was also hungry.']	1	https://www.ualberta.ca/media-library/ualberta/students/centre-for-writers/documents/resources/concise-writing.pdf
469	ualberta_2021	The last point I would like to make is that in regard to men-women relationships, it is important to keep in mind that the greatest changes have occurred in how they work together.	['Men and women have changed their relationships most in how they work together.']	4	https://www.ualberta.ca/media-library/ualberta/students/centre-for-writers/documents/resources/concise-writing.pdf
470	ualberta_2021	High divorce rates have been observed to occur in areas that have been determined to have low population density.	['High divorce rates occur in areas with low population density.']	4	https://www.ualberta.ca/media-library/ualberta/students/centre-for-writers/documents/resources/concise-writing.pdf
471	ualberta_2021	This section introduces another problem, that of noise pollution.	['Another problem is noise pollution.']	4	https://www.ualberta.ca/media-library/ualberta/students/centre-for-writers/documents/resources/concise-writing.pdf
472	evansville_2021	The church, which was completed in 1875, dominated the skyline.	['Completed in 1875, the church dominated the skyline.']	3	https://www.evansville.edu/writingcenter/downloads/conciseness.pdf
473	evansville_2021	The man, who was intelligent, built a time machine.	['The intelligent man built a time machine.']	1	https://www.evansville.edu/writingcenter/downloads/conciseness.pdf
474	evansville_2021	There are twelve children who would like ice cream.	['Twelve children would like ice cream.']	1	https://www.evansville.edu/writingcenter/downloads/conciseness.pdf
475	evansville_2021	It is he who stole the car.	['He stole the car.']	1	https://www.evansville.edu/writingcenter/downloads/conciseness.pdf
476	uliberty_2021	Brother Edward is now employed at a private rehabilitation center working as a certified physical therapist.	['Brother Edward works at a private rehabilitation center as a certified physical therapist.']	4	https://www.liberty.edu/media/1171/On_Writing_Concisely.pdf
477	uliberty_2021	Sally was determined in her mind to lose weight.	['Sally was determined to lose weight.']	1	https://www.liberty.edu/media/1171/On_Writing_Concisely.pdf
478	uliberty_2021	Thirty-somethings are often thought of or stereotyped as apathetic.	['Thirty-somethings are often stereotyped as apathetic.']	1	https://www.liberty.edu/media/1171/On_Writing_Concisely.pdf
479	uliberty_2021	Our fifth patient, in room six, is a mentally ill patient.	['Our fifth patient, in room six, is mentally ill.']	1	https://www.liberty.edu/media/1171/On_Writing_Concisely.pdf
480	uliberty_2021	The best instructors help each student to become a better student both academically and emotionally.	['The best instructors help each student grow both academically and emotionally.']	4	https://www.liberty.edu/media/1171/On_Writing_Concisely.pdf
481	uliberty_2021	In my opinion, our current tax policy is misguided.	['Our current tax policy is misguided.']	1	https://www.liberty.edu/media/1171/On_Writing_Concisely.pdf
482	uliberty_2021	It certainly seems that The Telltale Heart is Edgar Allen Poe's most macabre story.	["The Telltale Heart is Edgar Allen Poe's most macabre story."]	1	https://www.liberty.edu/media/1171/On_Writing_Concisely.pdf
483	uliberty_2021	I will file the proper papers in the event that I am unable to meet the deadline.	['I will file the proper papers if I cannot meet the deadline.']	2	https://www.liberty.edu/media/1171/On_Writing_Concisely.pdf
484	uliberty_2021	The investment analyst claimed that because of volatile market conditions, he could not make an estimate of the company's future profits.	["The investment analyst claimed that because of volatile market conditions, he could not estimate the company's future profits."]	1	https://www.liberty.edu/media/1171/On_Writing_Concisely.pdf
485	uliberty_2021	Mervina is responsible for monitoring and balancing the budgets for travel, contract services, and personnel.	['Mervina monitors and balances the budgets for travel, contract services, and personnel.']	2	https://www.liberty.edu/media/1171/On_Writing_Concisely.pdf
486	uliberty_2021	There is another book that tells the story of Karl Marx and explains his theory of socialism.	['Another book tells the story of Karl Marx and explains his theory of socialism.']	1	https://www.liberty.edu/media/1171/On_Writing_Concisely.pdf
487	uliberty_2021	All too often, athletes with minimal academic skills have been recruited by our coaches.	['All too often, our coaches have recruited athletes with minimal academic skills.']	3	https://www.liberty.edu/media/1171/On_Writing_Concisely.pdf
488	uliberty_2021	My family took a side trip to Monticello, which was the home of Thomas Jefferson.	['My family took a side trip to Monticello, the home of Thomas Jefferson.']	1	https://www.liberty.edu/media/1171/On_Writing_Concisely.pdf
489	uliberty_2021	For her birthday we gave Harriet a stylish vest made out of silk.	['For her birthday we gave Harriet a stylish silk vest.']	1	https://www.liberty.edu/media/1171/On_Writing_Concisely.pdf
490	ukentucky_2021	The pizza was eaten by the students.	['The students ate the pizza.']	3	https://uknowledge.uky.edu/cgi/viewcontent.cgi?article=1048&context=law_facpub_pop
491	ukentucky_2021	The attorney made an investigation of the case.	['The attorney investigated the case.']	2	https://uknowledge.uky.edu/cgi/viewcontent.cgi?article=1048&context=law_facpub_pop
492	duke_university_2021	The cause of our schools' failure at teaching basic skills is not understanding the influence of cultural background on learning.	['Our schools have failed to teach basic skills because educators do not understand how cultural backgrounds influence learning.']	5	https://twp.duke.edu/sites/twp.duke.edu/files/file-attachments/clarity-and-conciseness-shortened-1.original.pdf
493	duke_university_2021	A revision of the program will result in increases in our efficiency in the servicing of our customers.	['If we revise the program, we can serve our customers more efficiently.']	3	https://twp.duke.edu/sites/twp.duke.edu/files/file-attachments/clarity-and-conciseness-shortened-1.original.pdf
494	duke_university_2021	It was decided by the Director to expand the program.	['The Director decided to expand the program.']	1	https://twp.duke.edu/sites/twp.duke.edu/files/file-attachments/clarity-and-conciseness-shortened-1.original.pdf
495	duke_university_2021	It is vital that we delete the word "absolutely."	['We must delete the word "absolutely."']	2	https://twp.duke.edu/sites/twp.duke.edu/files/file-attachments/clarity-and-conciseness-shortened-1.original.pdf
496	duke_university_2021	There are five car alarms that are blaring in the parking lot.	['Five car alarms are blaring in the parking lot.']	1	https://twp.duke.edu/sites/twp.duke.edu/files/file-attachments/clarity-and-conciseness-shortened-1.original.pdf
497	iqbal_2021	There are many engineers who like to write.	['Many engineers like to write.']	1	https://robot.unipv.it/toolleeo/swifj/Part-III-Writing_Concisely.pdf
498	iqbal_2021	There are many ways in which we can arrange the pulleys.	['We can arrange the pulleys in many ways.']	1	https://robot.unipv.it/toolleeo/swifj/Part-III-Writing_Concisely.pdf
499	iqbal_2021	The meeting happened on Monday.	['The meeting happened Monday.']	1	https://robot.unipv.it/toolleeo/swifj/Part-III-Writing_Concisely.pdf
500	iqbal_2021	They agreed that it was true.	['They agreed it was true.']	1	https://robot.unipv.it/toolleeo/swifj/Part-III-Writing_Concisely.pdf
501	rambo_2019	George's wife is a woman who is unhappy because of the fact that George ignores her.	["George's wife is unhappy because George ignores her."]	1	http://facultyweb.ivcc.edu/rrambo/eng1001/conciseness.htm
502	rambo_2019	In this day and age, people are under the impression that it is important to express ideas in a concise manner.	['Today, people think it is important to express ideas concisely.']	2	http://facultyweb.ivcc.edu/rrambo/eng1001/conciseness.htm
503	rambo_2019	Hemingway conveys the idea that the setting of the story reflects the troubled relationship between George and his wife.	['The setting of the story reflects the troubled relationship between George and his wife.']	1	http://facultyweb.ivcc.edu/rrambo/eng1001/conciseness.htm
504	rambo_2019	If one looks at the painting carefully, one notices that there are dark clouds gathering over the mountains.	['Dark clouds gather over the mountains. ', ' There are dark clouds gathering over the mountains.']	4	http://facultyweb.ivcc.edu/rrambo/eng1001/conciseness.htm
505	rambo_2019	There are children that are playing near the base of the mountain.	['Children are playing near the base of the mountain.']	1	http://facultyweb.ivcc.edu/rrambo/eng1001/conciseness.htm
506	rambo_2019	There is a snow-capped mountain that appears on the left, and there are storm clouds that are gathering in the background.	['A snow-capped mountain appears on the left, and storm clouds are gathering in the background.']	1	http://facultyweb.ivcc.edu/rrambo/eng1001/conciseness.htm
507	rambo_2019	In the story "Cat in the Rain," the setting of the story reflects the troubled relationship between George and his wife in the story.	['In the story "Cat in the Rain," the setting reflects the troubled relationship between George and his wife.']	1	http://facultyweb.ivcc.edu/rrambo/eng1001/conciseness.htm
508	rambo_2019	The gathering storm clouds appear threatening and ominous.	['The gathering storm clouds appear threatening. ', ' The gathering storm clouds appear ominous.']	1	http://facultyweb.ivcc.edu/rrambo/eng1001/conciseness.htm
509	rambo_2019	The gathering clouds are emphasized by the artist, but the approaching storm does not seem to be noticed by the children.	['The artist emphasizes the gathering clouds, but the children do not seem to notice the approaching storm.']	3	http://facultyweb.ivcc.edu/rrambo/eng1001/conciseness.htm
510	rambo_2019	The elephant is killed by Orwell even though the villagers are no longer threatened by it.	['Orwell kills the elephant even though it no longer threatens the villagers.']	3	http://facultyweb.ivcc.edu/rrambo/eng1001/conciseness.htm
511	rambo_2019	I think that George's wife is unhappy because George ignores her.	["George's wife is unhappy because George ignores her."]	1	http://facultyweb.ivcc.edu/rrambo/eng1001/conciseness.htm
512	rambo_2019	I believe that the storm clouds suggest the danger that, in my opinion, children sometimes ignore.	['The storm clouds suggest the danger that children sometimes ignore.']	1	http://facultyweb.ivcc.edu/rrambo/eng1001/conciseness.htm
513	rambo_2019	George's wife appears to be unhappy.	["George's wife appears unhappy."]	1	http://facultyweb.ivcc.edu/rrambo/eng1001/conciseness.htm
514	rambo_2019	The storm clouds appear to be dark and ominous, but the children seem to be unaware of the approaching storm.	['The storm clouds appear dark and ominous, but the children seem unaware of the approaching storm.']	1	http://facultyweb.ivcc.edu/rrambo/eng1001/conciseness.htm
515	rambo_2019	George is reading his book while his wife is looking out the window.	['George reads his book while his wife looks out the window.']	2	http://facultyweb.ivcc.edu/rrambo/eng1001/conciseness.htm
516	rambo_2019	Storm clouds are gathering over the mountains.	['Storm clouds gather over the mountains.']	2	http://facultyweb.ivcc.edu/rrambo/eng1001/conciseness.htm
517	uwaterloo_2018	Rather than taking the bull by the horns, she was quiet as a church mouse.	['She avoided confrontation by remaining silent.']	3	https://uwaterloo.ca/writing-and-communication-centre/resources-writing-concisely
518	uwaterloo_2018	The bridge is unstable due to the fact that it was constructed with inferior material.	['The bridge is unstable because it was constructed with inferior material.']	2	https://uwaterloo.ca/writing-and-communication-centre/resources-writing-concisely
519	uwaterloo_2018	All things considered, climate change should be given more attention, in my opinion.	['Climate change should be given more attention.']	1	https://uwaterloo.ca/writing-and-communication-centre/resources-writing-concisely
520	uwaterloo_2018	Last but not least, researchers found several connections between the subjects.	['Lastly, researchers found several connections between the subjects.']	2	https://uwaterloo.ca/writing-and-communication-centre/resources-writing-concisely
521	uwaterloo_2018	Historical context is an important factor to consider while writing literature reviews.	['Historical context must be considered while writing literature reviews.']	2	https://uwaterloo.ca/writing-and-communication-centre/resources-writing-concisely
522	uwaterloo_2018	He received a wound from the clock while he wound it.	['The clock injured him while he wound it.']	3	https://uwaterloo.ca/writing-and-communication-centre/resources-writing-concisely
523	uwaterloo_2018	He was right to assume his subjects are right-handed.	['He correctly assumed his subjects are right-handed.']	2	https://uwaterloo.ca/writing-and-communication-centre/resources-writing-concisely
524	uwaterloo_2018	Subjects with little technical training tend to perform poorly due to their lack of technical experience.	["Some subjects' lack of technical experience resulted in poor performance."]	3	https://uwaterloo.ca/writing-and-communication-centre/resources-writing-concisely
525	uwaterloo_2018	The reason she moved is because she was offered a better position.	['She moved because she was offered a better position.']	1	https://uwaterloo.ca/writing-and-communication-centre/resources-writing-concisely
526	uwaterloo_2018	As already stated above, beluga whales use sounds and echolocation to hunt in dark or turbid waters.	['As stated above, beluga whales use sounds and echolocation to hunt in dark or turbid waters.']	1	https://uwaterloo.ca/writing-and-communication-centre/resources-writing-concisely
527	uwaterloo_2018	It is challenging to read Shakespeare.	['Reading Shakespeare is challenging.']	3	https://uwaterloo.ca/writing-and-communication-centre/resources-writing-concisely
528	uwaterloo_2018	It is significant that a study of ethics complaints against social workers found that half of these involved violation of professional boundaries.	['Significantly, a study of ethics complaints against social workers found that half of these involved violations of professional boundaries.']	2	https://uwaterloo.ca/writing-and-communication-centre/resources-writing-concisely
529	uwaterloo_2018	The researchers conducted an investigation of the effects of caffeine on students writing timed examinations.	['The researchers investigated the effects of caffeine on students writing timed examinations.']	2	https://uwaterloo.ca/writing-and-communication-centre/resources-writing-concisely
530	uwaterloo_2018	The teacher could understand why her students failed the test.	['The teacher understood why her students failed the test.']	2	https://uwaterloo.ca/writing-and-communication-centre/resources-writing-concisely
531	uwaterloo_2018	The reaction was catalyzed by the introduction of light.	['The introduction of light catalyzed the reaction.']	1	https://uwaterloo.ca/writing-and-communication-centre/resources-writing-concisely
532	uwaterloo_2018	The author's expostulation impugns litterateurs of yore.	["The author's argument disproves earlier scholars."]	3	https://uwaterloo.ca/writing-and-communication-centre/resources-writing-concisely
533	celia_2021	Measurements were taken of variations in pressure as function of temperature.	['Pressure was measured as it varied with temperature.']	3	http://people.physics.illinois.edu/Celia/Verbs.pdf
534	ualberta_2021	There is a prize in every box of Quacko cereal.	['A prize is in every box of Quacko cereal.']	1	https://www.ualberta.ca/media-library/ualberta/students/centre-for-writers/documents/resources/concise-writing.pdf
535	ualberta_2021	There are two security guards standing at the gate.	['Two security guards stand at the gate.']	4	https://www.ualberta.ca/media-library/ualberta/students/centre-for-writers/documents/resources/concise-writing.pdf
